# Supplementary material for: Time-Course RNAseq Reveals Exserohilum turcicum Effectors and Pathogenicity Determinants
Source: Front Microbiol. 2020 Mar 20;11:360. doi: 10.3389/fmicb.2020.00360 (PMC7099616; doi:10.3389/fmicb.2020.00360)
Supplement: Supplementary file 2 [file Table_2.XLSX]

## Sheet: Pseudocounts_0.03.txt
Supplementary Table 2 Pseudocount values obtained during dual transcriptome sequencing of the Exserohilum turcicum - Zea mays interaction.
Protein identifier	13N_in vitro	13N_0dpi	13N_2dpi	13N_5dpi	13N_7dpi	13N_13dpi	23N_0dpi	23N_2dpi	23N_5dpi	23N_7dpi	23N_13dpi	23N_SL
36769	1937.61	1.40427	39.8929	94.4341	618.2	26888.6	3.80288	31.4912	222.428	517.62	40914.6	116719
172122	0.387263	6.24055	7.15104	9.8119	18.0898	16702.8	4.09717	3.54902	1.50011	19.6567	27297.1	94292.7
133966	618.289	1.45295	21.3867	21.2036	44.4839	10766.6	5.0359	3.54902	42.4669	138.867	20578.9	71640.3
177728	5.33906	0.0694155	8.57457	13.0667	65.3213	17002.8	2.4828	7.04137	10.278	46.819	17648	47074.4
131269	7.49693	4.04714	8.57457	11.4393	72.267	21489.7	8.92117	7.04137	8.32667e-17	46.819	16522.1	46899
168881	749.103	1.65131	22.8102	37.4774	269.525	10420.9	11.2346	12.2806	83.434	238.46	13939.3	43868.4
172987	10.3651	2.49278	12.8452	24.4584	102.828	12505.9	1.40718	8.78774	20.5199	69.454	13590	42179.5
90143	15.0668	0.0353364	12.8452	8.32667e-17	16.7007	3749.24	1.25767	7.04137	4.42566	6.07552	9855.38	38889.3
166021	381.796	0.0694155	21.3867	16.3215	27.814	4904.79	2.4828	8.78774	29.2988	37.7649	10460.5	36830.7
107517	400.975	1.35092	9.99812	35.85	233.408	9873.83	2.57129	8.78774	73.1923	211.298	14427.1	35836.5
169329	359.341	0.0694155	12.8452	34.2226	211.181	6791.01	2.4828	7.04137	125.864	262.604	9816.18	34148.8
165532	1583.14	1.22207	24.2338	21.2036	70.8779	6614.02	0.0405159	3.54902	20.5199	42.292	10161.7	32574.4
95885	161.411	1.35092	2.88075	1.67616	43.0948	5393.01	2.57129	7.04137	5.88868	22.6747	8788.2	31865.6
168344	1487.77	1.40427	24.2338	96.0614	213.96	12443.6	3.80288	8.78774	96.602	250.532	15470.1	31775.6
162007	9.998	3.94556	5.72753	16.3215	66.7104	7255.18	6.43956	5.2951	2.96278	61.909	8111.3	31341.6
19432	0.906117	2.49278	5.72753	8.32667e-17	26.4248	2943.76	1.40718	1.80339	1.50011	8.32667e-17	8761.01	30798.9
108104	1.80077	0.0353364	1.45761	6.55721	18.0898	3250.8	1.25767	8.32667e-17	1.50011	3.05786	6676.7	30238.7
183842	690.994	2.49278	7.15104	14.6941	134.779	5882.9	1.40718	5.2951	60.0243	164.52	8871.1	29731
166944	2.26043	8.32667e-17	7.15104	1.67616	12.5331	5253.36	8.32667e-17	1.80339	7.35175	4.56662	9350.62	29302.9
166709	66.4754	3.61329	11.4217	4.92996	133.389	4917.16	0.117277	7.04137	2.96278	27.2018	6477.17	29263.2
44481	888.006	0.0694155	15.6924	26.0858	138.946	8810.3	2.4828	10.5341	30.7619	120.76	8808.45	28069
163200	533.806	0.0353364	9.99812	21.2036	119.498	7822.62	1.25767	1.80339	27.8356	90.5798	9320.48	27920.4
96690	10.0668	1.29127	5.72753	8.18453	229.24	10427.9	1.33789	1.80339	2.96278	223.37	8976.94	27231.5
168107	225.799	0.0694155	9.99812	22.831	157.005	6864.05	2.4828	5.2951	58.5612	150.939	9061.26	26051.4
168163	172.203	8.32667e-17	8.57457	26.0858	170.896	5813.42	8.32667e-17	3.54902	64.4136	182.628	7846.43	25507.5
28024	61.5256	1.22207	7.15104	4.92996	33.3707	4762.83	0.0405159	5.2951	5.88868	7.58448	6719.68	25203.4
162701	955.144	5.03493	9.99812	19.5762	291.752	4850.99	4.03192	7.04137	109.77	396.902	7793.11	24475.9
164317	366.032	1.29127	9.99812	13.0667	127.833	7942.53	1.33789	1.80339	19.0568	66.436	9740.69	24437.3
165384	87.1221	1.29127	4.30408	8.18453	23.6465	4499.6	1.33789	3.54902	4.42566	22.6747	7836.29	24376.4
176044	233.406	1.35092	5.72753	17.9489	150.059	5788.08	2.57129	1.80339	41.0038	158.484	7697.34	24265.3
162960	1.1579	8.32667e-17	5.72753	1.67616	43.0948	7332.43	8.32667e-17	10.5341	5.88868	42.292	8237.37	24155.4
167510	358.722	1.29127	12.8452	29.3405	227.851	5823.85	1.33789	3.54902	98.0651	226.388	7107.8	23499.2
113879	13.7597	0.0694155	7.15104	6.55721	48.6514	2791.14	2.4828	5.2951	8.81486	15.1296	5033.83	22823.2
27183	261.888	2.67725	2.88075	13.0667	162.561	6866.71	5.12154	8.32667e-17	45.3931	114.724	9069.39	22120.2
33958	2.81206	8.32667e-17	2.88075	3.30288	23.6465	3212.22	8.32667e-17	1.80339	8.32667e-17	25.6928	6748.5	21536.6
90898	229.099	1.22207	14.2688	14.6941	157.005	5524.28	0.0405159	5.2951	23.4462	98.1248	6912.51	21434.8
163741	1119.71	1.22207	15.6924	9.8119	69.4887	3333.09	0.0405159	8.78774	8.81486	67.945	5889.37	21262.9
167186	0.121574	1.22207	4.30408	3.30288	25.0357	3929.64	0.0405159	1.80339	2.96278	6.07552	6834.38	20963.4
163249	8.75906	1.45295	5.72753	11.4393	62.5429	7749.65	5.0359	10.5341	7.35175	64.927	5929.46	20772.8
165465	678.919	0.0353364	9.99812	14.6941	148.67	4372.78	1.25767	1.80339	49.7825	173.574	6537.85	20722.5
162922	23.6414	8.32667e-17	7.15104	6.55721	25.0357	2899.83	8.32667e-17	3.54902	8.32667e-17	1.54936	4084.07	20393.8
94331	277.493	1.29127	9.99812	8.18453	132	5745.17	1.33789	5.2951	42.4669	110.197	6676.8	20273.3
164921	777.356	1.29127	19.9631	17.9489	163.951	5036.88	1.33789	12.2806	36.6144	73.9809	6261.76	20258.1
103365	3.06486	1.35092	7.15104	11.4393	31.9815	5460.23	2.57129	7.04137	4.42566	33.2379	6443.56	20007.8
156979	381.43	1.22207	7.15104	13.0667	112.552	4983.71	0.0405159	5.2951	51.2456	104.161	6467.72	19940
167327	87.3742	8.32667e-17	7.15104	1.67616	27.814	3194.84	8.32667e-17	3.54902	8.81486	24.1838	6458.46	19934.2
162087	21.3948	1.40427	1.45761	1.67616	86.1585	4864.82	3.80288	8.32667e-17	1.50011	21.1657	5363.19	19805.5
168574	381.269	1.29127	17.1159	26.0858	194.512	4760.12	1.33789	1.80339	81.9709	191.682	6551.63	19768.1
39611	220.025	3.6925	5.72753	14.6941	132	5505.76	1.46921	5.2951	38.0775	72.472	7278.42	19497.9
166426	361.38	0.0353364	7.15104	9.8119	62.5429	4134.28	1.25767	8.32667e-17	21.9831	67.945	5826.23	19486.2
149229	433.559	1.22207	14.2688	32.5953	383.435	7772.85	0.0405159	5.2951	71.7292	473.86	7509.71	19454.6
163975	202.587	0.0353364	11.4217	24.4584	150.059	5662.78	1.25767	3.54902	51.2456	120.76	7109.08	19453.4
19371	1104.84	8.32667e-17	24.2338	8.18453	58.3755	5565.66	8.32667e-17	8.78774	14.6674	46.819	7285.23	19399.6
168410	528.421	8.32667e-17	11.4217	14.6941	116.72	5733.38	8.32667e-17	3.54902	36.6144	126.795	7279.88	19287.3
91803	351.046	2.41648	9.99812	30.9679	123.665	4330.09	0.0795823	5.2951	33.6881	122.269	6236.97	18989.1
164287	135.609	1.29127	4.30408	22.831	81.991	3366.31	1.33789	1.80339	43.93	176.592	5741.68	18922.4
89997	0.0883609	1.45295	1.45761	8.32667e-17	5.58742	4206.05	5.0359	1.80339	1.50011	1.54936	5553.89	18922.4
87165	22.8849	8.32667e-17	14.2688	8.18453	36.149	5019.08	8.32667e-17	3.54902	7.35175	10.6025	5061.09	18732.9
173510	25.5899	0.0353364	1.45761	1.67616	20.8682	3037.17	1.25767	8.32667e-17	4.42566	10.6025	4643.79	18555.1
105953	202.129	2.41648	5.72753	13.0667	112.552	4914.39	0.0795823	3.54902	48.3194	107.179	6192.58	18426.5
165834	209.049	1.40427	8.57457	16.3215	154.227	5738.61	3.80288	3.54902	54.1718	111.706	6966.82	18293.1
166928	38.6086	8.32667e-17	4.30408	1.67616	18.0898	3492.8	8.32667e-17	3.54902	1.50011	13.6206	5893.55	18164.5
23766	521.249	8.32667e-17	14.2688	32.5953	269.525	7431.3	8.32667e-17	21.0127	19.0568	217.334	5482.14	18157.5
100700	0.65574	1.29127	8.57457	3.30288	13.9223	3335.56	1.33789	7.04137	1.50011	1.54936	5366.28	18031.2
164453	463.828	2.56028	14.2688	16.3215	93.1042	5090.46	2.64968	1.80339	29.2988	73.9809	7325.65	17844
164015	394.032	0.0353364	12.8452	14.6941	138.946	4947.88	1.25767	1.80339	42.4669	102.652	6822.77	17828.8
154743	85.2889	2.41648	8.57457	3.30288	31.9815	6868.6	0.0795823	1.80339	4.42566	6.07552	6497.01	17764.5
162233	67.8045	8.32667e-17	4.30408	6.55721	115.331	5500.22	8.32667e-17	3.54902	8.81486	166.029	6603.5	17729.4
165492	387.639	0.0353364	2.88075	13.0667	106.996	3809.41	1.25767	7.04137	32.225	76.9989	5503.49	17696.6
45190	19.8588	2.41648	4.30408	8.18453	29.2032	4596.1	0.0795823	5.2951	10.278	22.6747	5726.22	17684.9
105494	1388.44	1.22207	19.9631	13.0667	79.2128	3038.72	0.0405159	1.80339	23.4462	76.9989	5195.3	17673.2
162792	136.228	0.0353364	5.72753	6.55721	59.7646	3717.41	1.25767	7.04137	11.7411	92.0888	5091.48	17631.1
46231	250.363	1.22207	8.57457	9.8119	109.774	4752.14	0.0405159	1.80339	45.3931	84.5439	6597.7	17583.2
162979	146.677	8.32667e-17	5.72753	3.30288	38.9273	3184.8	8.32667e-17	8.32667e-17	7.35175	19.6567	4467.76	17550.4
163028	247.773	1.22207	14.2688	13.0667	132	4540.33	0.0405159	5.2951	39.5406	131.322	6075.82	17441.7
98394	40.5337	8.32667e-17	2.88075	3.30288	20.8682	3984.84	8.32667e-17	1.80339	4.42566	6.07552	4912.79	17327
162442	366.742	1.35092	15.6924	17.9489	98.6608	4707.79	2.57129	3.54902	23.4462	95.1068	5437.64	17175
166951	205.681	1.29127	4.30408	16.3215	97.2717	4268.51	1.33789	3.54902	32.225	90.5798	5312.72	17094.3
28084	248.644	8.32667e-17	4.30408	16.3215	95.8825	4878.5	8.32667e-17	1.80339	29.2988	67.945	6324.01	17041.6
162660	51.6257	8.32667e-17	1.45761	3.30288	5.58742	2175.31	8.32667e-17	1.80339	5.88868	9.09348	2933.14	17018.2
162469	25.0856	1.22207	4.30408	1.67616	18.0898	3422.23	0.0405159	1.80339	1.50011	1.54936	3195.74	16323.5
167313	167.323	8.32667e-17	7.15104	13.0667	112.552	4807.62	8.32667e-17	8.32667e-17	46.8562	117.742	5458.02	16184.3
179280	328.178	2.49278	7.15104	3.30288	15.3115	2740.23	1.40718	8.32667e-17	2.96278	7.58448	4245.16	15815.9
96020	273.987	0.0353364	7.15104	3.30288	9.75482	1766.82	1.25767	8.32667e-17	4.42566	12.1115	2783.61	15717.6
40423	56.3236	0.0353364	2.88075	4.92996	15.3115	3211.59	1.25767	8.32667e-17	8.32667e-17	3.05786	4860.74	15690.7
18403	164.848	1.29127	8.57457	8.18453	91.7151	3688.07	1.33789	1.80339	45.3931	98.1248	4953.24	15688.4
164298	65.6505	1.35092	7.15104	9.8119	43.0948	3420.49	2.57129	7.04137	16.1305	54.364	4772.83	15655.6
161947	1588.55	0.0353364	17.1159	8.18453	13.9223	3459.92	1.25767	1.80339	4.42566	55.873	3820.33	15642.8
161946	1809.48	2.41648	12.8452	4.92996	22.2573	3373.49	0.0795823	8.32667e-17	1.50011	51.346	3946.27	15639.2
167423	9.69975	8.32667e-17	1.45761	1.67616	20.8682	3670.79	8.32667e-17	1.80339	2.96278	22.6747	5006.08	15622.9
23420	0.343618	8.32667e-17	15.6924	1.67616	2.80941	2089.05	8.32667e-17	3.54902	14.6674	4.56662	3248.67	15475.5
26281	336.404	2.49278	7.15104	9.8119	91.7151	4289.68	1.40718	3.54902	36.6144	131.322	5018.68	15442.7
144640	6.62473	8.32667e-17	1.45761	8.32667e-17	9.75482	1783.61	8.32667e-17	8.32667e-17	2.96278	3.05786	4421.62	15386.6
178285	0.906117	1.22207	1.45761	1.67616	33.3707	4941.77	0.0405159	8.32667e-17	1.50011	40.783	4823.91	15200.6
167108	200.25	0.102302	7.15104	13.0667	81.991	3790.45	3.71097	7.04137	39.5406	80.0169	4733.8	15192.4
172648	218.604	8.32667e-17	4.30408	9.8119	93.1042	4108.64	8.32667e-17	1.80339	11.7411	80.0169	4950.81	15171.4
89950	225.249	1.29127	8.57457	17.9489	98.6608	4415.03	1.33789	1.80339	29.2988	87.5619	5600.09	15055.6
157068	246.49	1.22207	5.72753	9.8119	45.8731	3390.95	0.0405159	3.54902	11.7411	40.783	4229.45	14963.2
167609	48.4861	8.32667e-17	4.30408	9.8119	65.3213	3631.93	8.32667e-17	3.54902	1.50011	27.2018	4428.81	14915.2
164055	218.26	1.35092	5.72753	16.3215	97.2717	4020.7	2.57129	3.54902	39.5406	104.161	4752.92	14811.1
165035	173.738	8.32667e-17	4.30408	6.55721	66.7104	3824.04	8.32667e-17	3.54902	11.7411	57.382	5479.11	14780.7
97840	22.1972	8.32667e-17	7.15104	13.0667	27.814	3024.54	8.32667e-17	7.04137	13.2042	21.1657	3458.25	14724.6
169175	220.002	1.22207	7.15104	9.8119	83.3802	3994.25	0.0405159	5.2951	38.0775	105.67	5113.35	14715.2
111957	1435.05	2.41648	14.2688	3.30288	12.5331	3012.41	0.0795823	3.54902	8.32667e-17	42.292	3232	14714.1
163286	219.108	0.0353364	14.2688	17.9489	26.4248	3164.84	1.25767	5.2951	17.5937	46.819	4466.39	14611.1
163905	97.9838	8.32667e-17	1.45761	16.3215	73.6562	3381.76	8.32667e-17	1.80339	24.9094	64.927	4485.53	14606.5
168833	26.4838	8.32667e-17	4.30408	3.30288	33.3707	3184.75	8.32667e-17	1.80339	7.35175	34.7469	4358.01	14602.9
164382	84.2807	0.0353364	1.45761	1.67616	22.2573	3062.46	1.25767	1.80339	8.32667e-17	7.58448	4674.98	14550.3
91931	271.764	1.22207	1.45761	14.6941	109.774	4352.52	0.0405159	10.5341	24.9094	110.197	5698.98	14516.4
89811	0.158064	2.41648	5.72753	1.67616	19.479	3685.31	0.0795823	1.80339	8.32667e-17	27.2018	4721.53	14481.3
163756	489.147	0.0353364	8.57457	22.831	80.6019	3673.25	1.25767	8.78774	35.1513	105.67	4556.21	14348
118721	103.896	0.0353364	4.30408	3.30288	41.7056	4078.73	1.25767	3.54902	1.50011	73.9809	3792.29	14280.1
167330	19.2398	0.0353364	2.88075	8.32667e-17	118.109	3949.68	1.25767	8.32667e-17	2.96278	108.688	3862.67	14218.1
32404	1002.39	0.0694155	17.1159	16.3215	27.814	3417.27	2.4828	1.80339	24.9094	24.1838	3725.46	14137.4
124021	918.046	2.49278	4.30408	11.4393	59.7646	3742.3	1.40718	3.54902	19.0568	83.0349	4267.65	14055.6
102110	159.853	1.29127	2.88075	24.4584	88.9368	3849.2	1.33789	3.54902	36.6144	80.0169	5148.48	14009.9
163397	219.887	0.0353364	8.57457	6.55721	30.5923	2979.9	1.25767	1.80339	17.5937	48.328	4535.34	13967.8
164050	162.556	1.22207	4.30408	14.6941	101.439	3693.37	0.0405159	3.54902	27.8356	73.9809	4903.11	13888.3
110658	64.2297	1.22207	8.32667e-17	19.5762	68.0996	3783.59	0.0405159	1.80339	24.9094	69.454	4332.71	13850.9
163780	264.34	8.32667e-17	1.45761	3.30288	88.9368	3976.96	8.32667e-17	8.32667e-17	17.5937	83.0349	5149.92	13787.7
42842	104.079	8.32667e-17	1.45761	8.32667e-17	8.36567	1986.59	8.32667e-17	8.32667e-17	1.50011	1.54936	3205.19	13777.2
167100	1.41027	8.32667e-17	2.88075	8.32667e-17	8.36567	1372.13	8.32667e-17	8.32667e-17	1.50011	1.54936	3422.41	13577.2
41325	25.7962	8.32667e-17	1.45761	3.30288	27.814	1647.69	8.32667e-17	8.32667e-17	1.50011	6.07552	3864.53	13539.7
162924	13.8285	8.32667e-17	1.45761	8.32667e-17	23.6465	2863.56	8.32667e-17	5.2951	2.96278	30.2199	3486.56	13485.9
107003	4.94867	8.32667e-17	2.88075	8.32667e-17	58.3755	3665.66	8.32667e-17	3.54902	4.42566	3.05786	5476.29	13440.3
169114	366.605	8.32667e-17	12.8452	4.92996	59.7646	3269.53	8.32667e-17	3.54902	2.96278	13.6206	3673.86	13110.5
162689	85.4264	1.22207	5.72753	6.55721	73.6562	2943.71	0.0405159	3.54902	7.35175	55.873	4015.01	13027.4
161427	93.5612	1.22207	9.99812	19.5762	75.0453	1969.68	0.0405159	7.04137	27.8356	43.801	3921.86	13002.9
167160	138.611	8.32667e-17	2.88075	3.30288	98.6608	3388.36	8.32667e-17	3.54902	16.1305	83.0349	4367.66	12925.7
145710	259.482	1.29127	5.72753	16.3215	106.996	4513.53	1.33789	1.80339	27.8356	67.945	5598.79	12914
20753	17.3139	8.32667e-17	4.30408	3.30288	5.58742	783.596	8.32667e-17	3.54902	8.32667e-17	6.07552	2054.35	12903.5
164009	383.171	0.102302	9.99812	13.0667	102.828	3751.95	3.71097	1.80339	24.9094	70.963	4950.58	12830.9
135723	129.697	1.35092	8.57457	4.92996	95.8825	3046.2	2.57129	3.54902	20.5199	95.1068	4061.17	12826.3
169431	255.633	0.0353364	5.72753	11.4393	40.3165	2795.61	1.25767	1.80339	7.35175	9.09348	3363.21	12778.3
166173	61.2277	1.29127	2.88075	3.30288	22.2573	1819.09	1.33789	8.32667e-17	2.96278	3.05786	3412.24	12696.4
164344	4.53526	1.29127	1.45761	4.92996	50.0406	4061.85	1.33789	1.80339	5.88868	18.1477	4526.66	12692.9
85587	156.118	1.29127	4.30408	16.3215	134.779	3991.6	1.33789	1.80339	36.6144	92.0888	5135.03	12639.1
163941	323.297	8.32667e-17	8.57457	6.55721	79.2128	2568.63	8.32667e-17	1.80339	19.0568	92.0888	4364.23	12580.6
163614	735.768	1.22207	9.99812	14.6941	65.3213	3306.86	0.0405159	8.78774	26.3725	86.0529	3794.47	12551.4
164773	120.578	0.102302	8.57457	4.92996	65.3213	4610.97	3.71097	1.80339	11.7411	30.2199	6348.26	12502.3
165887	126.879	0.0353364	5.72753	17.9489	75.0453	2966.24	1.25767	5.2951	27.8356	76.9989	3864.64	12476.5
153534	200.021	0.0353364	7.15104	1.67616	45.8731	3411.97	1.25767	3.54902	7.35175	55.873	3752.55	12466
167716	135.609	8.32667e-17	4.30408	4.92996	69.4887	2786.62	8.32667e-17	8.32667e-17	21.9831	57.382	3891.58	12464.8
40911	124.404	8.32667e-17	4.30408	11.4393	45.8731	2913.09	8.32667e-17	8.32667e-17	14.6674	55.873	3994.66	12400.5
18855	4.5123	1.22207	5.72753	3.30288	18.0898	4047.73	0.0405159	5.2951	4.42566	15.1296	5716.41	12380.6
132758	11.0074	8.32667e-17	8.32667e-17	4.92996	12.5331	3055.03	8.32667e-17	1.80339	1.50011	8.32667e-17	3284.87	12373.6
167455	148.052	8.32667e-17	9.99812	11.4393	98.6608	3114.01	8.32667e-17	7.04137	27.8356	83.0349	3966.38	12283.6
169560	241.862	0.102302	4.30408	6.55721	109.774	3388.28	3.71097	3.54902	32.225	66.436	4219.97	12263.7
35885	126.833	1.29127	5.72753	8.18453	102.828	3295.05	1.33789	8.78774	30.7619	81.5259	4083.05	12225.1
87823	8.94262	1.22207	1.45761	8.32667e-17	63.9321	3645.45	0.0405159	1.80339	8.32667e-17	8.32667e-17	4877.33	12153.7
164772	491.347	0.0353364	8.57457	6.55721	31.9815	2746.79	1.25767	3.54902	14.6674	51.346	4054.13	12122.1
169377	90.5135	8.32667e-17	2.88075	4.92996	45.8731	2841.15	8.32667e-17	8.32667e-17	2.96278	31.7289	3846.92	12121
38478	0.279302	1.22207	8.32667e-17	8.32667e-17	15.3115	941.015	0.0405159	8.32667e-17	8.32667e-17	1.54936	3034.11	12094.1
169319	257.374	2.49278	11.4217	14.6941	70.8779	3277.92	1.40718	1.80339	24.9094	54.364	4398.74	12049.6
124776	149.404	2.49278	2.88075	13.0667	112.552	3450.91	1.40718	5.2951	19.0568	93.5978	4374.48	11980.6
169151	126.673	1.22207	9.99812	11.4393	63.9321	2889.1	0.0405159	5.2951	14.6674	51.346	3922.83	11965.4
164152	18.254	2.56028	4.30408	8.32667e-17	12.5331	2000.16	2.64968	8.32667e-17	8.32667e-17	3.05786	3665.83	11942
91125	0.158064	4.81259	1.45761	1.67616	66.7104	4785.92	0.153672	3.54902	1.50011	1.54936	8402.98	11822.7
56731	158.432	1.22207	2.88075	24.4584	88.9368	3829.25	0.0405159	7.04137	32.225	120.76	5185.06	11730.3
164872	335.098	0.0353364	5.72753	16.3215	129.222	2630.88	1.25767	3.54902	52.7087	199.226	3784.39	11695.2
165543	0.0883609	8.32667e-17	4.30408	1.67616	6.97653	2159.82	8.32667e-17	1.80339	2.96278	1.54936	3684.99	11677.7
165290	1.89269	0.0694155	8.32667e-17	9.8119	12.5331	2138.44	2.4828	8.32667e-17	1.50011	9.09348	3523.74	11636.7
96658	15.7088	0.0353364	1.45761	1.67616	56.9863	3125.78	1.25767	1.80339	5.88868	57.382	3614.13	11599.3
138458	4.55823	8.32667e-17	2.88075	8.32667e-17	19.479	1641.05	8.32667e-17	1.80339	4.42566	4.56662	3880.78	11563.1
166902	247.613	1.22207	8.57457	4.92996	70.8779	3422.57	0.0405159	8.32667e-17	14.6674	61.909	3687.53	11471.8
162210	36.3854	0.0353364	2.88075	8.32667e-17	25.0357	2142.39	1.25767	1.80339	4.42566	4.56662	3453.3	11457.8
166926	12.7735	0.0353364	4.30408	8.32667e-17	22.2573	3741.04	1.25767	1.80339	8.32667e-17	9.09348	4404.5	11420.4
160631	14.1495	1.22207	4.30408	3.30288	38.9273	3468.81	0.0405159	1.80339	1.50011	33.2379	3199.84	11388.8
38216	150.71	1.35092	4.30408	6.55721	56.9863	2991.62	2.57129	7.04137	11.7411	52.855	4025.89	11385.3
164082	51.7632	2.41648	8.32667e-17	4.92996	38.9273	1363.01	0.0795823	8.32667e-17	11.7411	61.909	3910.17	11143.2
20167	910.118	0.0353364	21.3867	30.9679	150.059	4324.05	1.25767	8.78774	52.7087	164.52	4541.72	11140.8
175781	135.334	3.61329	5.72753	6.55721	72.267	3379.05	0.117277	1.80339	14.6674	69.454	4377.13	11069.5
42775	54.4216	8.32667e-17	2.88075	1.67616	15.3115	1620.67	8.32667e-17	8.32667e-17	8.32667e-17	1.54936	3025.86	10922.1
164286	254.327	0.0353364	7.15104	3.30288	43.0948	3224.86	1.25767	8.32667e-17	4.42566	24.1838	4767.25	10882.3
174629	254.625	8.32667e-17	8.57457	1.67616	47.2623	3199.15	8.32667e-17	3.54902	17.5937	33.2379	3923.1	10814.5
167729	323.366	0.0353364	8.32667e-17	3.30288	40.3165	3056.7	1.25767	8.32667e-17	8.81486	28.7108	3817.3	10805.1
32906	122.731	8.32667e-17	7.15104	1.67616	48.6514	2783.51	8.32667e-17	3.54902	7.35175	43.801	3177.61	10767.7
164611	20.3173	1.29127	1.45761	3.30288	41.7056	1723.02	1.33789	8.32667e-17	13.2042	18.1477	2920.36	10712.7
160223	148.602	8.32667e-17	4.30408	9.8119	80.6019	2532.19	8.32667e-17	3.54902	21.9831	98.1248	3404.95	10663.6
163750	272.085	0.0694155	2.88075	14.6941	52.8189	2820.91	2.4828	8.32667e-17	20.5199	43.801	3383.56	10604
169414	96.8609	8.32667e-17	1.45761	3.30288	51.4297	3586.57	8.32667e-17	8.32667e-17	4.42566	19.6567	4221.47	10518.6
168841	93.6758	1.22207	5.72753	8.32667e-17	25.0357	2033.28	0.0405159	1.80339	13.2042	49.837	3420.65	10450.7
166685	33.7956	1.22207	1.45761	3.30288	70.8779	4085.08	0.0405159	1.80339	2.96278	12.1115	3333.01	10447.2
165803	468.204	1.22207	8.57457	4.92996	23.6465	2244.77	0.0405159	8.32667e-17	4.42566	16.6386	3340.97	10336.1
119911	2.65117	1.29127	1.45761	8.32667e-17	2.80941	1676.27	1.33789	5.2951	1.50011	1.54936	2646.67	10327.9
167612	284.413	8.32667e-17	1.45761	11.4393	105.607	2039.66	8.32667e-17	1.80339	43.93	141.885	2995.29	10288.1
162520	136.228	1.22207	1.45761	6.55721	62.5429	3100.69	0.0405159	3.54902	29.2988	58.891	3948.76	10104.5
133905	887.204	8.32667e-17	18.5395	8.32667e-17	19.479	2412.39	8.32667e-17	8.32667e-17	1.50011	16.6386	3318.13	10098.7
86320	259.826	1.22207	11.4217	11.4393	97.2717	3733.34	0.0405159	8.32667e-17	17.5937	63.418	4991.21	10058.9
166848	238.47	0.0694155	2.88075	8.18453	38.9273	2677.35	2.4828	1.80339	13.2042	24.1838	3611.02	10033.2
161297	210.951	8.32667e-17	8.57457	13.0667	73.6562	3524.37	8.32667e-17	8.32667e-17	24.9094	57.382	4942.28	10021.5
166039	114.597	1.22207	1.45761	17.9489	79.2128	2866.57	0.0405159	1.80339	16.1305	48.328	4092.17	10002.8
168768	122.044	1.29127	8.57457	13.0667	56.9863	2853.03	1.33789	5.2951	30.7619	80.0169	3680.28	9959.48
117992	83.7536	8.32667e-17	1.45761	4.92996	31.9815	1644	8.32667e-17	8.32667e-17	1.50011	9.09348	2243.03	9958.31
101461	27.4007	8.32667e-17	5.72753	1.67616	26.4248	2392.09	8.32667e-17	1.80339	8.32667e-17	42.292	2838.57	9933.75
182707	100.619	0.0353364	2.88075	17.9489	38.9273	2883.44	1.25767	5.2951	2.96278	13.6206	3371.42	9885.79
183936	287.3	8.32667e-17	7.15104	19.5762	101.439	2343.28	8.32667e-17	5.2951	30.7619	107.179	3438.62	9760.64
103699	185.86	8.32667e-17	8.57457	9.8119	70.8779	2864.8	8.32667e-17	8.32667e-17	30.7619	101.143	3356.5	9729.06
170316	120.28	8.32667e-17	7.15104	1.67616	29.2032	2448.11	8.32667e-17	1.80339	5.88868	27.2018	3025.56	9720.87
139052	45.9881	1.22207	4.30408	1.67616	13.9223	3196.01	0.0405159	1.80339	2.96278	6.07552	3195.57	9703.33
171428	12.3836	2.41648	8.32667e-17	8.32667e-17	48.6514	2185.17	0.0795823	8.32667e-17	1.50011	10.6025	3828.63	9698.65
168565	10.8238	8.32667e-17	1.45761	4.92996	41.7056	2625.01	8.32667e-17	8.32667e-17	5.88868	49.837	2952.59	9665.9
167165	197.454	1.22207	4.30408	13.0667	106.996	3606.59	0.0405159	8.78774	27.8356	64.927	4333.94	9631.98
165964	43.8568	8.32667e-17	2.88075	1.67616	9.75482	1532.4	8.32667e-17	1.80339	8.32667e-17	6.07552	2364.73	9560.63
167130	178.688	1.29127	2.88075	19.5762	81.991	3232.21	1.33789	1.80339	26.3725	72.472	3585.77	9533.73
165287	57.4924	8.32667e-17	1.45761	1.67616	9.75482	1657.41	8.32667e-17	8.32667e-17	8.32667e-17	1.54936	2356.81	9531.39
164775	66.1088	8.32667e-17	5.72753	4.92996	30.5923	1508.33	8.32667e-17	1.80339	5.88868	15.1296	2213.02	9503.32
92519	2.88101	8.32667e-17	1.45761	8.32667e-17	11.144	1335.36	8.32667e-17	8.32667e-17	1.50011	1.54936	2113.85	9498.64
162756	98.0296	8.32667e-17	4.30408	11.4393	72.267	2722.28	8.32667e-17	8.32667e-17	29.2988	63.418	3140.98	9421.45
20159	129.491	8.32667e-17	7.15104	4.92996	70.8779	2400.48	8.32667e-17	8.78774	20.5199	63.418	3411.59	9401.56
109891	1.63993	8.32667e-17	4.30408	3.30288	12.5331	1059.42	8.32667e-17	8.32667e-17	5.88868	3.05786	3108.87	9355.95
180822	0.65574	8.32667e-17	8.32667e-17	3.30288	9.75482	2189.96	8.32667e-17	3.54902	1.50011	12.1115	2957.54	9306.82
98745	111.251	0.0353364	1.45761	19.5762	69.4887	3556.14	1.25767	1.80339	27.8356	57.382	4575.09	9222.61
100692	137.236	2.41648	7.15104	3.30288	22.2573	2004.84	0.0795823	1.80339	5.88868	22.6747	2686.41	9186.35
39497	288.308	8.32667e-17	7.15104	8.32667e-17	15.3115	1997.1	8.32667e-17	8.32667e-17	2.96278	10.6025	2997.94	9116.17
110425	118.951	0.0353364	2.88075	4.92996	37.5381	2595.93	1.25767	5.2951	11.7411	42.292	3209.94	9113.83
166940	135.518	1.35092	4.30408	17.9489	80.6019	2917.03	2.57129	1.80339	19.0568	64.927	3893.05	9082.25
151991	9.90623	8.32667e-17	8.32667e-17	8.32667e-17	8.36567	1240.88	8.32667e-17	8.32667e-17	2.96278	9.09348	2028.36	9062.37
93425	33.5664	8.32667e-17	2.88075	3.30288	66.7104	2877.27	8.32667e-17	8.32667e-17	1.50011	7.58448	2350.07	9041.31
41184	182.056	1.22207	4.30408	14.6941	63.9321	2778.43	0.0405159	1.80339	24.9094	66.436	3536.61	9040.14
166186	23.1142	8.32667e-17	2.88075	8.32667e-17	4.19837	1275.67	8.32667e-17	1.80339	2.96278	6.07552	2270.83	9016.75
158798	192.895	1.22207	7.15104	22.831	79.2128	3695.78	0.0405159	8.32667e-17	29.2988	83.0349	4377.37	9013.24
177123	0.0344779	8.32667e-17	1.45761	8.32667e-17	19.479	2179.45	8.32667e-17	8.32667e-17	1.50011	3.05786	3134.98	9013.24
168710	91.4301	8.32667e-17	2.88075	6.55721	61.1538	2520.06	8.32667e-17	1.80339	38.0775	66.436	3174.64	8994.53
162193	72.7085	8.32667e-17	5.72753	4.92996	19.479	2305.49	8.32667e-17	8.32667e-17	7.35175	19.6567	2684.06	8957.1
30188	113.176	8.32667e-17	5.72753	13.0667	31.9815	3242.57	8.32667e-17	5.2951	16.1305	78.5079	3172.58	8944.23
164814	662.329	0.0353364	4.30408	24.4584	133.389	4098.32	1.25767	12.2806	23.4462	84.5439	3238.18	8822.59
162899	64.7109	8.32667e-17	4.30408	6.55721	6.97653	1384.65	8.32667e-17	8.32667e-17	4.42566	12.1115	2210.09	8807.39
163157	130.522	8.32667e-17	1.45761	1.67616	48.6514	2385.58	8.32667e-17	3.54902	8.81486	28.7108	3026.85	8805.05
154467	115.972	0.0353364	2.88075	4.92996	47.2623	2333.85	1.25767	3.54902	19.0568	46.819	3255.73	8755.92
167438	83.8911	8.32667e-17	2.88075	13.0667	56.9863	2380.36	8.32667e-17	8.32667e-17	14.6674	61.909	3162.3	8686.91
169170	53.1382	8.32667e-17	1.45761	1.67616	34.7598	1854.3	8.32667e-17	5.2951	2.96278	25.6928	2416.68	8627.26
163642	126.925	8.32667e-17	4.30408	11.4393	69.4887	2473.77	8.32667e-17	1.80339	20.5199	49.837	3594.56	8621.41
168549	87.3513	8.32667e-17	4.30408	6.55721	22.2573	1636.14	8.32667e-17	3.54902	21.9831	31.7289	2373.03	8608.55
162504	87.4429	1.22207	4.30408	8.32667e-17	31.9815	1727.92	0.0405159	8.32667e-17	8.81486	16.6386	2385.35	8596.85
163078	19.194	8.32667e-17	2.88075	3.30288	33.3707	2006.39	8.32667e-17	1.80339	5.88868	33.2379	2965.44	8551.24
154392	2.78907	8.32667e-17	8.32667e-17	8.32667e-17	34.7598	2500.31	8.32667e-17	1.80339	8.32667e-17	1.54936	3478.08	8513.81
122269	61.8006	8.32667e-17	4.30408	4.92996	19.479	1676.27	8.32667e-17	1.80339	4.42566	15.1296	2652.09	8486.91
167831	83.2036	8.32667e-17	8.32667e-17	8.32667e-17	31.9815	1771.91	8.32667e-17	1.80339	8.81486	22.6747	2491.06	8483.4
86594	99.7711	8.32667e-17	7.15104	3.30288	38.9273	2067.38	8.32667e-17	1.80339	13.2042	42.292	2700.03	8436.61
97742	20.2256	8.32667e-17	2.88075	1.67616	23.6465	2074.14	8.32667e-17	1.80339	2.96278	21.1657	2836.85	8423.75
165569	109.349	1.22207	4.30408	1.67616	19.479	1761.56	0.0405159	1.80339	14.6674	24.1838	2877.06	8359.42
165349	129.239	8.32667e-17	5.72753	3.30288	68.0996	2273.41	8.32667e-17	1.80339	24.9094	48.328	2510.66	8352.4
166574	20.5695	8.32667e-17	2.88075	1.67616	8.32667e-17	1207.97	8.32667e-17	1.80339	1.50011	1.54936	2422.38	8337.19
162231	145.898	1.22207	2.88075	3.30288	48.6514	2175.39	0.0405159	8.32667e-17	16.1305	64.927	3037.45	8272.86
77830	6.53291	0.0353364	5.72753	1.67616	11.144	2799.29	1.25767	8.32667e-17	4.42566	28.7108	2933.79	8250.64
170392	23.3663	8.32667e-17	8.32667e-17	8.32667e-17	4.19837	992.01	8.32667e-17	1.80339	4.42566	15.1296	1757.01	8207.36
36262	40.9921	1.22207	1.45761	3.30288	41.7056	2724.77	0.0405159	8.32667e-17	2.96278	19.6567	2917.47	8141.86
166568	108.066	1.35092	2.88075	1.67616	54.208	2226.89	2.57129	8.32667e-17	14.6674	40.783	2566.13	8130.17
165057	2.74311	8.32667e-17	8.32667e-17	1.67616	1.42063	1698.69	8.32667e-17	1.80339	8.32667e-17	15.1296	2420.52	8113.79
156639	1.24962	8.32667e-17	1.45761	6.55721	6.97653	714.072	8.32667e-17	8.32667e-17	1.50011	3.05786	1572.11	8109.11
169279	250.179	8.32667e-17	4.30408	8.32667e-17	48.6514	2228.1	8.32667e-17	1.80339	7.35175	42.292	2433.41	8105.6
162853	36.5	1.29127	1.45761	4.92996	44.4839	3128.91	1.33789	1.80339	1.50011	30.2199	2511.45	8097.42
98919	207.582	8.32667e-17	5.72753	8.18453	54.208	2184.25	8.32667e-17	1.80339	10.278	54.364	2480.76	8062.33
26659	67.0483	8.32667e-17	4.30408	9.8119	33.3707	1528.28	8.32667e-17	1.80339	8.81486	52.855	2223.88	8045.95
165002	90.8114	2.41648	7.15104	4.92996	55.5972	1886.56	0.0795823	1.80339	16.1305	52.855	2825.77	8021.39
155266	93.4008	1.29127	8.57457	9.8119	76.4345	2522.89	1.33789	1.80339	20.5199	60.4	3430.69	7959.4
163920	14.6999	8.32667e-17	2.88075	1.67616	16.7007	1575.09	8.32667e-17	1.80339	2.96278	9.09348	2525.97	7947.7
182484	58.2944	8.32667e-17	2.88075	8.32667e-17	15.3115	1405.69	8.32667e-17	1.80339	2.96278	4.56662	1971.81	7902.09
164035	82.6537	8.32667e-17	1.45761	9.8119	55.5972	2056.97	8.32667e-17	3.54902	14.6674	33.2379	3007.5	7898.58
162574	9.24089	8.32667e-17	8.32667e-17	8.32667e-17	5.58742	636.069	8.32667e-17	8.32667e-17	8.32667e-17	3.05786	2086.41	7883.37
163136	79.1018	8.32667e-17	1.45761	11.4393	61.1538	1971.55	8.32667e-17	3.54902	17.5937	49.837	2641.67	7881.03
169261	41.7025	1.29127	7.15104	8.32667e-17	9.75482	1900.74	1.33789	7.04137	1.50011	4.56662	2290.8	7879.86
161950	546.638	8.32667e-17	5.72753	6.55721	29.2032	2136.27	8.32667e-17	8.32667e-17	8.81486	31.7289	2381.84	7868.17
166792	110.77	1.22207	4.30408	6.55721	45.8731	2413.44	0.0405159	3.54902	10.278	48.328	2925.28	7816.7
177891	37.348	1.35092	2.88075	4.92996	48.6514	2473.04	2.57129	8.32667e-17	7.35175	31.7289	2602.97	7792.14
167861	153.001	8.32667e-17	1.45761	1.67616	44.4839	1955.44	8.32667e-17	3.54902	13.2042	31.7289	2466.93	7792.14
168222	214.067	8.32667e-17	4.30408	8.18453	52.8189	1901.16	8.32667e-17	1.80339	27.8356	57.382	2781.09	7786.29
101642	139.115	1.22207	4.30408	6.55721	29.2032	2020.66	0.0405159	1.80339	2.96278	16.6386	2514.42	7779.28
164201	116.911	2.41648	4.30408	3.30288	27.814	1962.1	0.0795823	3.54902	10.278	21.1657	2473.71	7774.6
167881	111.618	1.29127	1.45761	4.92996	34.7598	1548.36	1.33789	1.80339	1.50011	15.1296	2363.4	7738.34
88393	3.89207	8.32667e-17	2.88075	8.32667e-17	15.3115	4470.62	8.32667e-17	1.80339	8.32667e-17	3.05786	2795.38	7732.49
93976	168.766	8.32667e-17	4.30408	11.4393	77.8236	3119.36	8.32667e-17	1.80339	29.2988	51.346	4019.23	7691.55
162001	103.896	1.22207	2.88075	3.30288	30.5923	1917.94	0.0405159	8.32667e-17	11.7411	22.6747	2197.38	7662.31
167066	1521.11	0.0353364	8.57457	6.55721	45.8731	2042.88	1.25767	1.80339	20.5199	86.0529	2121.71	7634.24
91583	37.2793	1.22207	8.32667e-17	6.55721	6.97653	1425.77	0.0405159	1.80339	1.50011	9.09348	2097.77	7615.53
166814	119.798	8.32667e-17	8.32667e-17	4.92996	54.208	1888.92	8.32667e-17	8.32667e-17	14.6674	49.837	2447.88	7592.13
21093	0.177248	8.32667e-17	8.32667e-17	8.32667e-17	2.80941	1167.87	8.32667e-17	8.32667e-17	8.32667e-17	8.32667e-17	2156.85	7545.35
36944	3.82314	8.32667e-17	4.30408	4.92996	20.8682	2764.49	8.32667e-17	1.80339	2.96278	15.1296	2684.52	7510.26
46874	38.6315	8.32667e-17	1.45761	8.32667e-17	20.8682	1430.47	8.32667e-17	8.32667e-17	8.32667e-17	6.07552	1588.72	7475.17
44772	46.2402	8.32667e-17	1.45761	3.30288	30.5923	2495.68	8.32667e-17	1.80339	10.278	60.4	2626.02	7470.49
162978	144.088	1.22207	2.88075	13.0667	66.7104	3085.95	0.0405159	1.80339	8.81486	52.855	3763.13	7445.93
162536	55.6361	8.32667e-17	1.45761	8.18453	33.3707	1461.48	8.32667e-17	1.80339	10.278	21.1657	1916.39	7436.57
142403	1.52508	0.0353364	8.32667e-17	3.30288	23.6465	2068.48	1.25767	1.80339	8.32667e-17	6.07552	2444.05	7430.72
169661	136.847	0.0353364	4.30408	8.18453	41.7056	1707.86	1.25767	8.32667e-17	20.5199	36.2559	2267.5	7417.86
167476	521.685	8.32667e-17	11.4217	4.92996	147.281	2644.43	8.32667e-17	8.32667e-17	7.35175	93.5978	2355.29	7399.14
158795	31.3202	1.29127	4.30408	3.30288	9.75482	1173.06	1.33789	8.32667e-17	4.42566	18.1477	2009.26	7362.88
168659	1383.54	1.22207	14.2688	4.92996	4.19837	818.068	0.0405159	1.80339	1.50011	21.1657	1940.69	7347.68
167845	493.615	0.0353364	7.15104	1.67616	27.814	1750.57	1.25767	1.80339	2.96278	19.6567	2432.79	7332.47
166221	116.27	0.0353364	5.72753	1.67616	47.2623	1831.71	1.25767	8.32667e-17	13.2042	45.31	2431.55	7326.63
29919	77.177	1.22207	1.45761	9.8119	47.2623	2079.38	0.0405159	8.32667e-17	19.0568	54.364	2739.33	7295.05
162274	182.79	0.0353364	1.45761	14.6941	91.7151	2180.54	1.25767	3.54902	23.4462	78.5079	2807.18	7293.88
54007	12.5441	8.32667e-17	2.88075	8.32667e-17	11.144	1698.63	8.32667e-17	1.80339	4.42566	9.09348	2347.39	7270.48
165763	229.832	0.0353364	1.45761	11.4393	18.0898	3702.62	1.25767	7.04137	11.7411	9.09348	2696.07	7256.45
165152	126.146	0.0353364	8.32667e-17	9.8119	56.9863	2279.08	1.25767	8.32667e-17	13.2042	54.364	2938.68	7216.68
171863	110.724	8.32667e-17	1.45761	6.55721	38.9273	1694.59	8.32667e-17	8.32667e-17	16.1305	31.7289	2297.28	7187.44
162843	81.1413	8.32667e-17	4.30408	9.8119	26.4248	1915.46	8.32667e-17	3.54902	17.5937	43.801	2388.33	7178.08
164309	248.186	1.22207	2.88075	8.18453	40.3165	1763.86	0.0405159	3.54902	24.9094	75.4899	2415.2	7173.4
165677	287.896	1.35092	11.4217	11.4393	73.6562	1924.68	2.57129	8.32667e-17	16.1305	52.855	2294.89	7141.82
167931	102.2	0.0694155	1.45761	6.55721	33.3707	1428.57	2.4828	1.80339	14.6674	30.2199	2244.02	7123.11
167546	61.136	8.32667e-17	8.32667e-17	8.18453	25.0357	1646.6	8.32667e-17	8.32667e-17	10.278	28.7108	2184.8	7121.94
85392	1109.12	8.32667e-17	8.57457	6.55721	147.281	1986.2	8.32667e-17	3.54902	41.0038	164.52	2664.71	7110.24
163236	51.0757	1.22207	4.30408	4.92996	23.6465	1711.81	0.0405159	8.32667e-17	2.96278	31.7289	2228.24	7064.63
165547	310.237	8.32667e-17	4.30408	9.8119	38.9273	1726.36	8.32667e-17	1.80339	8.81486	43.801	2141.59	7052.93
163639	18.4144	1.22207	4.30408	1.67616	16.7007	2215.71	0.0405159	8.32667e-17	8.32667e-17	4.56662	2029.83	7043.57
162798	124.175	2.41648	1.45761	8.18453	58.3755	2638.7	0.0795823	8.32667e-17	11.7411	63.418	3503.96	7038.89
168388	80.5684	0.0353364	5.72753	3.30288	56.9863	1420.47	1.25767	8.32667e-17	14.6674	73.9809	2116.72	7031.88
162654	0.453532	8.32667e-17	2.88075	8.32667e-17	11.144	2568.53	8.32667e-17	1.80339	1.50011	6.07552	2288.85	7023.69
168389	135.541	0.0353364	4.30408	8.18453	37.5381	1969.94	1.25767	8.32667e-17	24.9094	28.7108	2323.39	6992.11
169096	67.2546	8.32667e-17	1.45761	6.55721	1.42063	1146.68	8.32667e-17	8.32667e-17	4.42566	6.07552	2251.6	6985.09
105844	548.883	8.32667e-17	9.99812	1.67616	22.2573	1398.3	8.32667e-17	8.32667e-17	8.32667e-17	4.56662	1412.71	6967.55
96759	49.5174	8.32667e-17	2.88075	3.30288	16.7007	1835.17	8.32667e-17	1.80339	10.278	22.6747	1923.74	6944.15
90451	77.7728	0.0353364	1.45761	8.32667e-17	31.9815	1984.88	1.25767	8.32667e-17	8.32667e-17	8.32667e-17	2670.13	6910.23
171889	48.2569	3.61329	2.88075	9.8119	15.3115	1825.15	0.117277	8.32667e-17	7.35175	25.6928	2539.89	6896.2
167535	138.84	8.32667e-17	1.45761	3.30288	30.5923	1682.64	8.32667e-17	8.32667e-17	7.35175	24.1838	2313.51	6879.82
112692	365.138	1.22207	1.45761	6.55721	16.7007	1519.97	0.0405159	8.32667e-17	5.88868	22.6747	1909.72	6864.62
173831	12.7735	0.0353364	8.32667e-17	3.30288	12.5331	2039.07	1.25767	8.32667e-17	1.50011	3.05786	2288.27	6847.07
166449	75.7791	8.32667e-17	1.45761	8.32667e-17	43.0948	1875.65	8.32667e-17	8.32667e-17	11.7411	36.2559	2492.56	6826.02
174368	17.3827	8.32667e-17	1.45761	4.92996	5.58742	1029.13	8.32667e-17	8.32667e-17	8.32667e-17	1.54936	1673.17	6813.15
169643	27.2632	1978.44	3355.3	2509.35	3260.34	3715.79	3110.01	6115.57	6289.88	4783.49	4460.03	6810.82
165005	107.035	8.32667e-17	1.45761	1.67616	12.5331	1030.56	8.32667e-17	1.80339	1.50011	12.1115	1759.81	6767.54
163722	193.215	8.32667e-17	2.88075	4.92996	44.4839	2359.92	8.32667e-17	1.80339	8.81486	19.6567	2559.51	6747.65
165995	262.232	8.32667e-17	2.88075	17.9489	69.4887	1702.46	8.32667e-17	1.80339	11.7411	45.31	2186.24	6747.65
111946	435.987	8.32667e-17	5.72753	6.55721	13.9223	1784.89	8.32667e-17	1.80339	13.2042	33.2379	2152.51	6735.96
19195	18.6896	1.22207	1.45761	1.67616	13.9223	1899.48	0.0405159	8.32667e-17	1.50011	6.07552	2367.99	6735.96
100153	3.59338	1.22207	1.45761	1.67616	50.0406	2267.73	0.0405159	1.80339	5.88868	43.801	2155.83	6730.11
124398	4.09882	8.32667e-17	1.45761	1.67616	6.97653	1403.34	8.32667e-17	8.32667e-17	8.32667e-17	8.32667e-17	2283.25	6718.41
169145	42.9401	8.32667e-17	8.32667e-17	1.67616	50.0406	2160.97	8.32667e-17	1.80339	4.42566	40.783	1871.35	6703.21
169239	4.21368	1.22207	2.88075	3.30288	11.144	1473.45	0.0405159	8.32667e-17	8.32667e-17	7.58448	1923.18	6680.99
164381	0.139471	8.32667e-17	1.45761	1.67616	1.42063	1316.38	8.32667e-17	8.32667e-17	1.50011	4.56662	1773.97	6641.22
168379	86.1368	0.0353364	8.32667e-17	6.55721	40.3165	2063.4	1.25767	8.32667e-17	5.88868	43.801	2720.35	6636.54
120466	86.1826	8.32667e-17	2.88075	8.18453	27.814	2201.82	8.32667e-17	8.32667e-17	23.4462	36.2559	2800.43	6634.2
42481	29.7616	8.32667e-17	8.32667e-17	4.92996	29.2032	955.758	8.32667e-17	1.80339	2.96278	6.07552	1457.76	6573.38
165325	297.359	0.0353364	7.15104	8.18453	45.8731	1801.14	1.25767	1.80339	11.7411	30.2199	2458.59	6562.85
162214	30.2659	0.0353364	2.88075	3.30288	22.2573	1715.15	1.25767	3.54902	4.42566	37.7649	1674.46	6558.17
162704	2.3064	8.32667e-17	8.32667e-17	3.30288	4.19837	396.374	8.32667e-17	8.32667e-17	8.32667e-17	8.32667e-17	1338.01	6558.17
169474	56.3695	8.32667e-17	5.72753	8.32667e-17	37.5381	1126.01	8.32667e-17	8.32667e-17	2.96278	7.58448	1559.69	6546.48
96186	93.4466	8.32667e-17	8.32667e-17	8.32667e-17	6.97653	837.588	8.32667e-17	1.80339	8.32667e-17	6.07552	1527.82	6545.31
166185	12.1084	8.32667e-17	7.15104	8.32667e-17	5.58742	1219.21	8.32667e-17	8.32667e-17	8.32667e-17	3.05786	1672.24	6530.1
165346	17.1305	1.29127	1.45761	3.30288	58.3755	3376.09	1.33789	1.80339	4.42566	45.31	2196.04	6509.05
162368	79.8351	1.29127	2.88075	3.30288	69.4887	1521.66	1.33789	8.32667e-17	27.8356	42.292	2248.25	6482.15
124966	8.23129	8.32667e-17	1.45761	1.67616	9.75482	1703.87	8.32667e-17	8.32667e-17	8.32667e-17	3.05786	1277.86	6478.64
43084	69.8211	8.32667e-17	8.32667e-17	8.32667e-17	33.3707	1329.82	8.32667e-17	1.80339	17.5937	21.1657	1893.14	6470.45
136604	100.459	1.22207	8.32667e-17	13.0667	68.0996	1558.64	0.0405159	8.32667e-17	13.2042	48.328	2001.86	6451.74
167710	22.1284	8.32667e-17	2.88075	1.67616	26.4248	2120.99	8.32667e-17	8.32667e-17	11.7411	45.31	1809.02	6431.85
52439	54.1007	8.32667e-17	5.72753	11.4393	62.5429	1781.03	8.32667e-17	1.80339	20.5199	96.6158	2283.86	6423.66
110082	189.435	8.32667e-17	1.45761	4.92996	20.8682	2070.59	8.32667e-17	3.54902	8.81486	15.1296	3522.3	6420.16
163457	65.3755	8.32667e-17	1.45761	8.32667e-17	91.7151	2400.78	8.32667e-17	1.80339	2.96278	86.0529	2177.64	6409.63
178329	35.6979	2.49278	8.32667e-17	8.32667e-17	11.144	1289.82	1.40718	8.32667e-17	1.50011	25.6928	1796.93	6404.95
168335	0.99757	2.49278	8.32667e-17	1.67616	16.7007	1915.21	1.40718	1.80339	1.50011	9.09348	2132.38	6403.78
181960	100.481	0.0353364	2.88075	8.32667e-17	41.7056	1679.59	1.25767	8.32667e-17	7.35175	31.7289	1945.18	6395.59
135279	37.348	0.0353364	2.88075	8.32667e-17	44.4839	1756.93	1.25767	8.32667e-17	2.96278	54.364	2128.1	6373.37
164764	15.5254	1.29127	2.88075	1.67616	31.9815	1547.61	1.33789	8.32667e-17	8.32667e-17	19.6567	1678.26	6362.84
117060	109.601	8.32667e-17	2.88075	3.30288	77.8236	2292.22	8.32667e-17	8.32667e-17	11.7411	43.801	2731.45	6349.98
159729	91.4989	1.22207	8.32667e-17	14.6941	68.0996	2026.18	0.0405159	8.32667e-17	17.5937	36.2559	2748.74	6340.62
167521	18.3915	0.0353364	5.72753	1.67616	13.9223	1082.7	1.25767	8.32667e-17	2.96278	4.56662	2056.46	6333.6
35835	1.22668	8.32667e-17	1.45761	8.32667e-17	6.97653	1462.64	8.32667e-17	1.80339	1.50011	1.54936	1781.01	6319.57
169321	46.1486	8.32667e-17	1.45761	14.6941	19.479	1865.01	8.32667e-17	8.32667e-17	14.6674	64.927	2492.54	6306.7
164257	77.6811	8.32667e-17	4.30408	17.9489	118.109	1360.53	8.32667e-17	1.80339	33.6881	101.143	2017.76	6292.67
25125	29.922	8.32667e-17	2.88075	8.18453	62.5429	2615.88	8.32667e-17	3.54902	19.0568	46.819	3205.9	6290.33
165274	176.213	8.32667e-17	2.88075	8.32667e-17	8.36567	935.51	8.32667e-17	8.32667e-17	2.96278	6.07552	1253.38	6276.29
104483	230.107	8.32667e-17	4.30408	9.8119	44.4839	1359.32	8.32667e-17	1.80339	11.7411	28.7108	2132.86	6273.95
91569	0.0114568	8.32667e-17	1.45761	8.32667e-17	1.42063	267.623	8.32667e-17	8.32667e-17	8.32667e-17	8.32667e-17	1507.96	6263.42
40748	112.351	8.32667e-17	4.30408	3.30288	37.5381	1491.98	8.32667e-17	8.78774	4.42566	21.1657	1850.1	6252.9
33331	1578.3	1.22207	21.3867	22.831	127.833	2873.03	0.0405159	8.78774	21.9831	93.5978	3746.69	6235.35
177795	64.7567	0.0353364	8.32667e-17	4.92996	23.6465	1316.58	1.25767	8.32667e-17	4.42566	31.7289	1945.91	6227.17
168867	70.6919	8.32667e-17	8.32667e-17	1.67616	26.4248	1223.25	8.32667e-17	1.80339	2.96278	18.1477	1712.86	6227.17
174015	25.5211	8.32667e-17	8.32667e-17	8.32667e-17	22.2573	1197.04	8.32667e-17	8.32667e-17	1.50011	12.1115	2062.12	6223.66
168167	99.7253	1.22207	8.32667e-17	3.30288	44.4839	1988.82	0.0405159	1.80339	16.1305	39.2739	2611.89	6222.49
167760	187.876	8.32667e-17	1.45761	13.0667	59.7646	2173.45	8.32667e-17	3.54902	7.35175	49.837	2320.94	6211.96
133090	262.14	8.32667e-17	2.88075	8.32667e-17	2.80941	1227.55	8.32667e-17	8.32667e-17	1.50011	7.58448	1989.06	6209.62
166858	91.9343	8.32667e-17	1.45761	1.67616	25.0357	1722.6	8.32667e-17	8.32667e-17	13.2042	43.801	2388.05	6201.43
172060	274.674	1.22207	8.57457	3.30288	33.3707	1458.46	0.0405159	1.80339	14.6674	24.1838	1636.15	6196.76
165292	83.2724	0.0353364	2.88075	6.55721	38.9273	1332.41	1.25767	1.80339	7.35175	39.2739	1838.98	6186.23
177413	828.82	0.0353364	11.4217	1.67616	22.2573	1217.84	1.25767	8.32667e-17	5.88868	45.31	1643.81	6179.21
162655	0.0593439	8.32667e-17	2.88075	4.92996	2.80941	1433.62	8.32667e-17	3.54902	8.32667e-17	3.05786	1975.92	6179.21
102073	59.9902	8.32667e-17	2.88075	9.8119	26.4248	1544.1	8.32667e-17	8.32667e-17	20.5199	25.6928	2084.43	6173.36
88414	65.3984	0.0694155	2.88075	4.92996	36.149	1549.42	2.4828	1.80339	16.1305	34.7469	2079.03	6171.02
102229	0.279302	1.22207	8.32667e-17	1.67616	2.80941	802.193	0.0405159	8.32667e-17	1.50011	4.56662	2038.15	6171.02
22858	87.145	8.32667e-17	8.32667e-17	3.30288	34.7598	1859.02	8.32667e-17	1.80339	5.88868	18.1477	1856.08	6165.17
166386	189.251	1.29127	4.30408	17.9489	76.4345	3282.04	1.33789	8.32667e-17	14.6674	42.292	4661.61	6156.99
116415	154.628	8.32667e-17	4.30408	4.92996	25.0357	1176.68	8.32667e-17	3.54902	14.6674	33.2379	1677.57	6123.07
144808	73.6709	0.0353364	1.45761	1.67616	12.5331	1017.07	1.25767	8.32667e-17	1.50011	10.6025	1589.21	6105.52
162870	17.8183	8.32667e-17	4.30408	4.92996	13.9223	1218.21	8.32667e-17	1.80339	1.50011	10.6025	1959.26	6103.18
163316	106.05	8.32667e-17	5.72753	8.18453	44.4839	2090.13	8.32667e-17	1.80339	4.42566	37.7649	2884.27	6054.06
143213	106.187	8.32667e-17	1.45761	8.18453	25.0357	1562.48	8.32667e-17	8.32667e-17	4.42566	18.1477	1869.18	6051.72
140700	0.49811	8.32667e-17	8.32667e-17	3.30288	2.80941	989.029	8.32667e-17	5.2951	8.32667e-17	1.54936	1493.04	6048.21
162440	107.15	8.32667e-17	1.45761	11.4393	16.7007	1133.13	8.32667e-17	1.80339	5.88868	15.1296	1961.78	5990.9
113560	38.5398	0.0353364	1.45761	6.55721	33.3707	1226.13	1.25767	1.80339	14.6674	34.7469	1905.11	5989.73
172634	50.5028	2.41648	4.30408	8.32667e-17	33.3707	1721.91	0.0795823	1.80339	8.81486	37.7649	1754.35	5980.37
163139	139.528	8.32667e-17	2.88075	3.30288	29.2032	1566.5	8.32667e-17	8.32667e-17	8.81486	19.6567	1896.26	5979.2
168586	131.141	8.32667e-17	2.88075	4.92996	56.9863	1340.71	8.32667e-17	3.54902	11.7411	27.2018	2142.3	5976.86
131092	114.368	8.32667e-17	8.32667e-17	1.67616	38.9273	1340.52	8.32667e-17	3.54902	13.2042	33.2379	1950.02	5948.79
167272	118.607	8.32667e-17	1.45761	8.32667e-17	37.5381	1268.62	8.32667e-17	3.54902	10.278	27.2018	1853.75	5941.77
163278	80.5913	0.0353364	4.30408	6.55721	59.7646	1983.39	1.25767	1.80339	17.5937	54.364	2488.64	5923.06
161026	31.5952	1.29127	1.45761	1.67616	8.36567	1597.01	1.33789	8.32667e-17	8.32667e-17	1.54936	1831.32	5916.04
168308	74.4042	8.32667e-17	2.88075	4.92996	45.8731	1575.95	8.32667e-17	8.32667e-17	10.278	28.7108	2024.91	5913.7
167424	49.7465	8.32667e-17	4.30408	4.92996	26.4248	1276.41	8.32667e-17	8.32667e-17	2.96278	16.6386	1704.85	5885.63
172585	3.63934	0.0353364	1.45761	8.32667e-17	1.42063	861.358	1.25767	8.32667e-17	8.32667e-17	8.32667e-17	1415.55	5852.88
106304	0.520493	1.22207	8.32667e-17	3.30288	68.0996	2379.36	0.0405159	8.32667e-17	1.50011	25.6928	2057.09	5806.1
184621	65.2838	8.32667e-17	4.30408	4.92996	13.9223	1565.36	8.32667e-17	8.32667e-17	4.42566	30.2199	2062.8	5803.76
41555	109.258	8.32667e-17	1.45761	1.67616	36.149	1249.7	8.32667e-17	1.80339	10.278	24.1838	1605.98	5800.25
162786	38.196	8.32667e-17	8.32667e-17	1.67616	23.6465	1615.67	8.32667e-17	8.32667e-17	8.32667e-17	1.54936	1873.32	5799.08
163930	102.635	8.32667e-17	4.30408	1.67616	27.814	1235.1	8.32667e-17	3.54902	21.9831	45.31	1627.6	5789.72
157257	88.7491	0.0353364	1.45761	6.55721	37.5381	1950.34	1.25767	3.54902	7.35175	42.292	2733.75	5785.04
158631	4.39745	8.32667e-17	8.32667e-17	8.32667e-17	1.42063	1124.69	8.32667e-17	1.80339	8.32667e-17	8.32667e-17	1566.45	5779.19
167821	75.55	8.32667e-17	1.45761	9.8119	30.5923	2003.39	8.32667e-17	1.80339	10.278	43.801	2537.42	5766.33
166954	155.361	2.49278	4.30408	8.32667e-17	9.75482	1196.88	1.40718	1.80339	4.42566	12.1115	1905.05	5753.46
141780	0.974694	1.29127	8.32667e-17	1.67616	1.42063	1691.37	1.33789	8.32667e-17	8.32667e-17	4.56662	1793.56	5726.56
166579	84.2348	1.22207	8.32667e-17	6.55721	48.6514	1479.93	0.0405159	8.32667e-17	2.96278	19.6567	1783.74	5723.05
108526	53.6195	1.22207	4.30408	3.30288	8.36567	1480.28	0.0405159	3.54902	8.81486	28.7108	2089.74	5717.2
164559	246.88	1.29127	8.57457	6.55721	34.7598	1050.44	1.33789	1.80339	23.4462	60.4	1713.83	5711.36
42400	47.2027	0.0694155	2.88075	1.67616	68.0996	1848.27	2.4828	1.80339	8.81486	63.418	1766.71	5704.34
160827	84.3952	1.22207	1.45761	8.32667e-17	26.4248	1146.16	0.0405159	1.80339	11.7411	21.1657	1726.23	5693.81
165019	92.4155	8.32667e-17	7.15104	4.92996	12.5331	1229.99	8.32667e-17	8.32667e-17	2.96278	19.6567	1791.4	5690.3
97247	3.70827	0.0353364	1.45761	3.30288	6.97653	1063.87	1.25767	8.32667e-17	1.50011	7.58448	1838.42	5679.78
182755	277.309	0.0353364	1.45761	1.67616	25.0357	1231.2	1.25767	3.54902	13.2042	15.1296	1691.22	5665.74
135087	143.95	0.0353364	2.88075	8.32667e-17	20.8682	1320.25	1.25767	1.80339	8.81486	19.6567	1676.51	5661.06
102821	60.7235	0.0353364	4.30408	3.30288	22.2573	1587.63	1.25767	8.32667e-17	2.96278	18.1477	1781.22	5659.89
129120	110.403	8.32667e-17	4.30408	8.32667e-17	19.479	1196.75	8.32667e-17	1.80339	8.32667e-17	16.6386	1783.2	5652.87
93771	63.4964	0.0353364	1.45761	1.67616	47.2623	1734.35	1.25767	1.80339	21.9831	21.1657	2155.14	5643.52
165293	85.9535	0.0353364	2.88075	3.30288	33.3707	1220.53	1.25767	8.32667e-17	20.5199	37.7649	1664.12	5632.99
162779	102.544	1.22207	8.32667e-17	6.55721	44.4839	1979.33	0.0405159	8.32667e-17	14.6674	31.7289	2407.37	5631.82
166254	88.3366	2.41648	8.32667e-17	4.92996	27.814	1557.28	0.0795823	1.80339	10.278	27.2018	1973.42	5629.48
162804	1.36435	8.32667e-17	8.32667e-17	8.32667e-17	8.32667e-17	1120.77	8.32667e-17	8.32667e-17	1.50011	1.54936	1613.82	5625.97
169595	71.9752	8.32667e-17	8.32667e-17	1.67616	22.2573	1552.07	8.32667e-17	1.80339	8.81486	10.6025	2076.32	5600.24
167882	93.9049	1.22207	1.45761	1.67616	16.7007	965.426	0.0405159	1.80339	7.35175	12.1115	1755.59	5596.73
102904	159.669	0.0353364	2.88075	3.30288	18.0898	1096.86	1.25767	1.80339	10.278	13.6206	1625.95	5594.39
163110	3.86909	0.0353364	1.45761	1.67616	16.7007	1047.6	1.25767	8.32667e-17	8.32667e-17	22.6747	1560.86	5589.71
45052	5.17832	0.0694155	2.88075	4.92996	22.2573	2419.26	2.4828	1.80339	2.96278	33.2379	2046.3	5586.2
167448	5.01757	1.22207	1.45761	8.32667e-17	8.36567	995.674	0.0405159	1.80339	8.81486	12.1115	1493.06	5578.02
169187	20.7988	8.32667e-17	5.72753	8.32667e-17	11.144	1309.82	8.32667e-17	8.32667e-17	1.50011	3.05786	1848.42	5559.3
165273	81.3017	8.32667e-17	1.45761	8.32667e-17	9.75482	709.609	8.32667e-17	1.80339	2.96278	7.58448	1206.68	5545.27
161117	29.2573	8.32667e-17	4.30408	1.67616	4.19837	635.155	8.32667e-17	8.32667e-17	8.32667e-17	8.32667e-17	1152.3	5541.76
31440	181.163	0.0353364	1.45761	4.92996	19.479	1449.24	1.25767	1.80339	2.96278	7.58448	1695.7	5512.52
24427	85.2889	8.32667e-17	7.15104	3.30288	13.9223	1243.07	8.32667e-17	8.32667e-17	8.32667e-17	15.1296	1624.91	5501.99
163522	93.0571	1.22207	4.30408	4.92996	26.4248	1369.45	0.0405159	1.80339	5.88868	19.6567	1684.72	5491.46
168140	42.4359	8.32667e-17	1.45761	1.67616	11.144	1183.24	8.32667e-17	1.80339	8.32667e-17	8.32667e-17	1615.31	5486.79
168404	93.0571	2.41648	1.45761	6.55721	90.3259	2305.29	0.0795823	5.2951	19.0568	98.1248	2463.29	5484.45
168910	109.097	8.32667e-17	8.32667e-17	8.32667e-17	34.7598	1189.95	8.32667e-17	1.80339	5.88868	24.1838	1662.7	5484.45
167509	24.0311	8.32667e-17	8.32667e-17	8.32667e-17	9.75482	647.626	8.32667e-17	8.32667e-17	2.96278	7.58448	1556.99	5462.22
166795	21.9221	0.0353364	2.88075	1.67616	13.9223	1287.03	1.25767	8.32667e-17	1.50011	19.6567	1688.62	5459.88
162196	66.5213	8.32667e-17	4.30408	1.67616	41.7056	1957.26	8.32667e-17	8.32667e-17	8.32667e-17	51.346	1716.76	5452.87
107930	0.475788	0.0353364	8.32667e-17	8.32667e-17	2.80941	624.719	1.25767	8.32667e-17	8.32667e-17	8.32667e-17	1278.09	5451.7
162785	0.49811	1.29127	1.45761	8.32667e-17	8.36567	1096.54	1.33789	5.2951	2.96278	33.2379	1398.57	5447.02
156522	1.02045	0.0353364	8.32667e-17	8.32667e-17	6.97653	1710.85	1.25767	8.32667e-17	1.50011	3.05786	2646.72	5443.51
168030	7.79528	8.32667e-17	2.88075	1.67616	13.9223	1423.88	8.32667e-17	1.80339	1.50011	3.05786	1623.91	5442.34
165565	80.4309	8.32667e-17	4.30408	4.92996	31.9815	1316.21	8.32667e-17	8.32667e-17	14.6674	42.292	1635.89	5430.64
34912	80.8892	8.32667e-17	8.32667e-17	3.30288	59.7646	1561.16	8.32667e-17	8.32667e-17	14.6674	45.31	1875.94	5430.64
30925	3.84612	8.32667e-17	1.45761	8.32667e-17	4.19837	742.035	8.32667e-17	1.80339	4.42566	8.32667e-17	1630.41	5414.27
168146	230.382	8.32667e-17	2.88075	4.92996	31.9815	1515.71	8.32667e-17	5.2951	7.35175	24.1838	1693.1	5411.93
166927	4.07585	8.32667e-17	2.88075	8.32667e-17	15.3115	1728.68	8.32667e-17	3.54902	8.32667e-17	1.54936	1846.42	5410.76
163337	130.797	8.32667e-17	4.30408	3.30288	27.814	1249.83	8.32667e-17	8.32667e-17	5.88868	22.6747	1711.56	5401.4
163207	95.6694	8.32667e-17	1.45761	4.92996	36.149	1393.26	8.32667e-17	1.80339	16.1305	36.2559	1594.07	5372.16
164959	62.3506	1.29127	8.32667e-17	8.18453	30.5923	1308.26	1.33789	1.80339	14.6674	39.2739	1658.89	5369.82
167089	99.267	0.0353364	8.32667e-17	8.32667e-17	9.75482	888.045	1.25767	1.80339	1.50011	9.09348	1499.54	5363.97
164370	8.66728	8.32667e-17	8.32667e-17	3.30288	18.0898	1001.42	8.32667e-17	8.32667e-17	1.50011	3.05786	1854.51	5356.96
105020	81.7371	8.32667e-17	8.32667e-17	8.18453	31.9815	1377.39	8.32667e-17	3.54902	20.5199	39.2739	1659.02	5355.79
164436	111.458	0.0353364	2.88075	1.67616	16.7007	1153.94	1.25767	1.80339	7.35175	16.6386	1573.29	5335.9
39843	176.878	8.32667e-17	8.32667e-17	4.92996	15.3115	999.813	8.32667e-17	8.32667e-17	7.35175	27.2018	1609.47	5331.22
144223	4.16774	8.32667e-17	8.32667e-17	8.32667e-17	11.144	977.982	8.32667e-17	3.54902	8.32667e-17	7.58448	1227.78	5300.81
94318	99.3816	8.32667e-17	4.30408	8.18453	16.7007	1058.26	8.32667e-17	8.32667e-17	10.278	27.2018	1581.19	5287.95
136419	4.14477	0.0353364	2.88075	8.32667e-17	2.80941	467.086	1.25767	8.32667e-17	8.32667e-17	1.54936	1762.13	5284.44
128655	64.7797	1.22207	2.88075	4.92996	25.0357	1353.68	0.0405159	7.04137	11.7411	13.6206	1834.96	5278.59
163835	16.4426	8.32667e-17	8.32667e-17	8.32667e-17	33.3707	1574.06	8.32667e-17	1.80339	4.42566	9.09348	1582.2	5278.59
147322	31.091	8.32667e-17	2.88075	8.32667e-17	18.0898	955.326	8.32667e-17	8.32667e-17	4.42566	6.07552	1189.84	5250.52
146781	0.258272	8.32667e-17	2.88075	1.67616	8.32667e-17	387.5	8.32667e-17	8.32667e-17	1.50011	8.32667e-17	726.537	5250.52
162090	44.6818	8.32667e-17	8.32667e-17	8.32667e-17	6.97653	588.683	8.32667e-17	8.32667e-17	8.32667e-17	8.32667e-17	1152.11	5248.18
168813	619.985	8.32667e-17	14.2688	3.30288	16.7007	907.904	8.32667e-17	3.54902	1.50011	13.6206	1445.46	5232.97
166441	105.431	8.32667e-17	8.32667e-17	3.30288	29.2032	1325.52	8.32667e-17	8.32667e-17	21.9831	36.2559	1639.97	5229.46
167135	0.237502	8.32667e-17	2.88075	8.32667e-17	1.42063	820.358	8.32667e-17	8.32667e-17	8.32667e-17	1.54936	1564.31	5228.3
28157	34.4373	1.22207	2.88075	3.30288	47.2623	1707.13	0.0405159	3.54902	2.96278	13.6206	1643.31	5201.39
172904	19.4232	8.32667e-17	1.45761	1.67616	8.36567	1103.05	8.32667e-17	8.32667e-17	4.42566	8.32667e-17	1316.03	5194.38
164414	46.4236	8.32667e-17	8.32667e-17	4.92996	15.3115	777.761	8.32667e-17	8.32667e-17	7.35175	4.56662	1497.86	5187.36
168546	63.5193	8.32667e-17	2.88075	8.18453	36.149	1324.18	8.32667e-17	8.32667e-17	16.1305	36.2559	1634.55	5178
162715	115.949	8.32667e-17	1.45761	8.18453	38.9273	2067.29	8.32667e-17	3.54902	16.1305	36.2559	2601.16	5178
37828	117.461	1.22207	5.72753	8.32667e-17	22.2573	1435.94	0.0405159	1.80339	8.81486	19.6567	1695.67	5175.66
166342	58.1569	8.32667e-17	1.45761	8.32667e-17	20.8682	1063.37	8.32667e-17	8.32667e-17	8.32667e-17	4.56662	1436.38	5165.13
24332	143.24	8.32667e-17	7.15104	1.67616	44.4839	1411.19	8.32667e-17	8.32667e-17	7.35175	21.1657	2146.49	5162.8
166304	49.4715	8.32667e-17	1.45761	9.8119	13.9223	983.872	8.32667e-17	3.54902	5.88868	10.6025	1614.85	5151.1
33813	74.2896	8.32667e-17	1.45761	6.55721	43.0948	1519.91	8.32667e-17	8.32667e-17	21.9831	43.801	1852.86	5147.59
42120	57.6986	0.0353364	2.88075	1.67616	69.4887	2069.29	1.25767	1.80339	8.81486	63.418	1951.13	5135.89
167932	86.2284	8.32667e-17	4.30408	1.67616	20.8682	1490.25	8.32667e-17	7.04137	1.50011	13.6206	1549.57	5133.55
46444	26.3921	8.32667e-17	1.45761	3.30288	27.814	1092.91	8.32667e-17	8.32667e-17	11.7411	22.6747	1657.07	5111.33
108583	17.7725	8.32667e-17	2.88075	1.67616	6.97653	781.384	8.32667e-17	1.80339	8.32667e-17	8.32667e-17	1239.39	5106.65
163956	24.8563	2.41648	1.45761	3.30288	56.9863	1716.41	0.0795823	1.80339	1.50011	49.837	1623.02	5097.3
168394	262.438	0.0353364	5.72753	9.8119	50.0406	1360.23	1.25767	1.80339	16.1305	31.7289	1756.45	5091.45
163653	7.97887	8.32667e-17	8.32667e-17	1.67616	11.144	1294.79	8.32667e-17	1.80339	1.50011	3.05786	1531.62	5086.77
168974	7.17561	8.32667e-17	8.32667e-17	8.32667e-17	23.6465	1027.17	8.32667e-17	8.32667e-17	5.88868	12.1115	1241.43	5084.43
152936	69.7753	8.32667e-17	4.30408	3.30288	30.5923	997.047	8.32667e-17	8.32667e-17	11.7411	15.1296	1525.54	5083.26
133608	123.533	8.32667e-17	2.88075	9.8119	50.0406	1212.45	8.32667e-17	8.32667e-17	11.7411	33.2379	1585.6	5065.72
91821	85.7472	1.22207	2.88075	9.8119	45.8731	1939.39	0.0405159	8.32667e-17	13.2042	25.6928	2376.17	5059.87
168387	70.944	8.32667e-17	8.32667e-17	6.55721	33.3707	1167.29	8.32667e-17	8.32667e-17	16.1305	22.6747	1615.28	5054.02
98150	37.2334	1.29127	4.30408	6.55721	12.5331	1488.64	1.33789	1.80339	2.96278	12.1115	1376.33	5039.98
159561	67.8275	8.32667e-17	8.32667e-17	1.67616	15.3115	1192.08	8.32667e-17	8.32667e-17	1.50011	9.09348	1308.11	5016.59
163978	1.18082	8.32667e-17	1.45761	1.67616	12.5331	1358.93	8.32667e-17	3.54902	8.32667e-17	10.6025	1775.4	5011.91
97500	41.4046	8.32667e-17	1.45761	4.92996	40.3165	1924.21	8.32667e-17	3.54902	1.50011	25.6928	1865.64	5007.23
109183	61.5256	8.32667e-17	8.32667e-17	6.55721	31.9815	1265.71	8.32667e-17	8.32667e-17	14.6674	34.7469	1652.03	4985.01
165582	26.14	8.32667e-17	8.32667e-17	8.18453	26.4248	1144.42	8.32667e-17	3.54902	1.50011	3.05786	1423.03	4969.81
166917	133.799	8.32667e-17	1.45761	1.67616	55.5972	1151.8	8.32667e-17	1.80339	1.50011	70.963	1096.97	4967.47
175928	34.5519	0.0353364	4.30408	3.30288	19.479	817.116	1.25767	3.54902	5.88868	25.6928	1162.39	4941.73
167302	52.6799	8.32667e-17	2.88075	9.8119	36.149	1342.96	8.32667e-17	3.54902	13.2042	48.328	1761.84	4937.06
93668	28.4322	8.32667e-17	8.32667e-17	8.32667e-17	9.75482	1121.65	8.32667e-17	1.80339	10.278	4.56662	1313.37	4931.21
102661	1.1579	0.0353364	2.88075	8.32667e-17	5.58742	632.402	1.25767	8.32667e-17	2.96278	4.56662	1094.12	4928.87
167151	71.9293	8.32667e-17	1.45761	6.55721	25.0357	1165.58	8.32667e-17	8.32667e-17	8.81486	25.6928	1358.12	4926.53
168658	923.775	8.32667e-17	2.88075	8.32667e-17	8.36567	622.339	8.32667e-17	8.32667e-17	2.96278	13.6206	1512.23	4924.19
167660	66.6358	8.32667e-17	7.15104	3.30288	40.3165	1540.35	8.32667e-17	1.80339	5.88868	27.2018	1296.57	4920.68
96644	126.833	8.32667e-17	4.30408	11.4393	20.8682	1148.71	8.32667e-17	8.32667e-17	21.9831	30.2199	1632.83	4919.51
164048	319.196	8.32667e-17	2.88075	8.18453	48.6514	1480.95	8.32667e-17	1.80339	20.5199	67.945	1553.62	4903.14
156230	5.56868	8.32667e-17	1.45761	3.30288	18.0898	1184.51	8.32667e-17	8.32667e-17	1.50011	1.54936	1566.59	4900.8
43984	10.0209	1.22207	1.45761	3.30288	33.3707	1491.31	0.0405159	7.04137	8.32667e-17	27.2018	1381.75	4897.29
152841	66.0859	8.32667e-17	1.45761	3.30288	31.9815	1298.93	8.32667e-17	8.32667e-17	11.7411	33.2379	1643.98	4890.27
145456	51.3507	8.32667e-17	1.45761	6.55721	44.4839	1172.42	8.32667e-17	1.80339	8.81486	27.2018	1484	4886.76
93548	113.222	8.32667e-17	4.30408	1.67616	23.6465	1116.62	8.32667e-17	8.32667e-17	5.88868	28.7108	1500.11	4885.59
165000	26.3005	8.32667e-17	8.32667e-17	1.67616	5.58742	669.657	8.32667e-17	8.32667e-17	8.32667e-17	6.07552	1138.9	4879.74
178028	30.3575	0.0694155	8.32667e-17	8.32667e-17	44.4839	1128.83	2.4828	8.32667e-17	1.50011	12.1115	1681.52	4870.39
27223	0.104495	8.32667e-17	8.32667e-17	4.92996	12.5331	1025.27	8.32667e-17	8.32667e-17	8.32667e-17	8.32667e-17	1784.17	4859.86
168583	109.624	8.32667e-17	1.45761	4.92996	20.8682	1189.87	8.32667e-17	8.32667e-17	5.88868	12.1115	1600.44	4857.52
165122	53.4591	8.32667e-17	1.45761	1.67616	18.0898	800.13	8.32667e-17	8.32667e-17	5.88868	30.2199	1335.52	4846.99
168537	2.74311	8.32667e-17	8.32667e-17	4.92996	6.97653	1102.85	8.32667e-17	1.80339	2.96278	15.1296	1206.44	4846.99
34911	108.456	8.32667e-17	7.15104	6.55721	80.6019	1544.95	8.32667e-17	1.80339	13.2042	72.472	1682.32	4844.65
24117	179.627	8.32667e-17	2.88075	6.55721	40.3165	1370.97	8.32667e-17	8.32667e-17	13.2042	43.801	1839.06	4844.65
101210	0.542929	8.32667e-17	5.72753	1.67616	2.80941	777.63	8.32667e-17	1.80339	4.42566	8.32667e-17	1395	4842.31
103681	70.3482	8.32667e-17	7.15104	3.30288	36.149	1356.31	8.32667e-17	8.32667e-17	1.50011	15.1296	1809.24	4837.64
163918	0.0114568	0.0353364	8.32667e-17	1.67616	8.32667e-17	677.283	1.25767	1.80339	8.32667e-17	8.32667e-17	961.746	4837.64
156066	104.973	0.0353364	5.72753	22.831	73.6562	1120.58	1.25767	1.80339	10.278	16.6386	1478.47	4832.96
105658	100.023	8.32667e-17	1.45761	8.32667e-17	23.6465	1210.95	8.32667e-17	1.80339	5.88868	15.1296	1466.48	4832.96
45855	26.3463	8.32667e-17	8.32667e-17	3.30288	25.0357	854.772	8.32667e-17	8.32667e-17	5.88868	15.1296	1457.49	4810.73
89679	86.5263	1.22207	2.88075	6.55721	48.6514	1494.55	0.0405159	1.80339	5.88868	48.328	1774.29	4799.04
158903	219.704	0.0353364	4.30408	1.67616	18.0898	1366.72	1.25767	8.32667e-17	8.32667e-17	27.2018	1635.98	4795.53
116976	67.2546	8.32667e-17	1.45761	8.32667e-17	18.0898	991.227	8.32667e-17	8.32667e-17	2.96278	6.07552	1204.82	4790.85
168686	90.1011	1.29127	2.88075	8.32667e-17	25.0357	1152.44	1.33789	1.80339	4.42566	27.2018	1455.53	4788.51
145862	172.318	8.32667e-17	7.15104	1.67616	20.8682	769.882	8.32667e-17	5.2951	10.278	18.1477	1577.7	4785
163086	36.9584	8.32667e-17	1.45761	4.92996	15.3115	1051.45	8.32667e-17	8.32667e-17	5.88868	10.6025	1466.13	4776.81
167235	129.995	8.32667e-17	1.45761	1.67616	40.3165	1541.38	8.32667e-17	1.80339	7.35175	21.1657	2026.2	4774.48
119307	108.318	8.32667e-17	1.45761	8.32667e-17	16.7007	842.613	8.32667e-17	8.32667e-17	1.50011	13.6206	1316.71	4767.46
166573	73.098	0.0353364	2.88075	1.67616	23.6465	1217.75	1.25767	1.80339	11.7411	28.7108	1578.84	4761.61
182186	74.9083	8.32667e-17	1.45761	1.67616	12.5331	1343.34	8.32667e-17	3.54902	5.88868	9.09348	2116.58	4755.76
163071	90.2156	1.29127	4.30408	8.18453	44.4839	1226.9	1.33789	1.80339	11.7411	66.436	1470.58	4754.59
130651	141.017	8.32667e-17	1.45761	9.8119	66.7104	1342.65	8.32667e-17	8.32667e-17	20.5199	58.891	1535.77	4745.23
140786	58.5236	1.22207	8.32667e-17	4.92996	23.6465	841.488	0.0405159	8.32667e-17	4.42566	18.1477	1460.15	4739.39
168909	143.904	1.22207	7.15104	8.18453	70.8779	1370.61	0.0405159	5.2951	7.35175	27.2018	1561.54	4735.88
136441	48.0965	8.32667e-17	8.32667e-17	1.67616	18.0898	1151.24	8.32667e-17	8.32667e-17	8.81486	31.7289	1542.15	4726.52
163542	34.7811	0.0353364	8.32667e-17	8.32667e-17	1.42063	1229.39	1.25767	8.32667e-17	8.32667e-17	6.07552	1365.02	4723.01
100776	115.376	8.32667e-17	1.45761	3.30288	41.7056	1510.45	8.32667e-17	8.32667e-17	24.9094	36.2559	1735.06	4708.98
164637	93.5154	8.32667e-17	2.88075	3.30288	25.0357	1216.42	8.32667e-17	1.80339	16.1305	25.6928	1576.13	4706.64
166678	103.14	8.32667e-17	8.32667e-17	3.30288	31.9815	1203.12	8.32667e-17	1.80339	5.88868	19.6567	1570.69	4703.13
162882	23.5726	8.32667e-17	1.45761	3.30288	9.75482	871.584	8.32667e-17	8.32667e-17	1.50011	13.6206	1165.26	4700.79
162334	46.2861	8.32667e-17	1.45761	1.67616	12.5331	958.74	8.32667e-17	1.80339	1.50011	13.6206	1717.67	4699.62
96602	57.2174	8.32667e-17	1.45761	6.55721	45.8731	1387.9	8.32667e-17	1.80339	13.2042	58.891	1565.64	4692.6
158780	26.1629	8.32667e-17	4.30408	8.32667e-17	23.6465	899.746	8.32667e-17	1.80339	4.42566	40.783	1319.58	4679.73
166803	90.926	1.22207	4.30408	3.30288	11.144	1256.22	0.0405159	3.54902	5.88868	13.6206	1522.07	4677.4
166287	58.6611	8.32667e-17	2.88075	8.18453	38.9273	1344	8.32667e-17	1.80339	19.0568	61.909	1545.25	4675.06
32321	0.121574	8.32667e-17	1.45761	1.67616	1.42063	1645.4	8.32667e-17	1.80339	8.32667e-17	8.32667e-17	1299.43	4662.19
162920	53.9174	8.32667e-17	1.45761	1.67616	6.97653	983.605	8.32667e-17	8.32667e-17	1.50011	4.56662	1417.24	4655.17
168025	97.8463	8.32667e-17	1.45761	4.92996	47.2623	1145.87	8.32667e-17	8.32667e-17	8.81486	27.2018	1500.18	4651.66
162758	32.3058	8.32667e-17	5.72753	3.30288	40.3165	1084.61	8.32667e-17	8.32667e-17	5.88868	21.1657	1420.19	4649.32
168749	1.04335	1.22207	8.32667e-17	4.92996	65.3213	2136.59	0.0405159	1.80339	8.32667e-17	19.6567	1554.51	4644.65
31049	89.6428	8.32667e-17	7.15104	1.67616	44.4839	1562.51	8.32667e-17	8.32667e-17	10.278	36.2559	1892.19	4641.14
43128	3.06486	8.32667e-17	1.45761	8.18453	19.479	786.239	8.32667e-17	3.54902	2.96278	9.09348	995.926	4627.1
168374	6.87723	2.41648	1.45761	4.92996	22.2573	1238.91	0.0795823	8.32667e-17	13.2042	36.2559	1500.38	4614.24
169686	9.17206	8.32667e-17	1.45761	8.32667e-17	1.42063	796.441	8.32667e-17	1.80339	2.96278	1.54936	1564.24	4602.54
34648	56.1174	8.32667e-17	1.45761	6.55721	51.4297	1586.74	8.32667e-17	8.32667e-17	8.81486	37.7649	2161.69	4601.37
164455	97.0901	1.22207	1.45761	3.30288	27.814	1137.8	0.0405159	8.32667e-17	5.88868	16.6386	1436.55	4595.52
167916	72.5481	8.32667e-17	1.45761	3.30288	20.8682	1136.43	8.32667e-17	8.32667e-17	2.96278	7.58448	1410.84	4595.52
162283	17.612	1.22207	1.45761	8.32667e-17	54.208	1685.52	0.0405159	8.32667e-17	4.42566	48.328	1429.41	4593.18
165982	2.23744	8.32667e-17	8.32667e-17	8.32667e-17	15.3115	1416.45	8.32667e-17	8.32667e-17	8.32667e-17	8.32667e-17	2085.57	4589.67
145116	20.0422	0.0353364	2.88075	8.32667e-17	12.5331	1100.42	1.25767	8.32667e-17	1.50011	3.05786	1337.68	4574.47
164493	178.825	8.32667e-17	1.45761	8.32667e-17	9.75482	1097.7	8.32667e-17	8.32667e-17	4.42566	9.09348	1301.14	4556.92
96077	91.5447	8.32667e-17	8.32667e-17	1.67616	18.0898	1116.49	8.32667e-17	8.32667e-17	4.42566	16.6386	1413.5	4556.92
165263	82.8828	1.22207	5.72753	3.30288	19.479	913.115	0.0405159	8.32667e-17	8.81486	12.1115	1373.74	4542.89
166088	194.453	0.0353364	5.72753	1.67616	8.36567	932.781	1.25767	5.2951	4.42566	7.58448	1212.78	4532.36
163280	40.8546	2.41648	2.88075	4.92996	18.0898	1236.02	0.0795823	8.32667e-17	11.7411	21.1657	1355.56	4528.85
164545	12.4983	8.32667e-17	8.32667e-17	1.67616	37.5381	1255.19	8.32667e-17	8.32667e-17	2.96278	6.07552	1740	4519.49
180124	119.982	8.32667e-17	2.88075	3.30288	26.4248	1446.7	8.32667e-17	3.54902	5.88868	43.801	1794.52	4513.65
162292	163.083	1.22207	1.45761	8.32667e-17	13.9223	1091.05	0.0405159	3.54902	5.88868	9.09348	1294.36	4505.46
105303	6.23449	8.32667e-17	8.32667e-17	8.32667e-17	1.42063	1122.12	8.32667e-17	5.2951	8.32667e-17	1.54936	1630.07	4499.61
168403	80.5455	8.32667e-17	8.32667e-17	8.32667e-17	18.0898	1381.11	8.32667e-17	8.32667e-17	7.35175	27.2018	1472.23	4485.58
162923	12.3607	1.22207	8.32667e-17	8.32667e-17	5.58742	1081.26	0.0405159	8.32667e-17	8.32667e-17	8.32667e-17	1048.11	4483.24
166083	93.6529	1.22207	2.88075	8.18453	20.8682	1069.79	0.0405159	8.32667e-17	11.7411	21.1657	1299.72	4464.52
167169	96.563	8.32667e-17	1.45761	3.30288	25.0357	1216.24	8.32667e-17	8.32667e-17	11.7411	28.7108	1452.96	4461.01
168875	114.78	8.32667e-17	1.45761	1.67616	16.7007	1043.63	8.32667e-17	1.80339	5.88868	16.6386	1579.8	4459.84
36928	90.4906	0.0353364	1.45761	8.32667e-17	16.7007	835.883	1.25767	8.32667e-17	4.42566	7.58448	1261.21	4458.67
176330	10.1127	0.102302	8.32667e-17	8.32667e-17	36.149	1512.09	3.71097	8.32667e-17	2.96278	8.32667e-17	1988.24	4455.16
166518	24.6042	8.32667e-17	8.32667e-17	1.67616	11.144	1253.49	8.32667e-17	8.32667e-17	4.42566	15.1296	1473.34	4455.16
158306	1.36435	8.32667e-17	8.32667e-17	1.67616	16.7007	901.535	8.32667e-17	8.32667e-17	8.32667e-17	1.54936	1666.07	4442.3
136464	24.077	8.32667e-17	2.88075	1.67616	26.4248	1216.23	8.32667e-17	1.80339	5.88868	18.1477	1443.49	4441.13
162344	175.022	8.32667e-17	4.30408	3.30288	30.5923	1022.46	8.32667e-17	1.80339	13.2042	16.6386	1651.49	4439.96
122795	37.8522	8.32667e-17	1.45761	1.67616	33.3707	1076.5	8.32667e-17	3.54902	7.35175	30.2199	1337.62	4439.96
169254	80.7976	0.0353364	8.32667e-17	1.67616	19.479	882.413	1.25767	8.32667e-17	7.35175	22.6747	1281.64	4435.28
150412	1.84673	8.32667e-17	8.32667e-17	8.32667e-17	1.42063	981.74	8.32667e-17	8.32667e-17	8.32667e-17	8.32667e-17	1108.74	4435.28
164902	105.225	8.32667e-17	1.45761	4.92996	26.4248	1421.01	8.32667e-17	8.32667e-17	8.81486	18.1477	1480.42	4420.08
102598	7.33627	8.32667e-17	2.88075	1.67616	20.8682	1167.85	8.32667e-17	3.54902	1.50011	8.32667e-17	1144.35	4418.91
23826	241.449	8.32667e-17	7.15104	16.3215	126.444	2462.14	8.32667e-17	5.2951	39.5406	89.0708	2326.67	4415.4
39164	0.0464846	8.32667e-17	2.88075	1.67616	8.32667e-17	747.224	8.32667e-17	8.32667e-17	1.50011	8.32667e-17	1515.36	4394.34
165009	74.8167	8.32667e-17	5.72753	6.55721	19.479	1201.55	8.32667e-17	8.32667e-17	8.81486	22.6747	1408.27	4390.83
168450	6.05083	1.29127	1.45761	8.32667e-17	20.8682	1397.04	1.33789	3.54902	8.32667e-17	12.1115	1460.08	4375.63
167812	12.246	8.32667e-17	8.32667e-17	8.32667e-17	2.80941	576.708	8.32667e-17	1.80339	1.50011	4.56662	1135.83	4366.27
152980	65.1234	0.0353364	4.30408	8.32667e-17	12.5331	1200.16	1.25767	5.2951	16.1305	12.1115	1371.73	4365.1
20098	18.1393	1.22207	8.32667e-17	8.32667e-17	2.80941	647.467	0.0405159	8.32667e-17	8.32667e-17	3.05786	1410.8	4363.93
164656	2.53625	8.32667e-17	8.32667e-17	3.30288	12.5331	1604.67	8.32667e-17	8.32667e-17	1.50011	13.6206	1598.49	4356.91
43347	3.80017	8.32667e-17	8.32667e-17	3.30288	9.75482	1211.18	8.32667e-17	8.32667e-17	8.32667e-17	1.54936	1630.26	4341.71
167811	55.2924	1.22207	2.88075	1.67616	30.5923	1188.28	0.0405159	8.32667e-17	14.6674	37.7649	1420.42	4338.2
156037	59.0277	8.32667e-17	1.45761	11.4393	20.8682	1032.72	8.32667e-17	7.04137	7.35175	7.58448	1384.88	4325.33
169647	13.8972	8.32667e-17	8.32667e-17	1.67616	22.2573	1061.18	8.32667e-17	8.32667e-17	16.1305	34.7469	1808.62	4321.83
166913	91.1093	1.22207	1.45761	8.32667e-17	22.2573	951.677	0.0405159	8.32667e-17	1.50011	16.6386	1392.79	4315.98
164139	14.4935	8.32667e-17	2.88075	14.6941	159.783	1497.07	8.32667e-17	1.80339	16.1305	73.9809	1672.77	4312.47
26256	74.5646	1.29127	8.32667e-17	3.30288	54.208	1698.52	1.33789	1.80339	16.1305	36.2559	2233.63	4312.47
166865	56.759	8.32667e-17	5.72753	3.30288	44.4839	1027.35	8.32667e-17	1.80339	20.5199	54.364	1345.62	4311.3
91696	49.3111	0.102302	1.45761	8.32667e-17	15.3115	948.84	3.71097	8.32667e-17	2.96278	13.6206	1279.12	4308.96
116501	6.34927	8.32667e-17	2.88075	3.30288	12.5331	1418.43	8.32667e-17	8.32667e-17	2.96278	3.05786	1535.91	4299.6
165877	96.9068	8.32667e-17	8.57457	6.55721	31.9815	1002.29	8.32667e-17	8.32667e-17	10.278	34.7469	1474.13	4294.92
40161	156.942	8.32667e-17	2.88075	6.55721	30.5923	1344.28	8.32667e-17	3.54902	17.5937	22.6747	1759.13	4286.74
30024	131.874	8.32667e-17	4.30408	8.32667e-17	45.8731	1452.17	8.32667e-17	1.80339	19.0568	43.801	1916.38	4278.55
23174	134.739	8.32667e-17	1.45761	3.30288	45.8731	1410.64	8.32667e-17	5.2951	7.35175	34.7469	1663.14	4245.8
175557	29.8762	1.22207	2.88075	4.92996	44.4839	857.905	0.0405159	8.32667e-17	35.1513	57.382	973.156	4243.46
27861	44.9798	8.32667e-17	4.30408	8.32667e-17	20.8682	1264.64	8.32667e-17	8.32667e-17	1.50011	8.32667e-17	1864.57	4239.95
167663	195.553	8.32667e-17	1.45761	14.6941	40.3165	1040.8	8.32667e-17	3.54902	24.9094	46.819	1455.27	4232.93
113869	50.1361	8.32667e-17	1.45761	4.92996	34.7598	1027.68	8.32667e-17	8.32667e-17	1.50011	27.2018	1578.41	4230.59
96226	20.3173	8.32667e-17	7.15104	4.92996	13.9223	1077.84	8.32667e-17	8.32667e-17	2.96278	19.6567	1344.39	4229.42
168223	157.08	1.22207	8.32667e-17	3.30288	31.9815	1231.79	0.0405159	8.32667e-17	7.35175	10.6025	1218.89	4227.09
44788	61.0673	8.32667e-17	7.15104	9.8119	34.7598	1342.45	8.32667e-17	8.32667e-17	14.6674	51.346	1405.84	4225.92
154432	5.24721	8.32667e-17	4.30408	4.92996	6.97653	1147.96	8.32667e-17	1.80339	8.32667e-17	15.1296	1167.3	4221.24
167470	114.299	1.29127	4.30408	8.18453	45.8731	2053.91	1.33789	8.32667e-17	13.2042	40.783	2507.69	4216.56
148942	154.972	8.32667e-17	5.72753	3.30288	47.2623	1313.1	8.32667e-17	5.2951	7.35175	33.2379	1346.24	4211.88
172258	40.2358	8.32667e-17	4.30408	4.92996	27.814	1311.66	8.32667e-17	1.80339	1.50011	16.6386	1279.93	4203.69
143748	29.8991	8.32667e-17	2.88075	8.32667e-17	13.9223	849.129	8.32667e-17	3.54902	8.32667e-17	6.07552	1238.25	4201.35
40540	43.9714	8.32667e-17	5.72753	8.32667e-17	18.0898	940.879	8.32667e-17	8.32667e-17	1.50011	10.6025	1285.86	4200.18
168684	23.8019	8.32667e-17	1.45761	1.67616	2.80941	1141.19	8.32667e-17	3.54902	8.81486	6.07552	1105.06	4165.09
175299	67.0025	8.32667e-17	8.32667e-17	1.67616	4.19837	758.99	8.32667e-17	8.32667e-17	2.96278	7.58448	1365.16	4160.42
165528	112.535	0.0353364	8.32667e-17	8.32667e-17	11.144	1273.41	1.25767	8.32667e-17	2.96278	8.32667e-17	1459.85	4158.08
168538	0.633108	1.22207	1.45761	3.30288	6.97653	979.086	0.0405159	8.32667e-17	8.32667e-17	12.1115	1110.09	4154.57
98345	69.9815	0.0353364	8.32667e-17	8.32667e-17	9.75482	948.7	1.25767	3.54902	2.96278	12.1115	1199.29	4144.04
103167	39.2961	8.32667e-17	8.32667e-17	8.32667e-17	6.97653	760.358	8.32667e-17	8.32667e-17	2.96278	13.6206	1393.59	4101.93
152766	88.1533	0.0694155	5.72753	4.92996	31.9815	1760.57	2.4828	8.32667e-17	8.81486	13.6206	1823.45	4090.24
166886	61.5943	8.32667e-17	5.72753	3.30288	26.4248	1123.41	8.32667e-17	8.32667e-17	10.278	36.2559	1600.29	4090.24
168383	54.0778	8.32667e-17	4.30408	1.67616	22.2573	1163.1	8.32667e-17	8.32667e-17	8.81486	24.1838	1469.09	4090.24
176212	203.962	8.32667e-17	2.88075	6.55721	27.814	1158.84	8.32667e-17	8.32667e-17	2.96278	18.1477	1303.98	4084.39
21540	26.7818	8.32667e-17	4.30408	8.32667e-17	6.97653	541.632	8.32667e-17	8.32667e-17	8.32667e-17	1.54936	842.218	4079.71
184608	72.1356	0.0353364	1.45761	8.18453	68.0996	1154.94	1.25767	5.2951	29.2988	39.2739	1352.69	4065.68
157802	174.036	8.32667e-17	2.88075	4.92996	52.8189	1229.8	8.32667e-17	8.32667e-17	11.7411	24.1838	1635.72	4064.51
129056	4.19071	8.32667e-17	8.32667e-17	8.32667e-17	5.58742	991.262	8.32667e-17	1.80339	1.50011	6.07552	1223.76	4061
97180	49.7465	0.0353364	2.88075	8.18453	37.5381	1499.8	1.25767	8.32667e-17	5.88868	37.7649	1725.57	4056.32
31430	66.4525	0.0353364	2.88075	4.92996	11.144	972.669	1.25767	1.80339	4.42566	4.56662	1229.12	4050.47
113726	77.7269	8.32667e-17	2.88075	8.18453	26.4248	1011.19	8.32667e-17	8.32667e-17	5.88868	25.6928	1219.75	4049.3
96084	52.6341	1.22207	1.45761	1.67616	30.5923	1226.99	0.0405159	1.80339	13.2042	24.1838	1527.42	4043.45
18875	4.60417	8.32667e-17	1.45761	8.32667e-17	8.32667e-17	690.635	8.32667e-17	8.32667e-17	1.50011	3.05786	996.953	4043.45
29015	53.9632	1.29127	2.88075	4.92996	22.2573	1242.93	1.33789	8.32667e-17	8.81486	12.1115	1519.34	4029.42
168692	39.2274	8.32667e-17	8.32667e-17	6.55721	25.0357	1116.38	8.32667e-17	3.54902	8.32667e-17	27.2018	1343.13	4022.4
168371	67.5295	8.32667e-17	2.88075	6.55721	16.7007	962.299	8.32667e-17	1.80339	5.88868	4.56662	1387.41	4021.23
105234	78.8727	8.32667e-17	1.45761	6.55721	31.9815	979.306	8.32667e-17	8.32667e-17	8.81486	22.6747	1225.08	4021.23
151985	9.42444	8.32667e-17	8.32667e-17	8.32667e-17	2.80941	525.585	8.32667e-17	8.32667e-17	1.50011	3.05786	790.783	4020.06
162656	4.90274	8.32667e-17	4.30408	8.32667e-17	6.97653	1330.12	8.32667e-17	8.32667e-17	1.50011	4.56662	1202.84	4017.72
144681	80.5455	1.22207	4.30408	8.32667e-17	33.3707	975.293	0.0405159	8.32667e-17	8.81486	10.6025	1210.19	4014.21
172617	77.8186	8.32667e-17	2.88075	4.92996	34.7598	827.673	8.32667e-17	3.54902	7.35175	34.7469	1124.54	4002.51
19352	8.75906	8.32667e-17	8.32667e-17	8.32667e-17	5.58742	969.871	8.32667e-17	1.80339	8.32667e-17	1.54936	1153.35	4002.51
156478	76.8561	8.32667e-17	5.72753	8.18453	38.9273	1367.82	8.32667e-17	8.32667e-17	24.9094	55.873	1477.62	4001.35
165968	78.4144	8.32667e-17	8.32667e-17	1.67616	13.9223	783.905	8.32667e-17	8.32667e-17	1.50011	24.1838	1159.58	3995.5
164742	56.6903	8.32667e-17	2.88075	1.67616	20.8682	851.663	8.32667e-17	1.80339	7.35175	12.1115	1167.9	3994.33
164243	50.5028	1.22207	2.88075	8.32667e-17	45.8731	1271.77	0.0405159	3.54902	7.35175	18.1477	1275.8	3988.48
177263	25.4753	8.32667e-17	8.32667e-17	6.55721	41.7056	935.705	8.32667e-17	8.32667e-17	8.81486	28.7108	761.113	3987.31
47519	42.6192	8.32667e-17	8.32667e-17	1.67616	34.7598	1753.84	8.32667e-17	1.80339	1.50011	45.31	1767.93	3979.12
167632	61.9381	0.0353364	1.45761	3.30288	22.2573	983.489	1.25767	8.32667e-17	7.35175	18.1477	1341.45	3976.78
164365	60.1048	8.32667e-17	2.88075	1.67616	23.6465	1043.08	8.32667e-17	1.80339	2.96278	25.6928	1221.18	3974.44
168631	56.3236	8.32667e-17	2.88075	4.92996	41.7056	987.604	8.32667e-17	1.80339	20.5199	39.2739	1425.37	3968.6
166155	40.6025	8.32667e-17	4.30408	8.32667e-17	9.75482	677.126	8.32667e-17	8.32667e-17	7.35175	21.1657	892.789	3967.43
172271	61.686	8.32667e-17	2.88075	4.92996	15.3115	996.33	8.32667e-17	3.54902	4.42566	18.1477	1096.61	3966.26
166448	105.133	8.32667e-17	2.88075	3.30288	31.9815	971.365	8.32667e-17	8.32667e-17	4.42566	19.6567	1242.65	3962.75
96057	54.0549	8.32667e-17	8.32667e-17	8.32667e-17	18.0898	1002.22	8.32667e-17	8.32667e-17	8.32667e-17	1.54936	1424.05	3958.07
118022	18.0935	8.32667e-17	8.32667e-17	3.30288	5.58742	637.591	8.32667e-17	8.32667e-17	8.32667e-17	10.6025	1027.86	3955.73
167929	25.9795	8.32667e-17	1.45761	1.67616	23.6465	648.298	8.32667e-17	1.80339	5.88868	27.2018	1073.89	3954.56
166850	66.5671	1.22207	4.30408	8.32667e-17	15.3115	710.87	0.0405159	8.32667e-17	8.81486	12.1115	1166.1	3946.37
158864	47.5236	8.32667e-17	2.88075	3.30288	22.2573	1009.2	8.32667e-17	8.32667e-17	5.88868	13.6206	1674.47	3942.86
169646	108.96	8.32667e-17	1.45761	1.67616	33.3707	999.258	8.32667e-17	1.80339	7.35175	27.2018	1237.31	3942.86
152562	5.49979	8.32667e-17	2.88075	8.32667e-17	6.97653	1090.44	8.32667e-17	8.32667e-17	8.32667e-17	4.56662	992.682	3930
162077	30.4492	8.32667e-17	1.45761	1.67616	9.75482	728.267	8.32667e-17	1.80339	2.96278	12.1115	1247.34	3924.15
162404	43.5589	8.32667e-17	1.45761	8.32667e-17	15.3115	879.542	8.32667e-17	1.80339	5.88868	9.09348	1158.52	3922.98
184924	54.0778	0.0353364	8.32667e-17	3.30288	18.0898	886.287	1.25767	8.32667e-17	2.96278	10.6025	1215.36	3918.3
162732	56.209	0.0353364	1.45761	3.30288	9.75482	1117.44	1.25767	1.80339	2.96278	4.56662	1191.59	3911.28
129226	74.3813	8.32667e-17	2.88075	1.67616	8.36567	910.181	8.32667e-17	1.80339	4.42566	7.58448	1204.6	3897.25
125179	8.00182	2.41648	1.45761	4.92996	40.3165	2087.6	0.0795823	1.80339	7.35175	34.7469	1714.2	3896.08
163859	22.8391	8.32667e-17	8.32667e-17	3.30288	19.479	1226.26	8.32667e-17	1.80339	1.50011	9.09348	1114.71	3884.38
163116	91.5447	8.32667e-17	8.32667e-17	3.30288	36.149	959.219	8.32667e-17	8.32667e-17	8.32667e-17	37.7649	1141.15	3877.36
101740	21.3261	8.32667e-17	8.32667e-17	6.55721	18.0898	891.385	8.32667e-17	1.80339	8.32667e-17	15.1296	1100.38	3876.19
28296	39.2732	1.22207	1.45761	3.30288	26.4248	1314.15	0.0405159	3.54902	1.50011	6.07552	1190.64	3864.5
174190	100.94	0.0353364	1.45761	1.67616	18.0898	1020.48	1.25767	8.32667e-17	7.35175	30.2199	1218.42	3858.65
162056	72.6397	8.32667e-17	4.30408	3.30288	16.7007	988.643	8.32667e-17	1.80339	2.96278	7.58448	1245.4	3845.78
163807	85.2431	8.32667e-17	4.30408	6.55721	23.6465	940.762	8.32667e-17	1.80339	11.7411	16.6386	1218.21	3837.6
137312	0.587941	8.32667e-17	8.32667e-17	8.32667e-17	8.32667e-17	139.688	8.32667e-17	8.32667e-17	8.32667e-17	8.32667e-17	771.921	3836.43
17917	60.059	1.29127	4.30408	3.30288	12.5331	1143.24	1.33789	8.32667e-17	7.35175	12.1115	1524.54	3834.09
163764	12.0395	8.32667e-17	2.88075	8.32667e-17	9.75482	898.112	8.32667e-17	1.80339	1.50011	10.6025	1143.69	3832.92
32657	108.204	8.32667e-17	4.30408	4.92996	23.6465	1181.33	8.32667e-17	5.2951	8.32667e-17	6.07552	1243.14	3831.75
172234	69.1107	0.0353364	8.32667e-17	8.18453	30.5923	883.653	1.25767	8.32667e-17	13.2042	31.7289	1228.88	3825.9
162590	36.9584	1.22207	1.45761	1.67616	18.0898	712.013	0.0405159	1.80339	13.2042	22.6747	1063.3	3822.39
166556	52.5424	8.32667e-17	8.32667e-17	8.32667e-17	23.6465	904.403	8.32667e-17	1.80339	1.50011	10.6025	977.344	3821.22
167312	117.049	8.32667e-17	2.88075	3.30288	16.7007	990.044	8.32667e-17	8.32667e-17	4.42566	31.7289	1287.34	3808.35
168838	5.33906	8.32667e-17	1.45761	1.67616	26.4248	1043.91	8.32667e-17	1.80339	2.96278	39.2739	981.756	3808.35
158584	38.3106	8.32667e-17	1.45761	1.67616	34.7598	1926.74	8.32667e-17	3.54902	1.50011	10.6025	1766.81	3806.02
169612	39.9607	8.32667e-17	8.32667e-17	1.67616	26.4248	965.952	8.32667e-17	8.32667e-17	8.32667e-17	22.6747	1188.52	3802.51
97734	40.8546	8.32667e-17	1.45761	1.67616	16.7007	954.034	8.32667e-17	8.32667e-17	5.88868	21.1657	1210.13	3796.66
167449	95.0278	8.32667e-17	1.45761	8.32667e-17	31.9815	938.059	8.32667e-17	1.80339	4.42566	10.6025	1192.5	3795.49
165213	41.015	8.32667e-17	8.32667e-17	8.32667e-17	16.7007	842.294	8.32667e-17	1.80339	5.88868	13.6206	1130	3789.64
168290	141.132	8.32667e-17	2.88075	1.67616	23.6465	1012.82	8.32667e-17	8.32667e-17	2.96278	18.1477	1405.13	3787.3
135011	28.9135	8.32667e-17	1.45761	8.32667e-17	2.80941	529.971	8.32667e-17	1.80339	1.50011	3.05786	974.667	3784.96
121622	25.8879	1.29127	8.32667e-17	8.32667e-17	44.4839	1526.92	1.33789	8.32667e-17	4.42566	27.2018	1223.47	3784.96
163103	20.409	8.32667e-17	8.32667e-17	8.32667e-17	8.36567	554.142	8.32667e-17	1.80339	4.42566	15.1296	1138.44	3782.62
129711	90.5364	8.32667e-17	1.45761	1.67616	22.2573	841.087	8.32667e-17	8.32667e-17	10.278	28.7108	1196.28	3780.28
94263	82.8828	0.0353364	8.32667e-17	1.67616	15.3115	934.485	1.25767	1.80339	1.50011	9.09348	1449.59	3777.94
40870	58.7069	8.32667e-17	8.32667e-17	8.32667e-17	4.19837	735.85	8.32667e-17	1.80339	2.96278	16.6386	1030.92	3774.44
174013	12.1313	8.32667e-17	1.45761	8.32667e-17	76.4345	2193.28	8.32667e-17	8.32667e-17	4.42566	63.418	1256.76	3773.27
111999	75.2062	2.41648	1.45761	4.92996	29.2032	635.75	0.0795823	8.32667e-17	16.1305	25.6928	1642.24	3770.93
163246	9.95212	8.32667e-17	8.32667e-17	3.30288	9.75482	1110.98	8.32667e-17	8.32667e-17	8.32667e-17	8.32667e-17	1290.34	3767.42
167659	54.1466	8.32667e-17	2.88075	8.32667e-17	30.5923	976.79	8.32667e-17	8.32667e-17	7.35175	30.2199	1307.61	3758.06
162827	89.0011	8.32667e-17	1.45761	8.32667e-17	18.0898	793.251	8.32667e-17	1.80339	13.2042	7.58448	1186.67	3753.38
24549	116.338	8.32667e-17	5.72753	6.55721	29.2032	907.419	8.32667e-17	8.32667e-17	16.1305	30.2199	1147.77	3748.7
152557	110.816	8.32667e-17	8.32667e-17	3.30288	18.0898	860.891	8.32667e-17	1.80339	8.32667e-17	13.6206	1130.05	3746.36
174143	38.8377	0.0353364	4.30408	3.30288	29.2032	1541.8	1.25767	3.54902	1.50011	49.837	1364.23	3745.19
169407	62.8318	0.0353364	2.88075	8.32667e-17	34.7598	947.308	1.25767	8.32667e-17	4.42566	13.6206	1165.47	3731.16
165095	52.932	8.32667e-17	2.88075	4.92996	9.75482	923.335	8.32667e-17	8.32667e-17	8.32667e-17	25.6928	1134.29	3731.16
164886	79.6518	8.32667e-17	4.30408	4.92996	34.7598	726.83	8.32667e-17	8.32667e-17	7.35175	16.6386	1179.68	3727.65
166114	50.5257	8.32667e-17	8.32667e-17	3.30288	9.75482	709.333	8.32667e-17	8.32667e-17	1.50011	16.6386	1051.12	3724.14
122912	301.438	8.32667e-17	4.30408	4.92996	16.7007	849.797	8.32667e-17	8.32667e-17	5.88868	13.6206	914.989	3710.11
175379	63.588	8.32667e-17	1.45761	3.30288	18.0898	903.415	8.32667e-17	8.32667e-17	10.278	30.2199	1138.29	3710.11
28586	264.798	2.41648	1.45761	4.92996	36.149	923.457	0.0795823	8.32667e-17	11.7411	40.783	1199.22	3708.94
176331	140.88	8.32667e-17	2.88075	6.55721	20.8682	963.344	8.32667e-17	1.80339	8.81486	21.1657	1215.57	3707.77
171066	10.2733	8.32667e-17	8.32667e-17	8.32667e-17	2.80941	902.215	8.32667e-17	8.32667e-17	8.32667e-17	8.32667e-17	1207.28	3699.58
169745	9.12618	8.32667e-17	1.45761	8.32667e-17	8.32667e-17	760.822	8.32667e-17	8.32667e-17	8.32667e-17	8.32667e-17	914.713	3694.9
162530	3.75422	8.32667e-17	8.32667e-17	3.30288	23.6465	1441.86	8.32667e-17	8.32667e-17	1.50011	22.6747	1236.87	3691.39
164499	96.4943	8.32667e-17	2.88075	6.55721	29.2032	1009.77	8.32667e-17	1.80339	4.42566	18.1477	1175.1	3689.05
169153	38.1731	8.32667e-17	8.32667e-17	1.67616	15.3115	1000.66	8.32667e-17	8.32667e-17	10.278	12.1115	1277.9	3689.05
140602	27.5382	8.32667e-17	2.88075	8.32667e-17	9.75482	863.5	8.32667e-17	1.80339	1.50011	7.58448	1105.71	3687.88
165916	14.8145	8.32667e-17	8.32667e-17	8.32667e-17	11.144	1264.9	8.32667e-17	8.32667e-17	1.50011	4.56662	1159.43	3687.88
164158	86.4347	0.0353364	2.88075	1.67616	27.814	867.493	1.25767	1.80339	4.42566	21.1657	1109.78	3676.19
168745	52.1299	0.0353364	1.45761	1.67616	18.0898	790.444	1.25767	1.80339	5.88868	9.09348	1104.14	3676.19
164700	127.979	8.32667e-17	1.45761	4.92996	18.0898	781.142	8.32667e-17	1.80339	8.81486	15.1296	1101.4	3676.19
153234	5.40795	2.41648	8.32667e-17	8.32667e-17	6.97653	769.052	0.0795823	3.54902	8.32667e-17	3.05786	1032.38	3673.85
131158	54.7195	8.32667e-17	8.32667e-17	1.67616	25.0357	1004.44	8.32667e-17	8.32667e-17	5.88868	21.1657	1165.62	3671.51
103886	282.167	8.32667e-17	5.72753	9.8119	73.6562	1552.98	8.32667e-17	1.80339	23.4462	54.364	1718.89	3668
101203	0.74653	8.32667e-17	8.32667e-17	8.32667e-17	2.80941	870.171	8.32667e-17	8.32667e-17	8.32667e-17	3.05786	1120.61	3665.66
88934	21.1197	1.22207	8.32667e-17	8.32667e-17	13.9223	647.883	0.0405159	8.32667e-17	8.32667e-17	8.32667e-17	876.457	3659.81
87042	4.42042	8.32667e-17	8.32667e-17	8.32667e-17	8.32667e-17	690.795	8.32667e-17	8.32667e-17	8.32667e-17	1.54936	1078.1	3658.64
100404	118.194	8.32667e-17	5.72753	16.3215	70.8779	1843.61	8.32667e-17	8.32667e-17	21.9831	45.31	2353.02	3652.79
168105	85.4722	8.32667e-17	5.72753	3.30288	12.5331	874.554	8.32667e-17	8.32667e-17	13.2042	21.1657	1353.34	3649.28
138645	22.5411	8.32667e-17	1.45761	8.32667e-17	1.42063	916.023	8.32667e-17	1.80339	8.32667e-17	4.56662	844.871	3646.94
155967	134.624	1.22207	2.88075	3.30288	30.5923	1227.07	0.0405159	8.32667e-17	7.35175	16.6386	1585.63	3644.61
90426	26.736	8.32667e-17	1.45761	8.32667e-17	8.36567	685.62	8.32667e-17	7.04137	1.50011	3.05786	1155.19	3641.1
23496	259.964	1.29127	5.72753	8.18453	37.5381	910.252	1.33789	8.32667e-17	14.6674	40.783	1245.19	3631.74
98884	0.258272	8.32667e-17	8.32667e-17	8.32667e-17	20.8682	948.024	8.32667e-17	3.54902	8.32667e-17	8.32667e-17	1644.53	3631.74
167639	50.0903	8.32667e-17	1.45761	1.67616	22.2573	850.378	8.32667e-17	8.32667e-17	7.35175	27.2018	1192.25	3629.4
168036	68.1941	8.32667e-17	8.32667e-17	3.30288	34.7598	1072.17	8.32667e-17	8.32667e-17	11.7411	37.7649	1145.49	3629.4
165088	55.0403	8.32667e-17	1.45761	8.18453	43.0948	1386.9	8.32667e-17	1.80339	10.278	34.7469	1813.36	3616.53
169122	47.1569	8.32667e-17	8.32667e-17	4.92996	19.479	868.803	8.32667e-17	8.32667e-17	1.50011	12.1115	1100.32	3613.03
164125	68.1024	1.22207	8.32667e-17	3.30288	25.0357	820.971	0.0405159	8.32667e-17	4.42566	13.6206	1093.41	3613.03
163853	75.275	0.0694155	1.45761	3.30288	13.9223	874.228	2.4828	8.32667e-17	2.96278	7.58448	1158.5	3611.86
163123	18.3457	8.32667e-17	8.32667e-17	8.32667e-17	9.75482	1116.26	8.32667e-17	8.32667e-17	1.50011	6.07552	1274.12	3608.35
141874	71.7002	0.0353364	5.72753	8.32667e-17	11.144	613.618	1.25767	1.80339	2.96278	15.1296	988.546	3607.18
168839	16.5802	0.0353364	2.88075	8.32667e-17	25.0357	1323.16	1.25767	8.32667e-17	4.42566	25.6928	1051.31	3597.82
24011	20.7988	1.22207	1.45761	8.32667e-17	5.58742	495.015	0.0405159	1.80339	8.32667e-17	4.56662	767.662	3589.63
157699	51.8549	1.22207	1.45761	1.67616	9.75482	763.819	0.0405159	8.32667e-17	2.96278	18.1477	1071.59	3588.46
41527	16.305	8.32667e-17	8.32667e-17	8.32667e-17	18.0898	847.729	8.32667e-17	8.32667e-17	1.50011	19.6567	1196.3	3586.12
168312	79.9955	8.32667e-17	2.88075	1.67616	11.144	698.646	8.32667e-17	1.80339	2.96278	7.58448	1018.62	3581.45
93152	66.865	8.32667e-17	2.88075	3.30288	29.2032	1059.99	8.32667e-17	3.54902	7.35175	61.909	1041.3	3573.26
98578	34.2998	8.32667e-17	2.88075	8.32667e-17	13.9223	920.77	8.32667e-17	8.32667e-17	5.88868	16.6386	1182.98	3569.75
165428	15.984	8.32667e-17	8.32667e-17	1.67616	2.80941	700.861	8.32667e-17	8.32667e-17	2.96278	1.54936	829.341	3566.24
135710	8.36898	8.32667e-17	4.30408	8.32667e-17	5.58742	1142.12	8.32667e-17	1.80339	1.50011	4.56662	934.64	3562.73
162784	25.9108	0.0353364	5.72753	1.67616	16.7007	1127.81	1.25767	8.32667e-17	2.96278	9.09348	1065.8	3555.71
44786	12.1542	8.32667e-17	8.32667e-17	4.92996	20.8682	993.448	8.32667e-17	8.32667e-17	1.50011	30.2199	993.806	3552.2
166687	35.2395	8.32667e-17	8.32667e-17	1.67616	16.7007	725.434	8.32667e-17	1.80339	1.50011	1.54936	1140.45	3551.03
178286	0.837637	8.32667e-17	8.32667e-17	8.32667e-17	1.42063	1157.23	8.32667e-17	8.32667e-17	8.32667e-17	15.1296	1149.74	3542.85
100946	64.4359	8.32667e-17	8.32667e-17	4.92996	25.0357	935.489	8.32667e-17	8.32667e-17	7.35175	28.7108	1241.2	3540.51
166779	45.5985	0.0353364	1.45761	3.30288	34.7598	1022.97	1.25767	1.80339	14.6674	33.2379	1129.14	3527.64
101840	404.366	8.32667e-17	4.30408	4.92996	6.97653	939.439	8.32667e-17	8.32667e-17	4.42566	7.58448	1220.91	3522.96
129762	17.1075	8.32667e-17	1.45761	8.32667e-17	2.80941	825.884	8.32667e-17	1.80339	8.32667e-17	1.54936	912.213	3519.45
162736	3.63934	8.32667e-17	4.30408	8.32667e-17	63.9321	2089.48	8.32667e-17	1.80339	8.32667e-17	63.418	1229.59	3517.12
130266	33.1538	8.32667e-17	2.88075	6.55721	23.6465	828.825	8.32667e-17	8.32667e-17	8.81486	33.2379	1036.63	3515.95
169655	40.3045	8.32667e-17	1.45761	8.32667e-17	8.36567	734.738	8.32667e-17	8.32667e-17	8.32667e-17	9.09348	1144.54	3515.95
23432	22.6098	8.32667e-17	8.32667e-17	8.32667e-17	15.3115	632.181	8.32667e-17	8.32667e-17	5.88868	28.7108	977.802	3503.08
49510	58.2028	8.32667e-17	8.32667e-17	3.30288	23.6465	710.798	8.32667e-17	8.32667e-17	5.88868	12.1115	1124.16	3499.57
169681	20.3173	8.32667e-17	2.88075	8.32667e-17	12.5331	588.484	8.32667e-17	1.80339	2.96278	10.6025	1034.43	3494.89
163135	60.6319	8.32667e-17	1.45761	1.67616	27.814	1265.05	8.32667e-17	3.54902	4.42566	49.837	1235.19	3479.69
88617	30.9993	8.32667e-17	8.32667e-17	1.67616	15.3115	1004.71	8.32667e-17	1.80339	5.88868	12.1115	1315.8	3478.52
163497	4.32854	8.32667e-17	8.32667e-17	6.55721	11.144	1551.48	8.32667e-17	8.32667e-17	8.32667e-17	13.6206	908.276	3477.35
180886	45.3923	8.32667e-17	2.88075	8.32667e-17	13.9223	854.156	8.32667e-17	1.80339	8.32667e-17	7.58448	1082.69	3473.84
147736	93.4695	8.32667e-17	1.45761	8.18453	26.4248	1045.91	8.32667e-17	8.32667e-17	7.35175	16.6386	1318.61	3471.5
172406	65.9484	8.32667e-17	7.15104	8.32667e-17	15.3115	914.041	8.32667e-17	1.80339	5.88868	7.58448	1136.97	3470.33
25162	48.5549	8.32667e-17	7.15104	6.55721	34.7598	1211.54	8.32667e-17	1.80339	7.35175	30.2199	1934.87	3463.31
168879	40.8087	8.32667e-17	8.32667e-17	6.55721	13.9223	724.01	8.32667e-17	3.54902	8.32667e-17	10.6025	1087.69	3459.8
167174	54.6507	8.32667e-17	4.30408	8.32667e-17	9.75482	806.473	8.32667e-17	1.80339	11.7411	15.1296	1152.89	3458.63
118479	81.3017	8.32667e-17	1.45761	4.92996	9.75482	866.217	8.32667e-17	8.32667e-17	2.96278	18.1477	1136.83	3457.46
171401	52.8862	8.32667e-17	1.45761	8.32667e-17	12.5331	940.354	8.32667e-17	8.32667e-17	7.35175	16.6386	1013.96	3449.28
101281	46.6527	8.32667e-17	2.88075	3.30288	26.4248	1012.62	8.32667e-17	5.2951	4.42566	34.7469	1277.93	3442.26
28054	1.38731	0.0353364	8.32667e-17	8.32667e-17	11.144	1069.98	1.25767	8.32667e-17	8.32667e-17	8.32667e-17	1416.1	3438.75
151589	68.1712	0.0353364	2.88075	4.92996	20.8682	942.054	1.25767	8.32667e-17	7.35175	16.6386	1197.92	3437.58
143675	4.92571	8.32667e-17	1.45761	8.32667e-17	4.19837	569.629	8.32667e-17	1.80339	1.50011	1.54936	899.121	3434.07
171422	34.3227	8.32667e-17	2.88075	1.67616	2.80941	645.387	8.32667e-17	1.80339	8.32667e-17	1.54936	945.4	3432.9
46402	0.279302	8.32667e-17	1.45761	8.32667e-17	1.42063	237.293	8.32667e-17	8.32667e-17	8.32667e-17	1.54936	534.99	3431.73
137291	50.9382	8.32667e-17	8.32667e-17	8.32667e-17	18.0898	697.442	8.32667e-17	8.32667e-17	7.35175	7.58448	1082.18	3431.73
94207	59.0048	8.32667e-17	1.45761	1.67616	19.479	786.291	8.32667e-17	8.32667e-17	7.35175	13.6206	1020.27	3429.39
167153	15.4337	8.32667e-17	8.32667e-17	8.32667e-17	16.7007	1075.06	8.32667e-17	8.32667e-17	4.42566	16.6386	1269.96	3425.88
168652	72.021	1.22207	1.45761	1.67616	33.3707	795.902	0.0405159	3.54902	7.35175	18.1477	1183.97	3424.71
177711	45.9423	1.29127	2.88075	4.92996	25.0357	1108.46	1.33789	8.32667e-17	7.35175	9.09348	1374.23	3422.37
168377	29.0511	8.32667e-17	2.88075	8.32667e-17	5.58742	585.531	8.32667e-17	1.80339	1.50011	4.56662	888.373	3417.7
45618	0.883278	8.32667e-17	8.32667e-17	8.32667e-17	5.58742	523.36	8.32667e-17	8.32667e-17	8.32667e-17	4.56662	988.161	3417.7
167413	81.3934	1.22207	2.88075	3.30288	12.5331	693.415	0.0405159	1.80339	7.35175	10.6025	1059.18	3413.02
165942	11.145	8.32667e-17	1.45761	8.32667e-17	4.19837	715.616	8.32667e-17	8.32667e-17	8.32667e-17	7.58448	888.872	3413.02
43238	57.5153	0.0353364	8.32667e-17	3.30288	23.6465	657.393	1.25767	1.80339	7.35175	21.1657	972.489	3411.85
183312	44.086	8.32667e-17	8.32667e-17	1.67616	4.19837	701.217	8.32667e-17	8.32667e-17	4.42566	3.05786	978.059	3408.34
88011	260.582	1.22207	4.30408	4.92996	41.7056	1278.81	0.0405159	3.54902	11.7411	39.2739	1516.7	3406
166331	61.7548	8.32667e-17	5.72753	3.30288	18.0898	840.816	8.32667e-17	8.32667e-17	5.88868	21.1657	1054.25	3403.66
168467	2.05357	8.32667e-17	8.32667e-17	8.32667e-17	8.32667e-17	622.686	8.32667e-17	8.32667e-17	1.50011	8.32667e-17	885.821	3400.15
165220	39.8003	8.32667e-17	8.32667e-17	1.67616	15.3115	816.541	8.32667e-17	1.80339	4.42566	18.1477	893.257	3396.64
146662	19.6983	8.32667e-17	1.45761	1.67616	44.4839	1193.94	8.32667e-17	8.32667e-17	8.32667e-17	34.7469	930.688	3394.3
158695	113.337	1.29127	1.45761	3.30288	12.5331	722.563	1.33789	1.80339	2.96278	12.1115	1026.82	3393.13
162121	45.0256	1.22207	8.32667e-17	4.92996	26.4248	898.014	0.0405159	1.80339	2.96278	19.6567	1093.64	3393.13
168882	77.3832	8.32667e-17	2.88075	1.67616	13.9223	1023.03	8.32667e-17	8.32667e-17	8.32667e-17	9.09348	1157.54	3390.79
129996	33.4747	0.0353364	8.32667e-17	3.30288	22.2573	1056.07	1.25767	8.32667e-17	4.42566	25.6928	1071.05	3388.45
164250	75.9854	8.32667e-17	8.32667e-17	3.30288	25.0357	844.298	8.32667e-17	8.32667e-17	5.88868	13.6206	843.32	3386.12
162048	33.085	0.0353364	8.32667e-17	1.67616	16.7007	755.824	1.25767	1.80339	1.50011	9.09348	1058.04	3384.95
165898	77.1311	8.32667e-17	1.45761	3.30288	30.5923	1101.41	8.32667e-17	1.80339	2.96278	18.1477	1146.91	3374.42
167338	54.9028	8.32667e-17	2.88075	8.32667e-17	33.3707	796.947	8.32667e-17	8.32667e-17	1.50011	13.6206	1035.18	3370.91
168693	55.934	1.22207	1.45761	8.32667e-17	11.144	803.488	0.0405159	1.80339	4.42566	6.07552	989.219	3370.91
165767	44.7277	8.32667e-17	1.45761	1.67616	13.9223	1021.61	8.32667e-17	1.80339	2.96278	7.58448	1112.9	3366.23
178102	16.4197	1.22207	4.30408	8.32667e-17	19.479	927.017	0.0405159	5.2951	4.42566	12.1115	990.929	3356.87
161307	1.96164	8.32667e-17	8.32667e-17	8.32667e-17	8.36567	880.621	8.32667e-17	8.32667e-17	1.50011	4.56662	1034.08	3353.37
182541	9.01145	8.32667e-17	8.32667e-17	8.32667e-17	8.36567	783.369	8.32667e-17	8.32667e-17	8.32667e-17	3.05786	903.969	3344.01
164698	38.494	8.32667e-17	1.45761	9.8119	36.149	976.616	8.32667e-17	8.32667e-17	7.35175	36.2559	1207.48	3340.5
124025	7.97887	8.32667e-17	1.45761	1.67616	15.3115	1035.95	8.32667e-17	1.80339	1.50011	30.2199	985.795	3340.5
166820	2.74311	8.32667e-17	8.32667e-17	8.32667e-17	2.80941	531.323	8.32667e-17	8.32667e-17	8.32667e-17	3.05786	988.197	3333.48
160082	20.8446	8.32667e-17	4.30408	6.55721	31.9815	811.38	8.32667e-17	1.80339	2.96278	21.1657	955.437	3332.31
175556	35.652	8.32667e-17	2.88075	8.32667e-17	12.5331	547.206	8.32667e-17	8.32667e-17	2.96278	9.09348	965.278	3327.63
164510	97.1817	1.22207	4.30408	4.92996	8.36567	638.773	0.0405159	8.32667e-17	2.96278	7.58448	956.191	3325.29
168810	17.6808	8.32667e-17	8.32667e-17	3.30288	19.479	1038.88	8.32667e-17	1.80339	1.50011	24.1838	1110.24	3325.29
163579	73.2813	8.32667e-17	1.45761	8.32667e-17	11.144	789.972	8.32667e-17	1.80339	1.50011	7.58448	889.119	3319.45
133417	0.74653	8.32667e-17	8.32667e-17	8.32667e-17	4.19837	969.264	8.32667e-17	1.80339	4.42566	3.05786	884.215	3312.43
91320	43.0547	2.41648	8.32667e-17	8.32667e-17	11.144	886.093	0.0795823	8.32667e-17	5.88868	9.09348	1111.19	3307.75
157102	11.5808	0.0694155	8.32667e-17	1.67616	6.97653	1625.03	2.4828	8.32667e-17	1.50011	15.1296	1912.6	3296.05
168689	76.5353	8.32667e-17	1.45761	3.30288	8.36567	620.1	8.32667e-17	8.32667e-17	5.88868	13.6206	915.554	3293.71
36639	55.3611	8.32667e-17	1.45761	8.32667e-17	6.97653	860.408	8.32667e-17	8.32667e-17	4.42566	4.56662	909.611	3291.37
162539	28.7302	8.32667e-17	8.32667e-17	8.32667e-17	12.5331	737.133	8.32667e-17	3.54902	8.32667e-17	9.09348	1009.29	3290.21
115534	1164.85	8.32667e-17	17.1159	11.4393	30.5923	830.15	8.32667e-17	1.80339	5.88868	36.2559	1035.28	3285.53
166802	68.3774	8.32667e-17	2.88075	8.32667e-17	16.7007	726.405	8.32667e-17	8.32667e-17	4.42566	13.6206	960.569	3284.36
165749	78.1852	8.32667e-17	1.45761	4.92996	11.144	851.491	8.32667e-17	8.32667e-17	2.96278	7.58448	1078.63	3283.19
176195	134.807	8.32667e-17	4.30408	3.30288	12.5331	817.923	8.32667e-17	8.32667e-17	1.50011	10.6025	914.893	3267.98
162329	35.2624	8.32667e-17	8.32667e-17	4.92996	20.8682	643.993	8.32667e-17	8.32667e-17	7.35175	19.6567	915.648	3267.98
165710	130.591	8.32667e-17	2.88075	3.30288	19.479	755.875	8.32667e-17	8.32667e-17	11.7411	15.1296	1083.74	3265.64
180106	107.402	8.32667e-17	1.45761	1.67616	20.8682	741.402	8.32667e-17	1.80339	11.7411	18.1477	1158.09	3255.12
164881	48.234	8.32667e-17	8.32667e-17	3.30288	13.9223	698.812	8.32667e-17	8.32667e-17	4.42566	10.6025	1105.18	3250.44
144598	73.3959	8.32667e-17	8.32667e-17	8.32667e-17	22.2573	807.749	8.32667e-17	1.80339	16.1305	10.6025	1124.48	3248.1
162378	86.5492	8.32667e-17	1.45761	1.67616	5.58742	823.801	8.32667e-17	8.32667e-17	2.96278	12.1115	1186.76	3238.74
164268	103.575	8.32667e-17	1.45761	4.92996	16.7007	794.479	8.32667e-17	8.32667e-17	5.88868	33.2379	1131.21	3238.74
168153	145.233	1.29127	8.57457	9.8119	55.5972	1365.2	1.33789	7.04137	17.5937	43.801	1501.98	3236.4
133795	37.1188	8.32667e-17	1.45761	1.67616	20.8682	824.773	8.32667e-17	8.32667e-17	2.96278	21.1657	1005.51	3236.4
165069	43.7651	8.32667e-17	8.32667e-17	8.18453	11.144	709.249	8.32667e-17	1.80339	16.1305	30.2199	1009.19	3232.89
41058	46.3777	8.32667e-17	8.32667e-17	1.67616	4.19837	765.115	8.32667e-17	8.32667e-17	2.96278	10.6025	1055.36	3231.72
163806	22.1972	8.32667e-17	1.45761	1.67616	11.144	863.255	8.32667e-17	8.32667e-17	8.32667e-17	10.6025	989.399	3230.55
121460	42.4817	0.0353364	2.88075	1.67616	11.144	589.761	1.25767	8.32667e-17	4.42566	7.58448	1007.38	3216.52
158658	74.5875	8.32667e-17	8.32667e-17	3.30288	40.3165	1384.26	8.32667e-17	1.80339	11.7411	18.1477	1829.6	3214.18
163319	95.2569	8.32667e-17	1.45761	3.30288	68.0996	1754.31	8.32667e-17	3.54902	19.0568	36.2559	2163.3	3213.01
165248	148.9	1.22207	5.72753	4.92996	30.5923	539.686	0.0405159	3.54902	11.7411	18.1477	627.38	3211.84
167987	37.0272	8.32667e-17	1.45761	3.30288	8.36567	910.997	8.32667e-17	8.32667e-17	8.32667e-17	8.32667e-17	957.078	3211.84
167157	3.89207	8.32667e-17	8.32667e-17	1.67616	2.80941	978.741	8.32667e-17	8.32667e-17	8.32667e-17	1.54936	954.551	3209.5
168350	57.5382	8.32667e-17	1.45761	8.32667e-17	13.9223	814.026	8.32667e-17	8.32667e-17	1.50011	7.58448	951.389	3205.99
164504	63.2901	8.32667e-17	2.88075	1.67616	29.2032	751.72	8.32667e-17	8.32667e-17	8.32667e-17	7.58448	999.87	3204.82
175595	37.2334	8.32667e-17	8.32667e-17	3.30288	15.3115	864.379	8.32667e-17	1.80339	8.32667e-17	1.54936	904.214	3203.65
168014	36.0875	8.32667e-17	8.32667e-17	8.32667e-17	8.36567	569.711	8.32667e-17	8.32667e-17	8.81486	9.09348	936.979	3201.31
166591	86.2284	1.22207	8.32667e-17	3.30288	19.479	862.297	0.0405159	8.32667e-17	4.42566	16.6386	1171.99	3200.14
165127	66.8879	8.32667e-17	1.45761	6.55721	22.2573	839.569	8.32667e-17	8.32667e-17	4.42566	18.1477	1094.82	3197.8
43080	45.2548	0.0694155	8.32667e-17	1.67616	29.2032	757.069	2.4828	1.80339	5.88868	19.6567	1017.47	3197.8
184541	4.37448	8.32667e-17	8.32667e-17	8.32667e-17	4.19837	755.587	8.32667e-17	8.32667e-17	1.50011	7.58448	947.146	3197.8
166427	69.7065	8.32667e-17	2.88075	1.67616	6.97653	709.074	8.32667e-17	8.32667e-17	1.50011	9.09348	929.409	3194.29
106640	38.3335	1.22207	1.45761	8.32667e-17	11.144	653.444	0.0405159	8.32667e-17	2.96278	10.6025	988.702	3194.29
139524	0.279302	8.32667e-17	1.45761	8.32667e-17	8.32667e-17	326.655	8.32667e-17	8.32667e-17	8.32667e-17	1.54936	788.32	3193.13
177520	110.747	8.32667e-17	8.32667e-17	1.67616	9.75482	834.146	8.32667e-17	8.32667e-17	7.35175	15.1296	1040.7	3191.96
162092	47.0652	8.32667e-17	8.32667e-17	8.32667e-17	9.75482	592.122	8.32667e-17	8.32667e-17	2.96278	7.58448	869.474	3190.79
104117	61.0444	1.22207	2.88075	8.32667e-17	26.4248	951.035	0.0405159	8.32667e-17	2.96278	12.1115	1038.33	3189.62
166423	76.3749	8.32667e-17	4.30408	8.32667e-17	8.36567	673.383	8.32667e-17	1.80339	1.50011	9.09348	1000.95	3183.77
102085	7.22152	8.32667e-17	4.30408	8.32667e-17	6.97653	587.492	8.32667e-17	8.32667e-17	1.50011	8.32667e-17	642.444	3182.6
165740	93.2862	8.32667e-17	2.88075	6.55721	23.6465	831.317	8.32667e-17	1.80339	8.81486	34.7469	962.259	3179.09
30998	0.678401	8.32667e-17	8.32667e-17	8.32667e-17	6.97653	988.246	8.32667e-17	8.32667e-17	8.32667e-17	8.32667e-17	1043.83	3173.24
163601	77.0624	8.32667e-17	1.45761	8.32667e-17	6.97653	714.425	8.32667e-17	8.32667e-17	2.96278	1.54936	947.005	3172.07
33758	53.2757	8.32667e-17	1.45761	8.32667e-17	12.5331	676.213	8.32667e-17	8.32667e-17	2.96278	3.05786	1091.58	3165.05
169097	9.37856	8.32667e-17	1.45761	8.32667e-17	18.0898	948.023	8.32667e-17	8.32667e-17	2.96278	12.1115	889.569	3165.05
112971	48.5549	1.22207	1.45761	8.32667e-17	9.75482	761.134	0.0405159	1.80339	2.96278	10.6025	1056.7	3162.71
165048	16.8095	8.32667e-17	4.30408	1.67616	12.5331	677.202	8.32667e-17	8.32667e-17	1.50011	4.56662	925.238	3156.87
108744	3.40956	0.0694155	8.32667e-17	1.67616	13.9223	1451.23	2.4828	3.54902	2.96278	1.54936	1274.77	3154.53
167576	51.0299	0.0353364	8.32667e-17	8.32667e-17	31.9815	923.105	1.25767	1.80339	4.42566	15.1296	1023.38	3153.36
113529	41.3358	1.22207	8.32667e-17	4.92996	25.0357	2310.21	0.0405159	8.32667e-17	1.50011	16.6386	2082.75	3148.68
75075	40.9004	0.0353364	8.32667e-17	1.67616	34.7598	726.462	1.25767	1.80339	5.88868	24.1838	986.261	3148.68
21581	11.4202	8.32667e-17	8.32667e-17	8.32667e-17	16.7007	747.474	8.32667e-17	1.80339	1.50011	1.54936	886.277	3148.68
166469	63.588	8.32667e-17	1.45761	8.32667e-17	34.7598	827.667	8.32667e-17	8.32667e-17	5.88868	21.1657	1121.84	3146.34
164982	24.3291	8.32667e-17	1.45761	3.30288	26.4248	1102.58	8.32667e-17	1.80339	2.96278	24.1838	1071.16	3144
44495	2.6052	8.32667e-17	8.32667e-17	1.67616	6.97653	751.723	8.32667e-17	8.32667e-17	1.50011	10.6025	1001.22	3142.83
92194	57.859	8.32667e-17	2.88075	6.55721	12.5331	800.811	8.32667e-17	8.32667e-17	4.42566	10.6025	979.744	3139.32
131533	18.5291	8.32667e-17	8.32667e-17	6.55721	5.58742	524.58	8.32667e-17	1.80339	2.96278	6.07552	932.722	3139.32
130543	16.4426	8.32667e-17	8.32667e-17	8.32667e-17	6.97653	601.323	8.32667e-17	1.80339	8.32667e-17	4.56662	833.014	3136.98
162571	7.22152	8.32667e-17	8.32667e-17	6.55721	23.6465	1000.04	8.32667e-17	1.80339	7.35175	36.2559	972.184	3134.64
144891	23.8019	8.32667e-17	1.45761	3.30288	19.479	1039.41	8.32667e-17	1.80339	8.32667e-17	1.54936	1413.32	3131.13
160432	10.755	8.32667e-17	8.32667e-17	8.32667e-17	2.80941	435.77	8.32667e-17	8.32667e-17	8.32667e-17	9.09348	985.03	3125.29
179067	43.2151	8.32667e-17	1.45761	1.67616	26.4248	774.133	8.32667e-17	8.32667e-17	11.7411	24.1838	928.277	3124.12
168100	67.7816	8.32667e-17	1.45761	3.30288	20.8682	685.065	8.32667e-17	8.32667e-17	4.42566	12.1115	882.003	3121.78
86754	150.664	8.32667e-17	8.32667e-17	8.32667e-17	30.5923	787.836	8.32667e-17	1.80339	1.50011	39.2739	1129.83	3119.44
99499	39.9837	8.32667e-17	1.45761	1.67616	23.6465	1209.86	8.32667e-17	8.32667e-17	1.50011	30.2199	918.547	3118.27
157444	63.7714	8.32667e-17	2.88075	4.92996	25.0357	971.504	8.32667e-17	8.32667e-17	5.88868	16.6386	1325.18	3113.59
166165	130.454	8.32667e-17	1.45761	3.30288	19.479	895.318	8.32667e-17	8.32667e-17	11.7411	12.1115	1074.69	3113.59
166896	7.47398	8.32667e-17	8.32667e-17	8.32667e-17	33.3707	981.365	8.32667e-17	8.32667e-17	1.50011	22.6747	941.035	3111.25
27640	3.91504	2.41648	8.32667e-17	8.32667e-17	23.6465	1176.39	0.0795823	8.32667e-17	8.32667e-17	8.32667e-17	829.235	3110.08
162896	169.637	8.32667e-17	4.30408	6.55721	34.7598	1096.64	8.32667e-17	1.80339	10.278	24.1838	1468.94	3106.57
43421	35.2166	2.41648	8.32667e-17	1.67616	15.3115	934.083	0.0795823	1.80339	8.81486	10.6025	1197.9	3105.4
41041	113.612	8.32667e-17	8.32667e-17	8.32667e-17	13.9223	581.656	8.32667e-17	8.32667e-17	4.42566	6.07552	937.03	3105.4
128760	71.2648	8.32667e-17	8.32667e-17	8.32667e-17	15.3115	622.794	8.32667e-17	1.80339	8.81486	12.1115	933.142	3105.4
167950	8.27719	8.32667e-17	1.45761	8.32667e-17	8.36567	662.031	8.32667e-17	8.32667e-17	2.96278	3.05786	712.981	3096.05
163701	14.3559	8.32667e-17	8.32667e-17	8.32667e-17	13.9223	667.576	8.32667e-17	8.32667e-17	4.42566	9.09348	792.727	3086.69
110193	5.54572	8.32667e-17	8.32667e-17	8.32667e-17	1.42063	434.074	8.32667e-17	8.32667e-17	1.50011	8.32667e-17	795.727	3074.99
165415	62.3735	8.32667e-17	8.32667e-17	3.30288	15.3115	832.815	8.32667e-17	8.32667e-17	7.35175	15.1296	1039.35	3070.31
163194	34.0248	8.32667e-17	8.32667e-17	3.30288	13.9223	655.983	8.32667e-17	8.32667e-17	5.88868	13.6206	934.623	3066.8
168133	26.438	8.32667e-17	8.32667e-17	8.32667e-17	13.9223	689.084	8.32667e-17	8.32667e-17	2.96278	3.05786	896.889	3066.8
168743	73.2813	8.32667e-17	2.88075	4.92996	23.6465	952.161	8.32667e-17	3.54902	4.42566	27.2018	950.427	3065.63
166919	52.5882	8.32667e-17	8.32667e-17	1.67616	19.479	717.12	8.32667e-17	8.32667e-17	8.81486	30.2199	964.593	3065.63
168048	101.994	8.32667e-17	1.45761	3.30288	9.75482	661.069	8.32667e-17	8.32667e-17	7.35175	12.1115	841.36	3060.96
162607	11.7643	8.32667e-17	8.32667e-17	6.55721	6.97653	608.319	8.32667e-17	8.32667e-17	4.42566	19.6567	993.935	3059.79
168885	38.2648	8.32667e-17	1.45761	1.67616	18.0898	698.459	8.32667e-17	8.32667e-17	5.88868	16.6386	932.075	3058.62
127456	67.2087	8.32667e-17	8.32667e-17	4.92996	19.479	703.963	8.32667e-17	8.32667e-17	11.7411	18.1477	1021.34	3052.77
98049	34.804	8.32667e-17	1.45761	3.30288	9.75482	920.415	8.32667e-17	8.32667e-17	8.32667e-17	1.54936	1008.49	3050.43
89051	34.5061	8.32667e-17	1.45761	1.67616	15.3115	897.883	8.32667e-17	3.54902	4.42566	27.2018	1031.42	3049.26
146665	1.20375	8.32667e-17	8.32667e-17	8.32667e-17	4.19837	636.229	8.32667e-17	8.32667e-17	8.32667e-17	3.05786	1010.27	3046.92
168289	23.6873	8.32667e-17	1.45761	8.32667e-17	27.814	828.878	8.32667e-17	8.32667e-17	10.278	33.2379	1062.33	3044.58
90318	0.0464846	8.32667e-17	8.32667e-17	8.32667e-17	8.32667e-17	519.396	8.32667e-17	8.32667e-17	8.32667e-17	1.54936	997.61	3043.41
131429	66.1088	8.32667e-17	1.45761	1.67616	19.479	747.607	8.32667e-17	8.32667e-17	1.50011	16.6386	941.71	3042.24
166712	1.47915	8.32667e-17	8.32667e-17	1.67616	12.5331	337.837	8.32667e-17	8.32667e-17	8.32667e-17	3.05786	518.251	3036.39
165482	46.6298	1.22207	4.30408	1.67616	13.9223	586.915	0.0405159	8.32667e-17	2.96278	16.6386	914.066	3035.22
148034	116.751	8.32667e-17	1.45761	4.92996	11.144	632.885	8.32667e-17	1.80339	1.50011	3.05786	729.083	3032.88
161885	0.431353	8.32667e-17	8.32667e-17	8.32667e-17	2.80941	557.412	8.32667e-17	8.32667e-17	1.50011	8.32667e-17	785.522	3030.55
164054	41.1983	8.32667e-17	8.32667e-17	1.67616	26.4248	823.427	8.32667e-17	8.32667e-17	13.2042	12.1115	997.394	3029.38
41995	61.3423	8.32667e-17	1.45761	3.30288	22.2573	710.472	8.32667e-17	3.54902	2.96278	25.6928	960.513	3024.7
178024	50.1591	8.32667e-17	2.88075	4.92996	5.58742	564.035	8.32667e-17	8.32667e-17	2.96278	9.09348	781.497	3023.53
158154	16.305	8.32667e-17	1.45761	3.30288	18.0898	669.092	8.32667e-17	8.32667e-17	1.50011	3.05786	864.37	3023.53
165562	29.1657	8.32667e-17	8.32667e-17	6.55721	16.7007	545.554	8.32667e-17	1.80339	4.42566	9.09348	817.906	3023.53
93247	96.9755	1.22207	1.45761	4.92996	19.479	585.666	0.0405159	8.32667e-17	5.88868	18.1477	950.568	3022.36
166641	70.0044	8.32667e-17	2.88075	3.30288	11.144	719.724	8.32667e-17	1.80339	1.50011	4.56662	941.615	3021.19
168782	99.5878	8.32667e-17	8.57457	1.67616	27.814	540.522	8.32667e-17	8.32667e-17	7.35175	21.1657	940.908	3020.02
163030	62.7631	8.32667e-17	8.32667e-17	8.32667e-17	15.3115	681.242	8.32667e-17	8.32667e-17	8.81486	12.1115	950.943	3020.02
102969	128.804	8.32667e-17	1.45761	3.30288	19.479	763.743	8.32667e-17	1.80339	13.2042	18.1477	1033.72	3013
165007	76.3291	8.32667e-17	1.45761	8.32667e-17	19.479	645.572	8.32667e-17	8.32667e-17	1.50011	15.1296	1036.01	3009.49
135946	7.63463	8.32667e-17	1.45761	8.32667e-17	1.42063	818.156	8.32667e-17	8.32667e-17	8.32667e-17	3.05786	1016.31	3008.32
102523	34.0248	8.32667e-17	2.88075	1.67616	4.19837	519.214	8.32667e-17	8.32667e-17	8.32667e-17	6.07552	904.303	3007.15
163111	28.7531	8.32667e-17	8.32667e-17	3.30288	9.75482	619.957	8.32667e-17	1.80339	4.42566	1.54936	854.718	3005.98
128371	69.9357	8.32667e-17	2.88075	3.30288	29.2032	867.504	8.32667e-17	1.80339	2.96278	18.1477	1115.19	2991.95
163714	1.82375	8.32667e-17	1.45761	8.32667e-17	2.80941	663.769	8.32667e-17	8.32667e-17	8.32667e-17	8.32667e-17	858.943	2988.44
151313	43.3297	8.32667e-17	1.45761	1.67616	25.0357	779.24	8.32667e-17	1.80339	4.42566	16.6386	847.177	2980.25
165578	76.1458	8.32667e-17	8.32667e-17	3.30288	13.9223	693.191	8.32667e-17	8.32667e-17	4.42566	6.07552	950.986	2979.08
143957	22.8391	8.32667e-17	1.45761	8.32667e-17	25.0357	1035.52	8.32667e-17	8.32667e-17	2.96278	33.2379	823.533	2976.74
165966	43.811	8.32667e-17	8.32667e-17	1.67616	13.9223	700.986	8.32667e-17	8.32667e-17	5.88868	9.09348	878.005	2974.4
168775	57.2174	8.32667e-17	8.32667e-17	3.30288	22.2573	764.831	8.32667e-17	1.80339	5.88868	9.09348	925.542	2966.22
47173	42.3671	8.32667e-17	1.45761	1.67616	31.9815	713.137	8.32667e-17	8.32667e-17	5.88868	19.6567	964.579	2962.71
111952	164.733	1.35092	5.72753	8.32667e-17	6.97653	411.237	2.57129	8.32667e-17	4.42566	7.58448	363.663	2960.37
171825	70.8294	0.0353364	1.45761	8.32667e-17	13.9223	770.215	1.25767	8.32667e-17	4.42566	12.1115	956.659	2960.37
110413	49.0132	8.32667e-17	2.88075	4.92996	30.5923	883.374	8.32667e-17	1.80339	8.81486	25.6928	1080.07	2949.84
148551	104.331	8.32667e-17	8.32667e-17	8.32667e-17	18.0898	721.188	8.32667e-17	1.80339	4.42566	21.1657	1003.82	2947.5
91378	50.8236	0.0353364	5.72753	1.67616	22.2573	843.458	1.25767	8.32667e-17	1.50011	33.2379	1047.49	2946.33
162860	5.79828	8.32667e-17	8.32667e-17	8.32667e-17	4.19837	994.196	8.32667e-17	8.32667e-17	8.32667e-17	3.05786	774.772	2945.16
168523	59.784	0.0353364	1.45761	8.32667e-17	20.8682	723.569	1.25767	8.32667e-17	2.96278	10.6025	883.492	2940.48
23388	14.4018	8.32667e-17	8.32667e-17	3.30288	1.42063	319.797	8.32667e-17	8.32667e-17	8.32667e-17	1.54936	682.858	2938.14
153328	36.6834	8.32667e-17	8.32667e-17	1.67616	11.144	490.036	8.32667e-17	8.32667e-17	8.32667e-17	6.07552	910.925	2932.3
138000	71.4023	8.32667e-17	2.88075	6.55721	33.3707	804.429	8.32667e-17	3.54902	11.7411	46.819	832.386	2929.96
183551	9.05734	8.32667e-17	1.45761	1.67616	9.75482	532.612	8.32667e-17	8.32667e-17	1.50011	7.58448	967.917	2929.96
121952	48.2111	8.32667e-17	2.88075	8.32667e-17	11.144	718.365	8.32667e-17	8.78774	8.81486	6.07552	928.089	2927.62
116732	25.3836	8.32667e-17	2.88075	3.30288	16.7007	793.754	8.32667e-17	8.32667e-17	8.32667e-17	18.1477	813.429	2925.28
23978	76.8561	8.32667e-17	1.45761	8.32667e-17	33.3707	1526.21	8.32667e-17	1.80339	4.42566	9.09348	1592.95	2925.28
31101	51.4882	8.32667e-17	1.45761	1.67616	29.2032	603.943	8.32667e-17	8.32667e-17	7.35175	33.2379	819.509	2925.28
162800	51.2361	8.32667e-17	1.45761	3.30288	15.3115	697.484	8.32667e-17	8.32667e-17	7.35175	9.09348	1105.18	2924.11
159747	133.272	8.32667e-17	2.88075	3.30288	23.6465	795.405	8.32667e-17	1.80339	4.42566	24.1838	939.161	2921.77
92211	85.2431	8.32667e-17	4.30408	8.32667e-17	11.144	675.846	8.32667e-17	8.32667e-17	2.96278	19.6567	913.064	2920.6
29794	2.81206	1.22207	8.32667e-17	1.67616	4.19837	494.708	0.0405159	1.80339	8.32667e-17	8.32667e-17	660.93	2917.09
166785	43.7422	8.32667e-17	4.30408	4.92996	25.0357	789.812	8.32667e-17	8.32667e-17	8.81486	10.6025	828.286	2914.75
164481	52.8174	8.32667e-17	1.45761	3.30288	20.8682	662.441	8.32667e-17	8.32667e-17	10.278	13.6206	858.938	2912.41
167017	82.3787	8.32667e-17	8.32667e-17	1.67616	13.9223	708.64	8.32667e-17	8.32667e-17	4.42566	25.6928	763.144	2911.24
21139	48.7153	8.32667e-17	2.88075	4.92996	13.9223	660.225	8.32667e-17	8.32667e-17	8.81486	13.6206	1061.76	2910.07
180272	25.1314	8.32667e-17	8.32667e-17	1.67616	22.2573	692.973	8.32667e-17	8.32667e-17	2.96278	12.1115	859.051	2908.9
40993	131.049	8.32667e-17	1.45761	1.67616	18.0898	910.174	8.32667e-17	8.32667e-17	7.35175	16.6386	1200.54	2903.06
169395	1.45619	8.32667e-17	8.32667e-17	8.32667e-17	5.58742	449.678	8.32667e-17	8.32667e-17	8.32667e-17	3.05786	678.256	2896.04
167237	22.2889	8.32667e-17	1.45761	3.30288	9.75482	472.337	8.32667e-17	8.32667e-17	8.32667e-17	6.07552	718.904	2894.87
162723	64.5505	8.32667e-17	1.45761	8.32667e-17	15.3115	701.296	8.32667e-17	1.80339	10.278	10.6025	1015.92	2892.53
167825	16.1674	1.22207	4.30408	1.67616	31.9815	1129.15	0.0405159	8.32667e-17	8.32667e-17	21.1657	1071.22	2886.68
27084	9.24089	0.0353364	8.32667e-17	8.32667e-17	20.8682	1543.39	1.25767	1.80339	8.32667e-17	13.6206	1518.53	2885.51
121531	55.4528	8.32667e-17	1.45761	3.30288	12.5331	587.969	8.32667e-17	8.32667e-17	4.42566	15.1296	800.52	2884.34
168767	75.9624	8.32667e-17	4.30408	1.67616	15.3115	743.652	8.32667e-17	8.32667e-17	2.96278	15.1296	953.866	2877.32
169668	11.4432	8.32667e-17	8.32667e-17	8.32667e-17	20.8682	1156.83	8.32667e-17	1.80339	8.32667e-17	19.6567	968.481	2877.32
169389	26.1858	1.22207	1.45761	8.18453	15.3115	650.691	0.0405159	8.32667e-17	7.35175	55.873	942.716	2871.47
163972	54.582	8.32667e-17	2.88075	3.30288	19.479	702.269	8.32667e-17	8.32667e-17	2.96278	12.1115	860.436	2865.63
145012	26.9652	8.32667e-17	1.45761	8.32667e-17	12.5331	610.354	8.32667e-17	8.32667e-17	2.96278	16.6386	738.451	2860.95
165751	0.104495	8.32667e-17	8.32667e-17	1.67616	2.80941	313.447	8.32667e-17	8.32667e-17	8.32667e-17	1.54936	815.27	2855.1
165311	24.5583	8.32667e-17	1.45761	1.67616	19.479	555.037	8.32667e-17	1.80339	5.88868	13.6206	901.761	2852.76
160657	91.7738	8.32667e-17	1.45761	1.67616	16.7007	669.119	8.32667e-17	1.80339	7.35175	16.6386	875.185	2851.59
115694	43.6276	8.32667e-17	1.45761	3.30288	9.75482	663.707	8.32667e-17	1.80339	7.35175	18.1477	834.612	2849.25
177749	41.7713	8.32667e-17	1.45761	1.67616	8.36567	748.771	8.32667e-17	8.32667e-17	2.96278	7.58448	874.114	2846.91
28633	15.5942	8.32667e-17	4.30408	1.67616	5.58742	402.24	8.32667e-17	8.32667e-17	8.32667e-17	8.32667e-17	792.845	2844.57
167631	53.6653	8.32667e-17	8.32667e-17	1.67616	9.75482	645.342	8.32667e-17	1.80339	4.42566	10.6025	925.118	2844.57
99152	93.1717	8.32667e-17	8.32667e-17	8.32667e-17	5.58742	590.547	8.32667e-17	8.32667e-17	8.32667e-17	12.1115	772.151	2844.57
32164	21.7846	8.32667e-17	8.32667e-17	1.67616	36.149	909.64	8.32667e-17	1.80339	2.96278	27.2018	944.905	2841.06
147782	20.0422	2.49278	1.45761	1.67616	23.6465	604.08	1.40718	8.32667e-17	7.35175	21.1657	874.931	2837.56
180544	41.2212	8.32667e-17	1.45761	8.32667e-17	8.36567	561.153	8.32667e-17	5.2951	2.96278	3.05786	701.764	2836.39
171681	0.0883609	8.32667e-17	8.32667e-17	8.32667e-17	23.6465	1064.85	8.32667e-17	8.32667e-17	8.32667e-17	7.58448	858.751	2836.39
168423	64.8026	8.32667e-17	1.45761	1.67616	8.36567	661.287	8.32667e-17	8.32667e-17	5.88868	9.09348	931.939	2832.88
166535	27.6529	8.32667e-17	2.88075	3.30288	11.144	640.1	8.32667e-17	8.32667e-17	1.50011	9.09348	956.197	2831.71
115897	20.111	8.32667e-17	1.45761	8.32667e-17	31.9815	1017.19	8.32667e-17	3.54902	8.32667e-17	6.07552	920.84	2830.54
167751	20.1798	8.32667e-17	1.45761	1.67616	12.5331	463.024	8.32667e-17	8.32667e-17	5.88868	13.6206	708.047	2829.37
164220	27.2632	8.32667e-17	2.88075	1.67616	20.8682	726.197	8.32667e-17	8.32667e-17	10.278	24.1838	872.686	2827.03
124053	107.47	8.32667e-17	1.45761	8.32667e-17	9.75482	645.078	8.32667e-17	8.32667e-17	4.42566	16.6386	816.969	2825.86
163029	62.3964	8.32667e-17	8.32667e-17	8.32667e-17	13.9223	634.6	8.32667e-17	5.2951	1.50011	19.6567	872.349	2825.86
139106	31.389	8.32667e-17	2.88075	4.92996	8.36567	520.152	8.32667e-17	8.32667e-17	1.50011	13.6206	743.461	2824.69
164963	45.1402	8.32667e-17	4.30408	1.67616	20.8682	665.229	8.32667e-17	1.80339	5.88868	19.6567	914.377	2822.35
166995	38.4023	8.32667e-17	5.72753	9.8119	25.0357	897.379	8.32667e-17	8.32667e-17	5.88868	15.1296	827.247	2821.18
167810	31.7098	8.32667e-17	1.45761	8.32667e-17	2.80941	556.581	8.32667e-17	8.32667e-17	1.50011	1.54936	1009.95	2820.01
164484	1800.5	0.0353364	15.6924	6.55721	1.42063	959.693	1.25767	3.54902	2.96278	13.6206	786.855	2815.33
171154	86.3201	8.32667e-17	8.32667e-17	1.67616	16.7007	492.44	8.32667e-17	8.32667e-17	11.7411	16.6386	798.733	2815.33
158076	0.0229174	8.32667e-17	8.32667e-17	1.67616	8.32667e-17	1000.87	8.32667e-17	8.32667e-17	8.32667e-17	8.32667e-17	785.601	2814.16
43034	61.5256	8.32667e-17	2.88075	3.30288	23.6465	609.359	8.32667e-17	1.80339	7.35175	10.6025	862.786	2811.82
163204	229.603	8.32667e-17	2.88075	6.55721	29.2032	654.429	8.32667e-17	5.2951	10.278	27.2018	839.983	2808.31
128091	91.7509	8.32667e-17	8.32667e-17	3.30288	29.2032	813.905	8.32667e-17	8.32667e-17	4.42566	12.1115	901.361	2801.3
128016	58.2944	8.32667e-17	4.30408	8.32667e-17	20.8682	605.034	8.32667e-17	1.80339	11.7411	30.2199	734.376	2797.79
169259	91.0635	8.32667e-17	1.45761	8.32667e-17	11.144	870.774	8.32667e-17	8.32667e-17	1.50011	8.32667e-17	812.304	2797.79
36297	137.213	8.32667e-17	1.45761	1.67616	30.5923	1814.54	8.32667e-17	8.32667e-17	1.50011	13.6206	1443.13	2794.28
22566	98.2358	8.32667e-17	1.45761	4.92996	15.3115	619.789	8.32667e-17	1.80339	1.50011	16.6386	789.839	2793.11
163562	129.606	0.0353364	2.88075	1.67616	27.814	899.244	1.25767	8.32667e-17	11.7411	9.09348	1046.3	2784.92
109463	16.1674	1.22207	8.32667e-17	4.92996	8.36567	540.353	0.0405159	1.80339	5.88868	13.6206	862.489	2783.75
168005	139.711	8.32667e-17	1.45761	1.67616	18.0898	524.296	8.32667e-17	8.32667e-17	5.88868	24.1838	805.644	2781.41
140144	90.4219	8.32667e-17	8.32667e-17	8.32667e-17	12.5331	391.4	8.32667e-17	8.32667e-17	1.50011	3.05786	696.835	2780.24
167403	42.9401	8.32667e-17	1.45761	3.30288	16.7007	742.027	8.32667e-17	8.32667e-17	5.88868	27.2018	833.538	2779.07
95441	72.571	8.32667e-17	1.45761	4.92996	26.4248	823.364	8.32667e-17	8.32667e-17	4.42566	15.1296	968.996	2772.06
162592	32.3745	0.0353364	8.32667e-17	8.32667e-17	6.97653	695.841	1.25767	8.32667e-17	10.278	12.1115	948.291	2770.89
169282	40.9691	0.0353364	8.32667e-17	1.67616	12.5331	847.468	1.25767	8.32667e-17	2.96278	9.09348	1059.68	2765.04
155007	63.9547	8.32667e-17	2.88075	3.30288	22.2573	843.452	8.32667e-17	1.80339	7.35175	21.1657	1044.79	2763.87
167715	52.9091	1.22207	1.45761	8.32667e-17	11.144	739.59	0.0405159	1.80339	7.35175	16.6386	920.05	2760.36
167593	34.529	8.32667e-17	4.30408	3.30288	16.7007	606.747	8.32667e-17	8.32667e-17	1.50011	6.07552	880.349	2759.19
163108	50.7549	8.32667e-17	8.32667e-17	8.32667e-17	23.6465	653.098	8.32667e-17	8.32667e-17	2.96278	18.1477	838.627	2758.02
167533	40.1441	8.32667e-17	8.32667e-17	1.67616	25.0357	771.521	8.32667e-17	1.80339	7.35175	22.6747	947.198	2756.85
121026	28.3634	8.32667e-17	2.88075	4.92996	15.3115	892.292	8.32667e-17	8.32667e-17	2.96278	12.1115	912.406	2754.51
125437	52.932	8.32667e-17	2.88075	6.55721	20.8682	601.38	8.32667e-17	1.80339	8.81486	15.1296	855.994	2754.51
178278	32.4433	8.32667e-17	1.45761	3.30288	9.75482	602.687	8.32667e-17	8.32667e-17	1.50011	9.09348	847.889	2754.51
166237	87.4429	8.32667e-17	2.88075	6.55721	20.8682	703.7	8.32667e-17	8.32667e-17	8.81486	12.1115	902.349	2752.17
168499	132.653	8.32667e-17	1.45761	11.4393	16.7007	788.746	8.32667e-17	8.32667e-17	16.1305	33.2379	931.028	2751
157992	10.0898	8.32667e-17	8.32667e-17	8.32667e-17	4.19837	533.74	8.32667e-17	8.32667e-17	1.50011	1.54936	871.922	2748.66
168424	50.2966	8.32667e-17	2.88075	1.67616	11.144	931.922	8.32667e-17	8.32667e-17	8.32667e-17	1.54936	830.042	2743.98
136730	47.3632	8.32667e-17	1.45761	8.32667e-17	16.7007	639.992	8.32667e-17	8.32667e-17	1.50011	6.07552	907.521	2738.14
169312	53.4361	8.32667e-17	8.32667e-17	4.92996	11.144	597.418	8.32667e-17	8.32667e-17	8.32667e-17	6.07552	864.088	2736.97
104787	190.901	8.32667e-17	1.45761	1.67616	50.0406	1350.2	8.32667e-17	8.32667e-17	16.1305	40.783	1273.24	2733.46
167890	76.0312	8.32667e-17	2.88075	4.92996	26.4248	783.359	8.32667e-17	1.80339	2.96278	24.1838	899.913	2729.95
167166	43.6735	1.22207	4.30408	6.55721	11.144	650.605	0.0405159	8.32667e-17	8.81486	13.6206	904.857	2727.61
163618	10.6174	8.32667e-17	1.45761	1.67616	6.97653	691.739	8.32667e-17	8.32667e-17	4.42566	7.58448	896.899	2727.61
111949	254.075	8.32667e-17	2.88075	8.32667e-17	8.36567	555.505	8.32667e-17	8.32667e-17	1.50011	1.54936	600.444	2725.27
42546	24.8563	8.32667e-17	8.32667e-17	1.67616	8.36567	500.654	8.32667e-17	1.80339	1.50011	6.07552	912.328	2722.93
161916	21.2344	8.32667e-17	8.32667e-17	8.32667e-17	18.0898	516.249	8.32667e-17	1.80339	7.35175	18.1477	771.819	2722.93
163664	31.962	1.22207	1.45761	1.67616	11.144	650.112	0.0405159	1.80339	4.42566	3.05786	721.042	2721.76
163719	73.2813	8.32667e-17	1.45761	8.32667e-17	22.2573	731.645	8.32667e-17	1.80339	8.32667e-17	6.07552	929.487	2720.59
169575	10.4798	8.32667e-17	1.45761	8.32667e-17	6.97653	598.564	8.32667e-17	1.80339	1.50011	3.05786	792.456	2720.59
162259	359.524	8.32667e-17	2.88075	4.92996	36.149	1163.99	8.32667e-17	1.80339	8.32667e-17	12.1115	1210.63	2718.25
163099	40.4191	8.32667e-17	1.45761	3.30288	19.479	704.821	8.32667e-17	8.32667e-17	2.96278	15.1296	821.245	2717.08
181071	96.0131	8.32667e-17	4.30408	1.67616	8.36567	596.151	8.32667e-17	3.54902	2.96278	12.1115	889.769	2715.91
165006	18.5749	8.32667e-17	8.32667e-17	1.67616	8.36567	597.328	8.32667e-17	3.54902	1.50011	12.1115	827.591	2714.74
164895	46.309	8.32667e-17	1.45761	1.67616	9.75482	665.323	8.32667e-17	8.32667e-17	4.42566	21.1657	956.293	2712.4
149259	121.632	8.32667e-17	1.45761	8.32667e-17	11.144	426	8.32667e-17	8.32667e-17	7.35175	21.1657	747.03	2711.23
162432	50.5257	8.32667e-17	8.32667e-17	1.67616	15.3115	625.159	8.32667e-17	1.80339	5.88868	10.6025	812.837	2708.9
168367	70.394	8.32667e-17	8.32667e-17	1.67616	18.0898	598.726	8.32667e-17	1.80339	8.81486	7.58448	855.983	2707.73
153687	76.0083	8.32667e-17	8.32667e-17	4.92996	25.0357	803.344	8.32667e-17	8.32667e-17	4.42566	34.7469	927.017	2699.54
159391	63.8859	8.32667e-17	2.88075	1.67616	27.814	779.599	8.32667e-17	3.54902	13.2042	10.6025	995.905	2696.03
182079	56.2778	0.0353364	1.45761	1.67616	16.7007	659.714	1.25767	8.32667e-17	4.42566	22.6747	830.542	2696.03
156807	38.5856	8.32667e-17	1.45761	6.55721	8.36567	504.271	8.32667e-17	5.2951	7.35175	3.05786	756.897	2693.69
157561	59.7381	8.32667e-17	8.32667e-17	4.92996	25.0357	1062.13	8.32667e-17	8.32667e-17	4.42566	31.7289	1499.99	2693.69
163734	18.2081	8.32667e-17	2.88075	1.67616	6.97653	692.997	8.32667e-17	8.32667e-17	4.42566	4.56662	868.513	2690.18
163267	72.2043	8.32667e-17	2.88075	3.30288	22.2573	779.236	8.32667e-17	1.80339	8.32667e-17	10.6025	845.825	2689.01
165145	72.1356	1.22207	1.45761	1.67616	16.7007	893.447	0.0405159	8.32667e-17	2.96278	19.6567	846.162	2687.84
28074	110.999	8.32667e-17	1.45761	6.55721	22.2573	1141.88	8.32667e-17	8.32667e-17	10.278	15.1296	844.04	2687.84
168856	41.7254	8.32667e-17	8.32667e-17	3.30288	13.9223	651.283	8.32667e-17	3.54902	1.50011	12.1115	672.412	2684.33
106701	55.6132	8.32667e-17	1.45761	1.67616	19.479	723.716	8.32667e-17	8.32667e-17	7.35175	16.6386	945.685	2680.82
165237	56.7132	1.22207	1.45761	3.30288	6.97653	565.45	0.0405159	1.80339	8.32667e-17	13.6206	815.291	2678.48
146439	9.88329	8.32667e-17	1.45761	8.32667e-17	19.479	816.343	8.32667e-17	8.32667e-17	4.42566	33.2379	818.905	2671.47
85461	13.1634	8.32667e-17	2.88075	8.32667e-17	12.5331	638.63	8.32667e-17	8.32667e-17	4.42566	1.54936	892.644	2670.3
115905	41.7025	8.32667e-17	8.32667e-17	8.32667e-17	23.6465	610.797	8.32667e-17	8.32667e-17	5.88868	21.1657	910.109	2665.62
161164	15.8235	8.32667e-17	1.45761	3.30288	20.8682	1064.65	8.32667e-17	1.80339	2.96278	27.2018	787.096	2664.45
169593	38.7002	8.32667e-17	1.45761	8.32667e-17	16.7007	593.427	8.32667e-17	1.80339	1.50011	15.1296	860.016	2663.28
100474	4.21368	8.32667e-17	1.45761	8.32667e-17	25.0357	977.014	8.32667e-17	8.32667e-17	4.42566	16.6386	804.47	2663.28
99139	18.7125	8.32667e-17	2.88075	3.30288	23.6465	586.867	8.32667e-17	8.32667e-17	5.88868	21.1657	892.434	2658.6
166501	41.6567	8.32667e-17	1.45761	8.32667e-17	4.19837	548.04	8.32667e-17	1.80339	1.50011	9.09348	754.399	2655.09
108204	10.6174	8.32667e-17	2.88075	3.30288	13.9223	936.528	8.32667e-17	8.32667e-17	2.96278	13.6206	1088.33	2651.58
167553	60.4485	8.32667e-17	1.45761	4.92996	26.4248	633.101	8.32667e-17	8.32667e-17	1.50011	15.1296	804.759	2650.41
181009	5.52275	8.32667e-17	8.32667e-17	8.32667e-17	2.80941	1048.85	8.32667e-17	8.32667e-17	8.32667e-17	3.05786	838.435	2648.07
164500	35.7666	0.0353364	1.45761	1.67616	27.814	570.614	1.25767	8.32667e-17	2.96278	28.7108	761.255	2646.9
162679	1.22668	0.0353364	8.32667e-17	8.32667e-17	9.75482	1080.84	1.25767	1.80339	1.50011	1.54936	873.659	2638.72
44927	54.9028	8.32667e-17	8.32667e-17	1.67616	18.0898	626.587	8.32667e-17	8.32667e-17	10.278	18.1477	852.041	2638.72
166424	69.4086	8.32667e-17	2.88075	8.32667e-17	11.144	542.937	8.32667e-17	8.32667e-17	1.50011	7.58448	832.762	2636.38
139596	32.3287	8.32667e-17	1.45761	1.67616	2.80941	412.867	8.32667e-17	8.32667e-17	8.32667e-17	7.58448	801.016	2630.53
169054	33.2913	8.32667e-17	8.32667e-17	8.32667e-17	13.9223	687.6	8.32667e-17	1.80339	2.96278	9.09348	834.7	2629.36
171736	40.9004	8.32667e-17	8.32667e-17	3.30288	8.36567	558.955	8.32667e-17	8.32667e-17	7.35175	10.6025	873.387	2628.19
162716	640.905	1.22207	7.15104	4.92996	26.4248	839.383	0.0405159	8.32667e-17	13.2042	25.6928	1005.56	2624.68
85211	273.208	8.32667e-17	11.4217	1.67616	38.9273	815.15	8.32667e-17	3.54902	5.88868	31.7289	868.918	2623.51
165985	33.8185	8.32667e-17	2.88075	3.30288	12.5331	493.583	8.32667e-17	8.32667e-17	2.96278	6.07552	728.469	2623.51
168830	51.8549	1.22207	1.45761	8.32667e-17	16.7007	625.17	0.0405159	8.32667e-17	10.278	22.6747	816.891	2621.17
91357	97.7317	8.32667e-17	5.72753	1.67616	23.6465	701.163	8.32667e-17	1.80339	13.2042	10.6025	953.719	2614.15
166841	11.7872	8.32667e-17	1.45761	3.30288	22.2573	571.956	8.32667e-17	8.32667e-17	1.50011	31.7289	766.666	2614.15
163763	82.1496	8.32667e-17	8.32667e-17	1.67616	12.5331	755.237	8.32667e-17	8.32667e-17	1.50011	13.6206	809.252	2610.65
164285	10.0898	8.32667e-17	1.45761	3.30288	8.36567	599.581	8.32667e-17	1.80339	2.96278	7.58448	687.068	2609.48
166166	5.91308	8.32667e-17	8.32667e-17	1.67616	18.0898	785.933	8.32667e-17	8.32667e-17	2.96278	12.1115	867.475	2609.48
134552	5.89012	8.32667e-17	8.32667e-17	1.67616	12.5331	409.871	8.32667e-17	8.32667e-17	1.50011	6.07552	665.875	2609.48
175346	58.9819	8.32667e-17	1.45761	8.32667e-17	20.8682	521.672	8.32667e-17	8.32667e-17	8.81486	10.6025	817.796	2608.31
166285	78.6435	1.22207	8.32667e-17	8.32667e-17	18.0898	647.648	0.0405159	1.80339	1.50011	18.1477	785.894	2605.97
164961	84.991	0.0353364	4.30408	1.67616	19.479	787.528	1.25767	1.80339	2.96278	19.6567	978.35	2600.12
163665	45.5069	8.32667e-17	4.30408	4.92996	12.5331	723.774	8.32667e-17	8.32667e-17	8.81486	6.07552	971.377	2598.95
47076	62.8547	8.32667e-17	1.45761	1.67616	26.4248	515.055	8.32667e-17	8.32667e-17	7.35175	15.1296	824.523	2597.78
124514	47.4548	8.32667e-17	2.88075	3.30288	13.9223	576.041	8.32667e-17	8.32667e-17	2.96278	10.6025	805.876	2591.93
169000	19.8818	8.32667e-17	8.32667e-17	8.32667e-17	2.80941	526.292	8.32667e-17	8.32667e-17	2.96278	8.32667e-17	590.861	2591.93
155297	62.3506	8.32667e-17	1.45761	3.30288	30.5923	612.157	8.32667e-17	8.32667e-17	10.278	19.6567	924.987	2589.59
19142	3.43254	8.32667e-17	8.32667e-17	8.32667e-17	4.19837	866.785	8.32667e-17	8.32667e-17	8.32667e-17	3.05786	810.942	2588.42
145734	76.4437	8.32667e-17	4.30408	17.9489	65.3213	877.295	8.32667e-17	10.5341	21.9831	54.364	771.773	2587.25
165676	33.7726	8.32667e-17	4.30408	3.30288	12.5331	711.711	8.32667e-17	1.80339	5.88868	10.6025	921.306	2584.91
168835	24.4437	8.32667e-17	8.32667e-17	8.32667e-17	4.19837	603.613	8.32667e-17	8.32667e-17	1.50011	4.56662	703.296	2584.91
156570	68.9045	8.32667e-17	2.88075	1.67616	22.2573	703.6	8.32667e-17	8.32667e-17	5.88868	7.58448	861.792	2582.57
87091	0.587941	8.32667e-17	8.32667e-17	8.32667e-17	13.9223	980.749	8.32667e-17	8.32667e-17	2.96278	8.32667e-17	1291.38	2582.57
20512	85.4493	8.32667e-17	1.45761	1.67616	19.479	605.03	8.32667e-17	1.80339	2.96278	9.09348	733.025	2580.24
33706	0.0344779	8.32667e-17	8.32667e-17	8.32667e-17	4.19837	456.438	8.32667e-17	8.32667e-17	8.32667e-17	1.54936	724.225	2577.9
148418	57.2632	8.32667e-17	8.32667e-17	3.30288	15.3115	502.707	8.32667e-17	8.32667e-17	5.88868	10.6025	674.476	2575.56
160143	62.8547	8.32667e-17	1.45761	8.32667e-17	6.97653	543.815	8.32667e-17	8.32667e-17	8.32667e-17	4.56662	671.968	2574.39
97994	73.3043	8.32667e-17	2.88075	8.32667e-17	11.144	489.807	8.32667e-17	8.32667e-17	1.50011	7.58448	806.83	2573.22
167415	15.663	8.32667e-17	1.45761	1.67616	12.5331	581.447	8.32667e-17	8.32667e-17	4.42566	22.6747	845.096	2573.22
144852	43.6505	8.32667e-17	8.32667e-17	4.92996	19.479	567.956	8.32667e-17	8.32667e-17	5.88868	13.6206	759.893	2572.05
170499	0.49811	8.32667e-17	8.32667e-17	8.32667e-17	2.80941	424.2	8.32667e-17	8.32667e-17	8.32667e-17	1.54936	587.635	2572.05
165537	87.145	8.32667e-17	1.45761	1.67616	8.36567	515.245	8.32667e-17	8.32667e-17	2.96278	12.1115	909.693	2569.71
87224	82.9745	8.32667e-17	1.45761	8.18453	13.9223	718.393	8.32667e-17	8.32667e-17	7.35175	24.1838	940.258	2563.86
158659	40.3962	2.41648	8.32667e-17	6.55721	16.7007	665.02	0.0795823	8.32667e-17	5.88868	24.1838	829.21	2562.69
32385	30.1513	8.32667e-17	8.32667e-17	6.55721	9.75482	606.329	8.32667e-17	8.32667e-17	7.35175	3.05786	723.572	2562.69
168708	30.8847	8.32667e-17	1.45761	8.18453	12.5331	648.91	8.32667e-17	1.80339	2.96278	7.58448	762.926	2560.35
163898	45.5985	8.32667e-17	8.32667e-17	1.67616	20.8682	683.764	8.32667e-17	8.32667e-17	1.50011	16.6386	892.814	2559.18
100202	60.6777	8.32667e-17	2.88075	1.67616	11.144	598.497	8.32667e-17	8.32667e-17	4.42566	10.6025	768.13	2558.01
43889	54.6278	1.22207	1.45761	1.67616	8.36567	554.364	0.0405159	1.80339	2.96278	3.05786	653.106	2555.67
177434	19.8818	8.32667e-17	1.45761	8.32667e-17	1.42063	462.739	8.32667e-17	8.32667e-17	8.32667e-17	3.05786	616.2	2553.33
168304	95.7152	8.32667e-17	2.88075	8.32667e-17	15.3115	730.364	8.32667e-17	8.32667e-17	4.42566	22.6747	949.765	2552.16
47279	90.8573	8.32667e-17	2.88075	1.67616	25.0357	562.653	8.32667e-17	8.32667e-17	4.42566	16.6386	761.221	2552.16
22019	17.0846	1.22207	8.32667e-17	1.67616	22.2573	904.174	0.0405159	8.32667e-17	5.88868	16.6386	884.045	2549.82
125313	49.7924	8.32667e-17	2.88075	1.67616	11.144	700.969	8.32667e-17	8.32667e-17	5.88868	9.09348	871.246	2548.65
165599	40.8087	8.32667e-17	2.88075	1.67616	18.0898	620.066	8.32667e-17	8.32667e-17	4.42566	15.1296	900.682	2547.49
169223	39.2274	8.32667e-17	1.45761	4.92996	19.479	911.905	8.32667e-17	3.54902	1.50011	19.6567	797.547	2545.15
164823	80.408	8.32667e-17	8.32667e-17	3.30288	19.479	812.434	8.32667e-17	1.80339	13.2042	16.6386	845.928	2542.81
165862	41.1296	8.32667e-17	8.32667e-17	8.32667e-17	22.2573	759.091	8.32667e-17	1.80339	7.35175	27.2018	764.664	2539.3
89281	6.96904	8.32667e-17	1.45761	8.32667e-17	6.97653	853.43	8.32667e-17	8.32667e-17	2.96278	4.56662	785.222	2538.13
109885	42.8943	0.0353364	2.88075	1.67616	20.8682	509.592	1.25767	8.32667e-17	10.278	30.2199	762.328	2534.62
114933	17.91	8.32667e-17	8.32667e-17	3.30288	6.97653	610.386	8.32667e-17	8.32667e-17	5.88868	6.07552	749.261	2532.28
167380	48.1424	8.32667e-17	8.32667e-17	8.32667e-17	8.36567	473.711	8.32667e-17	8.32667e-17	1.50011	10.6025	736.476	2531.11
164984	75.4812	0.0694155	4.30408	11.4393	68.0996	1182	2.4828	1.80339	20.5199	90.5798	938.779	2525.26
159994	22.1055	8.32667e-17	4.30408	8.18453	27.814	793.098	8.32667e-17	8.32667e-17	1.50011	3.05786	612.097	2524.09
163217	46.9736	1.22207	2.88075	3.30288	11.144	669.18	0.0405159	8.32667e-17	7.35175	10.6025	900.872	2524.09
171519	92.53	0.0353364	8.32667e-17	1.67616	20.8682	618.451	1.25767	1.80339	4.42566	10.6025	785.78	2522.92
168786	43.2609	8.32667e-17	8.32667e-17	1.67616	26.4248	601.105	8.32667e-17	8.32667e-17	2.96278	12.1115	751.925	2519.41
181627	34.6207	8.32667e-17	1.45761	8.32667e-17	11.144	550.569	8.32667e-17	8.32667e-17	8.32667e-17	10.6025	711.174	2514.74
30757	56.782	8.32667e-17	8.32667e-17	1.67616	30.5923	643.835	8.32667e-17	1.80339	2.96278	18.1477	849.405	2510.06
165824	39.4565	8.32667e-17	8.32667e-17	8.32667e-17	8.36567	637.079	8.32667e-17	8.32667e-17	14.6674	9.09348	803.423	2510.06
46822	16.7178	8.32667e-17	1.45761	4.92996	11.144	538.411	8.32667e-17	8.32667e-17	2.96278	19.6567	642.23	2508.89
162312	22.5869	8.32667e-17	8.32667e-17	1.67616	11.144	653.067	8.32667e-17	8.32667e-17	2.96278	6.07552	826.461	2507.72
106865	75.1146	8.32667e-17	2.88075	4.92996	18.0898	526.959	8.32667e-17	8.32667e-17	4.42566	6.07552	809.711	2501.87
169392	0.475788	1.22207	1.45761	8.32667e-17	4.19837	348.323	0.0405159	8.32667e-17	8.32667e-17	8.32667e-17	491.34	2501.87
93140	24.0082	8.32667e-17	8.32667e-17	3.30288	20.8682	590.435	8.32667e-17	8.32667e-17	8.32667e-17	12.1115	732.964	2501.87
162712	58.7069	8.32667e-17	2.88075	8.32667e-17	9.75482	495.107	8.32667e-17	3.54902	2.96278	13.6206	804.152	2500.7
122843	1.75481	8.32667e-17	8.32667e-17	8.32667e-17	2.80941	800.336	8.32667e-17	8.32667e-17	8.32667e-17	3.05786	793.175	2500.7
23575	48.0507	8.32667e-17	1.45761	1.67616	19.479	651.603	8.32667e-17	1.80339	8.81486	7.58448	776.45	2498.36
41331	20.0193	0.0353364	1.45761	8.32667e-17	16.7007	543.862	1.25767	3.54902	10.278	21.1657	686.827	2497.19
159029	65.1463	8.32667e-17	1.45761	6.55721	43.0948	746.126	8.32667e-17	8.32667e-17	7.35175	25.6928	878.161	2496.02
165255	22.9995	0.0353364	1.45761	1.67616	12.5331	544.433	1.25767	8.32667e-17	7.35175	13.6206	907.122	2494.85
167985	8.09361	8.32667e-17	1.45761	8.32667e-17	2.80941	448.332	8.32667e-17	8.32667e-17	1.50011	6.07552	671.495	2492.51
89567	74.3813	8.32667e-17	1.45761	8.32667e-17	11.144	615.538	8.32667e-17	8.32667e-17	2.96278	12.1115	697.94	2487.83
162606	27.4695	8.32667e-17	1.45761	3.30288	9.75482	466.797	8.32667e-17	8.32667e-17	1.50011	18.1477	640.529	2485.49
122101	11.6955	8.32667e-17	8.32667e-17	3.30288	13.9223	455.094	8.32667e-17	8.32667e-17	4.42566	15.1296	717.462	2484.32
169434	28.0884	0.0353364	8.32667e-17	8.32667e-17	12.5331	526.063	1.25767	8.32667e-17	1.50011	6.07552	532.815	2480.82
163237	57.5382	8.32667e-17	8.32667e-17	6.55721	11.144	647.733	8.32667e-17	8.32667e-17	4.42566	6.07552	816.98	2478.48
163259	22.4264	8.32667e-17	4.30408	1.67616	9.75482	652.766	8.32667e-17	1.80339	8.81486	9.09348	721.052	2477.31
129612	5.7294	8.32667e-17	8.32667e-17	4.92996	6.97653	477.748	8.32667e-17	3.54902	8.32667e-17	4.56662	758.116	2477.31
167187	0.121574	8.32667e-17	4.30408	8.32667e-17	8.32667e-17	315.7	8.32667e-17	8.32667e-17	8.32667e-17	8.32667e-17	635.548	2476.14
164192	84.3952	1.29127	2.88075	3.30288	27.814	947.843	1.33789	1.80339	5.88868	28.7108	823.323	2476.14
165472	38.0585	8.32667e-17	1.45761	6.55721	15.3115	502.848	8.32667e-17	8.32667e-17	4.42566	24.1838	721.759	2476.14
143983	54.582	0.0353364	1.45761	1.67616	16.7007	749.778	1.25767	8.32667e-17	1.50011	9.09348	757.877	2472.63
137906	40.7858	8.32667e-17	1.45761	3.30288	9.75482	561.145	8.32667e-17	8.32667e-17	1.50011	19.6567	699.063	2472.63
27275	22.0138	8.32667e-17	8.32667e-17	8.32667e-17	2.80941	530.568	8.32667e-17	8.32667e-17	2.96278	8.32667e-17	677.311	2471.46
114329	8.62139	8.32667e-17	8.32667e-17	8.32667e-17	2.80941	667.65	8.32667e-17	8.32667e-17	8.32667e-17	4.56662	819.758	2470.29
162046	57.7215	8.32667e-17	8.32667e-17	4.92996	27.814	684.747	8.32667e-17	8.32667e-17	4.42566	22.6747	763.059	2465.61
129796	16.0987	1.22207	1.45761	1.67616	22.2573	539.98	0.0405159	8.32667e-17	2.96278	30.2199	719.232	2464.44
102512	37.9898	0.0353364	2.88075	8.32667e-17	26.4248	1650.06	1.25767	1.80339	8.32667e-17	21.1657	1725.81	2463.27
123763	33.4518	0.0353364	1.45761	1.67616	19.479	678.133	1.25767	8.32667e-17	4.42566	15.1296	771.143	2462.1
169256	117.209	8.32667e-17	8.32667e-17	3.30288	16.7007	859.029	8.32667e-17	1.80339	8.81486	22.6747	889.327	2457.42
163798	69.1107	1.22207	1.45761	1.67616	13.9223	590.662	0.0405159	8.32667e-17	1.50011	9.09348	815.399	2456.25
169073	54.1695	8.32667e-17	8.32667e-17	8.32667e-17	6.97653	515.891	8.32667e-17	8.32667e-17	10.278	7.58448	650.228	2453.91
120782	10.1356	8.32667e-17	8.32667e-17	8.32667e-17	16.7007	782.945	8.32667e-17	8.32667e-17	8.32667e-17	1.54936	749.874	2452.74
168401	4.97164	8.32667e-17	8.32667e-17	3.30288	11.144	917.154	8.32667e-17	8.32667e-17	8.32667e-17	15.1296	775.934	2450.41
169314	9.33267	8.32667e-17	1.45761	8.32667e-17	16.7007	853.713	8.32667e-17	8.32667e-17	2.96278	15.1296	887.96	2449.24
117364	10.7092	8.32667e-17	8.32667e-17	8.32667e-17	13.9223	619.782	8.32667e-17	8.32667e-17	2.96278	9.09348	787.136	2446.9
167315	48.807	8.32667e-17	2.88075	3.30288	13.9223	765.664	8.32667e-17	8.32667e-17	7.35175	9.09348	743.063	2443.39
164445	52.2903	8.32667e-17	1.45761	3.30288	13.9223	768.897	8.32667e-17	8.32667e-17	5.88868	12.1115	960.711	2443.39
162584	33.681	8.32667e-17	1.45761	8.32667e-17	9.75482	518.807	8.32667e-17	8.32667e-17	1.50011	9.09348	736.698	2442.22
168102	59.3486	8.32667e-17	8.32667e-17	8.32667e-17	18.0898	575.955	8.32667e-17	1.80339	5.88868	16.6386	773.44	2442.22
115571	23.0683	8.32667e-17	8.32667e-17	8.32667e-17	18.0898	643.468	8.32667e-17	8.32667e-17	8.32667e-17	19.6567	718.315	2442.22
164779	56.0257	8.32667e-17	2.88075	6.55721	23.6465	623.763	8.32667e-17	8.32667e-17	7.35175	19.6567	787.152	2438.71
97970	0.453532	1.22207	1.45761	8.32667e-17	1.42063	638.101	0.0405159	8.32667e-17	8.32667e-17	8.32667e-17	699.38	2437.54
149644	12.6129	0.0353364	8.32667e-17	8.32667e-17	1.42063	380.875	1.25767	8.32667e-17	8.32667e-17	8.32667e-17	727.847	2437.54
166909	34.1623	1.22207	8.32667e-17	1.67616	15.3115	675.502	0.0405159	1.80339	8.32667e-17	21.1657	779.242	2436.37
168924	7.08381	8.32667e-17	8.32667e-17	1.67616	18.0898	445.845	8.32667e-17	1.80339	8.32667e-17	1.54936	729.573	2436.37
136956	70.3711	8.32667e-17	8.32667e-17	8.32667e-17	6.97653	517.499	8.32667e-17	8.32667e-17	5.88868	10.6025	743.448	2432.86
30282	81.1413	8.32667e-17	8.32667e-17	1.67616	9.75482	581.221	8.32667e-17	8.32667e-17	1.50011	9.09348	758.598	2431.69
122526	29.349	8.32667e-17	8.32667e-17	8.32667e-17	8.36567	740.76	8.32667e-17	8.32667e-17	4.42566	4.56662	856.513	2430.52
163861	396.14	2.41648	1.45761	6.55721	69.4887	1215.74	0.0795823	1.80339	32.225	60.4	1168.8	2425.84
144481	76.3978	8.32667e-17	1.45761	3.30288	9.75482	550.605	8.32667e-17	1.80339	5.88868	9.09348	723.334	2425.84
34074	0.0114568	8.32667e-17	8.32667e-17	8.32667e-17	8.32667e-17	236.34	8.32667e-17	8.32667e-17	8.32667e-17	1.54936	688.971	2423.5
110716	50.2966	8.32667e-17	1.45761	4.92996	29.2032	771.155	8.32667e-17	8.32667e-17	1.50011	18.1477	803.897	2422.33
103193	36.7063	8.32667e-17	8.32667e-17	3.30288	2.80941	607.688	8.32667e-17	8.32667e-17	2.96278	6.07552	734.387	2418.83
88249	19.2857	8.32667e-17	2.88075	8.32667e-17	20.8682	932.162	8.32667e-17	8.32667e-17	4.42566	31.7289	920.626	2417.66
169214	19.2857	8.32667e-17	8.32667e-17	8.32667e-17	5.58742	672.691	8.32667e-17	8.32667e-17	4.42566	6.07552	726.531	2412.98
168787	172.616	8.32667e-17	4.30408	3.30288	27.814	522.531	8.32667e-17	8.32667e-17	8.32667e-17	7.58448	652.961	2404.79
176237	125.779	8.32667e-17	2.88075	1.67616	12.5331	499.076	8.32667e-17	8.32667e-17	8.32667e-17	6.07552	800.117	2403.62
163271	70.944	8.32667e-17	2.88075	3.30288	11.144	817.571	8.32667e-17	1.80339	8.32667e-17	3.05786	783.767	2400.11
169760	27.5841	8.32667e-17	1.45761	3.30288	20.8682	771.233	8.32667e-17	1.80339	2.96278	27.2018	832.282	2400.11
164714	59.9444	8.32667e-17	8.32667e-17	4.92996	9.75482	484.314	8.32667e-17	8.32667e-17	1.50011	16.6386	733.827	2400.11
166116	14.5164	8.32667e-17	8.32667e-17	1.67616	12.5331	514.367	8.32667e-17	1.80339	5.88868	12.1115	593.506	2398.94
172283	3.17977	8.32667e-17	8.32667e-17	8.32667e-17	12.5331	869.51	8.32667e-17	8.32667e-17	1.50011	3.05786	835.281	2397.77
165456	41.9546	8.32667e-17	1.45761	8.32667e-17	8.36567	667.696	8.32667e-17	8.32667e-17	4.42566	10.6025	837.33	2395.43
110629	27.4695	8.32667e-17	1.45761	4.92996	8.36567	511.939	8.32667e-17	8.32667e-17	2.96278	6.07552	658.313	2395.43
168219	52.1528	8.32667e-17	2.88075	4.92996	18.0898	526.647	8.32667e-17	8.32667e-17	8.32667e-17	10.6025	696.204	2393.09
125177	9.30973	8.32667e-17	8.32667e-17	1.67616	18.0898	655.344	8.32667e-17	8.32667e-17	8.32667e-17	6.07552	696.743	2393.09
94354	12.8194	8.32667e-17	8.32667e-17	8.32667e-17	8.36567	519.755	8.32667e-17	8.32667e-17	2.96278	6.07552	616.485	2393.09
26576	48.4174	8.32667e-17	1.45761	1.67616	23.6465	613.396	8.32667e-17	3.54902	5.88868	22.6747	885.784	2387.24
97178	44.911	8.32667e-17	1.45761	8.32667e-17	8.36567	570.629	8.32667e-17	8.32667e-17	2.96278	10.6025	766.661	2387.24
154215	96.4714	8.32667e-17	1.45761	1.67616	27.814	1056.17	8.32667e-17	3.54902	1.50011	22.6747	1118.39	2383.74
165494	55.8882	8.32667e-17	1.45761	8.32667e-17	19.479	558.781	8.32667e-17	8.32667e-17	2.96278	9.09348	801.746	2377.89
162897	42.2984	8.32667e-17	1.45761	8.32667e-17	19.479	562.694	8.32667e-17	8.32667e-17	7.35175	9.09348	776.086	2376.72
117141	53.8486	8.32667e-17	1.45761	3.30288	9.75482	590.365	8.32667e-17	3.54902	2.96278	10.6025	709.996	2374.38
41007	22.0138	0.0353364	1.45761	8.32667e-17	9.75482	625.619	1.25767	8.32667e-17	8.32667e-17	24.1838	1015.64	2372.04
144667	10.4798	8.32667e-17	1.45761	8.32667e-17	8.36567	501.281	8.32667e-17	8.32667e-17	1.50011	4.56662	643.405	2372.04
166971	40.8775	8.32667e-17	8.32667e-17	8.32667e-17	12.5331	565.078	8.32667e-17	3.54902	1.50011	13.6206	684.22	2372.04
21720	3.66231	1.22207	4.30408	8.32667e-17	8.36567	514.543	0.0405159	8.32667e-17	8.32667e-17	3.05786	643.469	2370.87
168288	56.8507	8.32667e-17	1.45761	1.67616	22.2573	457.576	8.32667e-17	8.32667e-17	1.50011	6.07552	659.388	2368.53
116319	31.2973	8.32667e-17	1.45761	6.55721	19.479	661.931	8.32667e-17	8.32667e-17	4.42566	24.1838	681.908	2367.36
167527	35.3999	8.32667e-17	1.45761	1.67616	9.75482	739.501	8.32667e-17	8.32667e-17	5.88868	9.09348	883.546	2363.85
123734	14.2183	8.32667e-17	2.88075	8.32667e-17	11.144	500.108	8.32667e-17	8.32667e-17	1.50011	16.6386	692.024	2360.34
182633	2.05357	8.32667e-17	8.32667e-17	8.32667e-17	4.19837	432.478	8.32667e-17	8.32667e-17	2.96278	7.58448	690.319	2360.34
164122	385.463	8.32667e-17	1.45761	3.30288	27.814	691.635	8.32667e-17	8.32667e-17	17.5937	30.2199	854.99	2359.17
167809	1.27256	8.32667e-17	1.45761	8.32667e-17	34.7598	1381.25	8.32667e-17	8.32667e-17	1.50011	13.6206	886.387	2355.66
168992	15.3878	8.32667e-17	2.88075	3.30288	13.9223	788.273	8.32667e-17	1.80339	2.96278	10.6025	755.296	2354.5
166495	35.4916	8.32667e-17	1.45761	8.32667e-17	11.144	667.675	8.32667e-17	8.32667e-17	8.32667e-17	19.6567	829.22	2353.33
21609	11.5808	8.32667e-17	1.45761	8.32667e-17	6.97653	575.593	8.32667e-17	8.32667e-17	2.96278	10.6025	654.549	2350.99
185084	11.145	8.32667e-17	8.32667e-17	8.32667e-17	9.75482	331.76	8.32667e-17	8.32667e-17	1.50011	8.32667e-17	697.803	2349.82
173051	23.4809	8.32667e-17	1.45761	6.55721	52.8189	828.638	8.32667e-17	5.2951	10.278	61.909	952.785	2348.65
164809	22.3806	8.32667e-17	1.45761	1.67616	25.0357	722.922	8.32667e-17	1.80339	8.32667e-17	16.6386	663.209	2348.65
166572	47.3173	8.32667e-17	1.45761	1.67616	11.144	512.504	8.32667e-17	8.32667e-17	2.96278	10.6025	869.12	2347.48
176041	90.7885	8.32667e-17	1.45761	1.67616	23.6465	708.89	8.32667e-17	8.32667e-17	2.96278	15.1296	853.7	2341.63
144165	27.9279	0.0353364	1.45761	8.32667e-17	11.144	612.943	1.25767	8.32667e-17	2.96278	16.6386	716.844	2339.29
88326	24.7646	8.32667e-17	8.32667e-17	1.67616	4.19837	611.587	8.32667e-17	8.32667e-17	1.50011	6.07552	707.381	2339.29
51392	2.76609	8.32667e-17	8.32667e-17	8.32667e-17	4.19837	648.587	8.32667e-17	8.32667e-17	8.32667e-17	3.05786	660.245	2339.29
160148	51.6945	8.32667e-17	8.32667e-17	8.32667e-17	12.5331	472.333	8.32667e-17	1.80339	5.88868	6.07552	717.553	2338.12
164891	25.7962	8.32667e-17	1.45761	4.92996	6.97653	627.633	8.32667e-17	8.32667e-17	2.96278	15.1296	747.979	2332.27
166459	94.5236	8.32667e-17	1.45761	1.67616	13.9223	691.209	8.32667e-17	8.32667e-17	4.42566	15.1296	706.331	2331.1
133912	2.46729	8.32667e-17	8.32667e-17	8.32667e-17	4.19837	580.872	8.32667e-17	8.32667e-17	8.32667e-17	1.54936	646.468	2331.1
98988	12.6359	8.32667e-17	8.32667e-17	8.32667e-17	4.19837	410.993	8.32667e-17	8.32667e-17	1.50011	8.32667e-17	601.059	2331.1
39748	45.4381	8.32667e-17	8.32667e-17	1.67616	11.144	562.596	8.32667e-17	8.32667e-17	2.96278	9.09348	740.952	2324.08
39698	10.6633	8.32667e-17	8.32667e-17	8.32667e-17	16.7007	711.146	8.32667e-17	8.32667e-17	8.32667e-17	9.09348	714.507	2321.75
122818	49.4945	8.32667e-17	8.32667e-17	8.32667e-17	5.58742	615.778	8.32667e-17	8.32667e-17	1.50011	6.07552	779.012	2319.41
97119	6.18857	8.32667e-17	8.32667e-17	8.32667e-17	5.58742	554.337	8.32667e-17	8.32667e-17	8.32667e-17	1.54936	645.003	2319.41
162761	8.34603	8.32667e-17	8.32667e-17	8.32667e-17	8.36567	559.801	8.32667e-17	8.32667e-17	8.32667e-17	7.58448	693.653	2318.24
165282	5459.75	8.32667e-17	69.7875	13.0667	598.752	1950.34	8.32667e-17	3.54902	45.3931	919.008	1535.34	2315.9
164937	39.8003	8.32667e-17	8.32667e-17	1.67616	12.5331	451.116	8.32667e-17	8.32667e-17	2.96278	7.58448	717.441	2315.9
86770	33.6122	8.32667e-17	1.45761	1.67616	16.7007	567.799	8.32667e-17	8.32667e-17	1.50011	7.58448	705.846	2314.73
93013	44.5672	8.32667e-17	8.32667e-17	8.18453	36.149	708.66	8.32667e-17	8.32667e-17	1.50011	16.6386	769.901	2314.73
21573	1.66291	8.32667e-17	8.32667e-17	1.67616	20.8682	556.228	8.32667e-17	8.32667e-17	1.50011	3.05786	842.284	2312.39
163315	44.9339	8.32667e-17	2.88075	1.67616	11.144	559.684	8.32667e-17	1.80339	2.96278	13.6206	657.182	2311.22
85397	19.7442	8.32667e-17	1.45761	3.30288	6.97653	398.226	8.32667e-17	8.32667e-17	7.35175	15.1296	776.602	2311.22
159760	78.8269	1.22207	1.45761	6.55721	33.3707	639.674	0.0405159	8.32667e-17	14.6674	39.2739	781.809	2310.05
165969	28.776	8.32667e-17	1.45761	8.32667e-17	9.75482	428.355	8.32667e-17	8.32667e-17	2.96278	7.58448	641.67	2308.88
172761	20.0193	8.32667e-17	8.32667e-17	4.92996	12.5331	774.581	8.32667e-17	8.32667e-17	11.7411	9.09348	1144.67	2308.88
43752	30.7243	8.32667e-17	8.32667e-17	3.30288	15.3115	534.902	8.32667e-17	1.80339	10.278	22.6747	802.99	2306.54
129108	85.0139	8.32667e-17	4.30408	8.32667e-17	8.36567	467.084	8.32667e-17	1.80339	4.42566	19.6567	737.793	2301.86
41397	52.4049	8.32667e-17	8.32667e-17	4.92996	5.58742	481.558	8.32667e-17	8.32667e-17	4.42566	9.09348	697.335	2300.69
121499	48.8299	8.32667e-17	2.88075	1.67616	20.8682	983.992	8.32667e-17	8.32667e-17	1.50011	4.56662	928.872	2299.52
167210	34.7811	8.32667e-17	8.32667e-17	1.67616	11.144	640.593	8.32667e-17	8.32667e-17	5.88868	10.6025	650.759	2298.35
163440	64.9172	8.32667e-17	8.32667e-17	8.32667e-17	16.7007	619.896	8.32667e-17	8.32667e-17	11.7411	25.6928	830.387	2297.18
167906	0.139471	8.32667e-17	1.45761	8.32667e-17	2.80941	592.968	8.32667e-17	8.32667e-17	8.32667e-17	1.54936	693.795	2292.5
169095	60.586	8.32667e-17	8.32667e-17	1.67616	12.5331	607.635	8.32667e-17	8.32667e-17	4.42566	10.6025	716.822	2292.5
169220	50.2507	8.32667e-17	8.32667e-17	8.32667e-17	26.4248	577.098	8.32667e-17	1.80339	4.42566	18.1477	709.94	2292.5
173410	212.646	8.32667e-17	7.15104	8.32667e-17	38.9273	664.769	8.32667e-17	8.32667e-17	20.5199	52.855	740.014	2289
167670	0.860451	8.32667e-17	8.32667e-17	8.32667e-17	2.80941	499.06	8.32667e-17	8.32667e-17	8.32667e-17	4.56662	793.359	2289
168160	41.5192	8.32667e-17	8.32667e-17	1.67616	22.2573	561.269	8.32667e-17	8.32667e-17	13.2042	25.6928	740.946	2289
118524	49.4715	8.32667e-17	2.88075	1.67616	8.36567	542.44	8.32667e-17	8.32667e-17	1.50011	12.1115	657.105	2287.83
165674	16.3509	8.32667e-17	8.32667e-17	8.32667e-17	6.97653	546.493	8.32667e-17	8.32667e-17	4.42566	19.6567	680.085	2287.83
123995	13.8514	8.32667e-17	2.88075	8.32667e-17	16.7007	572.981	8.32667e-17	8.32667e-17	4.42566	6.07552	666.694	2284.32
94841	15.5942	8.32667e-17	8.32667e-17	8.32667e-17	6.97653	505.446	8.32667e-17	8.32667e-17	4.42566	10.6025	702.858	2279.64
168783	49.907	8.32667e-17	2.88075	3.30288	23.6465	602.581	8.32667e-17	1.80339	7.35175	19.6567	805.987	2278.47
164277	39.5711	8.32667e-17	1.45761	1.67616	9.75482	554.747	8.32667e-17	8.32667e-17	2.96278	13.6206	781.456	2277.3
172111	17.0617	8.32667e-17	1.45761	3.30288	4.19837	506.554	8.32667e-17	8.32667e-17	2.96278	6.07552	633.977	2274.96
169503	64.5505	8.32667e-17	2.88075	4.92996	12.5331	577.347	8.32667e-17	8.32667e-17	2.96278	7.58448	797.772	2273.79
165576	75.2292	8.32667e-17	2.88075	1.67616	12.5331	644.841	8.32667e-17	8.32667e-17	2.96278	16.6386	733.182	2273.79
184796	66.7046	1.22207	5.72753	3.30288	9.75482	469.611	0.0405159	8.32667e-17	1.50011	4.56662	693.221	2269.11
20609	3.04188	8.32667e-17	8.32667e-17	8.32667e-17	15.3115	509.758	8.32667e-17	1.80339	4.42566	6.07552	828.553	2269.11
166504	6.96904	8.32667e-17	8.32667e-17	8.32667e-17	8.36567	740.984	8.32667e-17	8.32667e-17	7.35175	13.6206	948.449	2267.94
163810	41.5421	0.0353364	8.32667e-17	8.32667e-17	5.58742	493.238	1.25767	8.32667e-17	2.96278	16.6386	617.707	2267.94
167627	36.5688	8.32667e-17	4.30408	1.67616	5.58742	384.702	8.32667e-17	8.32667e-17	7.35175	7.58448	671.127	2265.6
170543	28.6614	8.32667e-17	1.45761	1.67616	11.144	513.371	8.32667e-17	8.32667e-17	1.50011	18.1477	692.089	2265.6
159823	12.6129	0.0353364	1.45761	8.32667e-17	1.42063	617.829	1.25767	1.80339	2.96278	12.1115	593.951	2265.6
30001	42.1609	8.32667e-17	8.32667e-17	8.32667e-17	9.75482	456.514	8.32667e-17	8.32667e-17	2.96278	3.05786	752.601	2265.6
172505	12.6359	1.22207	8.32667e-17	8.32667e-17	9.75482	625.992	0.0405159	1.80339	1.50011	19.6567	649.352	2262.09
153483	57.2174	8.32667e-17	1.45761	6.55721	16.7007	573.271	8.32667e-17	8.32667e-17	8.32667e-17	10.6025	762.618	2260.92
163914	76.3291	1.22207	2.88075	1.67616	34.7598	710.299	0.0405159	8.32667e-17	10.278	21.1657	886.149	2258.58
114927	16.2133	8.32667e-17	1.45761	8.32667e-17	13.9223	558.981	8.32667e-17	1.80339	8.32667e-17	1.54936	480.331	2257.42
167669	42.5963	8.32667e-17	1.45761	1.67616	19.479	820	8.32667e-17	8.32667e-17	2.96278	27.2018	710.798	2256.25
163693	3.57041	8.32667e-17	8.32667e-17	8.32667e-17	8.36567	735.246	8.32667e-17	8.32667e-17	2.96278	37.7649	782.154	2255.08
168012	78.529	8.32667e-17	8.32667e-17	8.32667e-17	23.6465	479.447	8.32667e-17	8.32667e-17	4.42566	22.6747	484.016	2255.08
165846	44.8881	8.32667e-17	4.30408	3.30288	9.75482	477.519	8.32667e-17	8.32667e-17	8.81486	15.1296	677.052	2253.91
109590	25.6586	8.32667e-17	8.32667e-17	8.32667e-17	6.97653	519.662	8.32667e-17	8.32667e-17	1.50011	4.56662	590.83	2253.91
20213	74.725	8.32667e-17	1.45761	1.67616	20.8682	589.12	8.32667e-17	8.32667e-17	2.96278	9.09348	737.012	2252.74
39754	28.478	8.32667e-17	8.32667e-17	1.67616	18.0898	764.277	8.32667e-17	8.32667e-17	4.42566	22.6747	724.141	2251.57
165577	19.2627	8.32667e-17	1.45761	8.32667e-17	6.97653	473.52	8.32667e-17	1.80339	5.88868	9.09348	670.277	2250.4
171955	18.552	1.22207	8.32667e-17	1.67616	16.7007	466.5	0.0405159	8.32667e-17	1.50011	1.54936	556.818	2250.4
36765	64.5734	8.32667e-17	8.32667e-17	8.32667e-17	16.7007	549.629	8.32667e-17	3.54902	1.50011	7.58448	857.124	2249.23
116088	80.0643	8.32667e-17	8.32667e-17	8.32667e-17	2.80941	494.463	8.32667e-17	1.80339	2.96278	8.32667e-17	589.359	2249.23
163680	52.9549	8.32667e-17	4.30408	3.30288	12.5331	517.375	8.32667e-17	1.80339	1.50011	10.6025	700.213	2246.89
136299	47.4778	8.32667e-17	8.32667e-17	8.32667e-17	12.5331	433.72	8.32667e-17	1.80339	2.96278	10.6025	661.959	2246.89
174912	9.60798	8.32667e-17	1.45761	8.32667e-17	2.80941	353.994	8.32667e-17	8.32667e-17	8.32667e-17	3.05786	593.95	2245.72
140818	25.2689	8.32667e-17	8.32667e-17	4.92996	9.75482	586.309	8.32667e-17	8.32667e-17	2.96278	13.6206	685.662	2244.55
166856	12.934	8.32667e-17	8.32667e-17	8.32667e-17	2.80941	573.142	8.32667e-17	8.32667e-17	1.50011	9.09348	718.029	2242.21
36531	31.2514	8.32667e-17	2.88075	8.32667e-17	13.9223	521.109	8.32667e-17	8.32667e-17	4.42566	18.1477	624.594	2241.04
176361	39.7774	8.32667e-17	8.32667e-17	3.30288	5.58742	615.563	8.32667e-17	8.32667e-17	1.50011	19.6567	706.046	2241.04
173504	4.60417	8.32667e-17	8.32667e-17	1.67616	4.19837	701.006	8.32667e-17	8.32667e-17	8.32667e-17	8.32667e-17	886.116	2239.87
35606	72.7772	8.32667e-17	4.30408	3.30288	31.9815	695.259	8.32667e-17	1.80339	7.35175	28.7108	727.963	2238.7
116754	19.4462	0.0353364	8.32667e-17	3.30288	11.144	469.611	1.25767	1.80339	4.42566	27.2018	693.221	2237.53
117232	61.2735	8.32667e-17	2.88075	8.32667e-17	8.36567	604.592	8.32667e-17	8.32667e-17	7.35175	3.05786	602.001	2234.02
176948	32.237	8.32667e-17	8.32667e-17	8.32667e-17	8.36567	502.736	8.32667e-17	8.32667e-17	1.50011	4.56662	683.932	2234.02
168311	32.6496	8.32667e-17	8.32667e-17	8.32667e-17	15.3115	564.035	8.32667e-17	8.32667e-17	5.88868	10.6025	781.497	2232.85
148258	104.446	8.32667e-17	2.88075	3.30288	6.97653	456.16	8.32667e-17	1.80339	7.35175	15.1296	631.019	2231.68
30114	23.8019	8.32667e-17	1.45761	1.67616	2.80941	650.44	8.32667e-17	8.32667e-17	8.32667e-17	8.32667e-17	837.265	2231.68
32161	0.701088	0.0353364	8.32667e-17	8.32667e-17	15.3115	818.721	1.25767	8.32667e-17	8.32667e-17	10.6025	725.658	2230.51
91993	28.7531	8.32667e-17	1.45761	3.30288	13.9223	539.809	8.32667e-17	8.32667e-17	2.96278	19.6567	663.846	2229.34
139614	7.31332	8.32667e-17	8.32667e-17	1.67616	2.80941	436.203	8.32667e-17	8.32667e-17	2.96278	8.32667e-17	609.305	2227
47694	73.923	0.0353364	1.45761	3.30288	13.9223	590.49	1.25767	8.32667e-17	8.32667e-17	16.6386	751.881	2225.83
168991	14.1495	8.32667e-17	1.45761	8.32667e-17	2.80941	456.186	8.32667e-17	8.32667e-17	8.32667e-17	4.56662	639.122	2225.83
102843	27.5153	8.32667e-17	4.30408	1.67616	15.3115	751.55	8.32667e-17	1.80339	1.50011	6.07552	924.146	2223.5
173390	27.4466	1.22207	8.32667e-17	1.67616	13.9223	634.272	0.0405159	8.32667e-17	4.42566	9.09348	749.356	2223.5
154093	83.9598	8.32667e-17	1.45761	4.92996	9.75482	590.443	8.32667e-17	8.32667e-17	8.32667e-17	9.09348	735.667	2221.16
165748	91.1781	8.32667e-17	8.32667e-17	3.30288	15.3115	513.531	8.32667e-17	8.32667e-17	14.6674	24.1838	747.483	2221.16
164211	52.0611	8.32667e-17	1.45761	8.32667e-17	15.3115	508.272	8.32667e-17	8.32667e-17	2.96278	9.09348	765.024	2219.99
166911	41.9317	8.32667e-17	8.32667e-17	1.67616	25.0357	574.398	8.32667e-17	8.32667e-17	1.50011	9.09348	695.067	2219.99
135267	82.1496	8.32667e-17	8.32667e-17	8.32667e-17	4.19837	463.895	8.32667e-17	1.80339	1.50011	4.56662	568.953	2219.99
24405	57.6299	8.32667e-17	5.72753	8.32667e-17	11.144	607.692	8.32667e-17	8.32667e-17	1.50011	10.6025	735.738	2218.82
167228	126.1	0.0353364	4.30408	8.32667e-17	31.9815	629.749	1.25767	8.32667e-17	8.32667e-17	27.2018	588.596	2218.82
166774	57.4007	8.32667e-17	1.45761	1.67616	22.2573	627.589	8.32667e-17	1.80339	14.6674	24.1838	733.115	2218.82
114861	36.4313	8.32667e-17	8.32667e-17	4.92996	20.8682	673.866	8.32667e-17	8.32667e-17	1.50011	21.1657	679.249	2216.48
167648	85.1514	8.32667e-17	1.45761	9.8119	16.7007	519.974	8.32667e-17	8.32667e-17	1.50011	12.1115	682.664	2214.14
155089	39.9149	8.32667e-17	2.88075	1.67616	12.5331	511.764	8.32667e-17	1.80339	17.5937	13.6206	606.995	2211.8
108542	63.1755	8.32667e-17	2.88075	8.32667e-17	16.7007	672.789	8.32667e-17	8.32667e-17	2.96278	15.1296	758.961	2209.46
163223	14.2183	8.32667e-17	2.88075	1.67616	8.36567	588.647	8.32667e-17	8.32667e-17	8.32667e-17	12.1115	595.184	2207.12
175651	336.038	8.32667e-17	4.30408	1.67616	25.0357	596.778	8.32667e-17	8.32667e-17	2.96278	7.58448	642.482	2205.95
181417	57.584	8.32667e-17	7.15104	1.67616	6.97653	499.982	8.32667e-17	8.32667e-17	8.32667e-17	7.58448	651.502	2204.78
45434	78.6894	8.32667e-17	2.88075	8.32667e-17	6.97653	658.665	8.32667e-17	8.32667e-17	4.42566	12.1115	946.802	2204.78
167453	15.2502	8.32667e-17	1.45761	8.32667e-17	30.5923	859.759	8.32667e-17	8.32667e-17	1.50011	15.1296	686.587	2202.44
177551	1.24962	0.0353364	1.45761	1.67616	11.144	1018.31	1.25767	1.80339	8.32667e-17	8.32667e-17	842.421	2200.1
168763	48.6236	8.32667e-17	1.45761	1.67616	22.2573	716.266	8.32667e-17	8.32667e-17	8.32667e-17	19.6567	657.783	2200.1
118025	40.8087	8.32667e-17	1.45761	1.67616	8.36567	400.142	8.32667e-17	8.32667e-17	8.32667e-17	15.1296	532.152	2200.1
90341	22.9078	0.0353364	4.30408	1.67616	6.97653	681.789	1.25767	8.32667e-17	8.32667e-17	19.6567	667.12	2198.93
137998	25.2919	8.32667e-17	8.32667e-17	8.32667e-17	16.7007	683.375	8.32667e-17	8.32667e-17	1.50011	10.6025	748.189	2197.76
163502	42.0463	8.32667e-17	1.45761	8.32667e-17	20.8682	666.042	8.32667e-17	1.80339	1.50011	4.56662	722.453	2196.59
25278	8.32667e-17	8.32667e-17	8.32667e-17	8.32667e-17	8.32667e-17	290.65	8.32667e-17	8.32667e-17	8.32667e-17	1.54936	683.998	2195.42
156902	40.0066	8.32667e-17	8.32667e-17	4.92996	12.5331	515.882	8.32667e-17	1.80339	8.81486	18.1477	647.527	2194.25
155178	2.94996	8.32667e-17	1.45761	1.67616	1.42063	450.737	8.32667e-17	8.32667e-17	1.50011	8.32667e-17	595.883	2188.41
161554	26.0942	8.32667e-17	1.45761	8.32667e-17	45.8731	1335.5	8.32667e-17	8.32667e-17	8.32667e-17	6.07552	696.999	2186.07
111300	46.0569	8.32667e-17	2.88075	8.32667e-17	19.479	705.656	8.32667e-17	1.80339	2.96278	12.1115	660.449	2184.9
146813	25.4753	0.0353364	8.32667e-17	1.67616	18.0898	710.765	1.25767	1.80339	2.96278	13.6206	605.088	2182.56
92344	45.0485	8.32667e-17	1.45761	1.67616	11.144	377.797	8.32667e-17	1.80339	1.50011	3.05786	580.605	2180.22
165904	50.4799	8.32667e-17	8.32667e-17	3.30288	12.5331	464.214	8.32667e-17	1.80339	8.32667e-17	3.05786	662.125	2180.22
125381	40.9691	8.32667e-17	2.88075	8.32667e-17	12.5331	514.639	8.32667e-17	1.80339	4.42566	9.09348	673.183	2177.88
179125	27.6987	8.32667e-17	8.32667e-17	1.67616	9.75482	498.465	8.32667e-17	8.32667e-17	8.32667e-17	7.58448	596.129	2177.88
156654	36.0646	8.32667e-17	8.32667e-17	1.67616	9.75482	557.444	8.32667e-17	8.32667e-17	7.35175	13.6206	797.686	2176.71
169155	64.4818	8.32667e-17	2.88075	1.67616	47.2623	941.447	8.32667e-17	8.32667e-17	11.7411	52.855	915.242	2173.2
163876	43.5818	8.32667e-17	1.45761	1.67616	30.5923	610.26	8.32667e-17	1.80339	10.278	21.1657	707.376	2173.2
114074	38.6086	8.32667e-17	8.32667e-17	8.32667e-17	4.19837	259.646	8.32667e-17	8.32667e-17	2.96278	6.07552	492.003	2173.2
136984	23.3892	1.22207	8.32667e-17	1.67616	23.6465	481.129	0.0405159	8.32667e-17	2.96278	19.6567	569.042	2170.86
164745	44.2006	1.22207	2.88075	8.32667e-17	11.144	517.391	0.0405159	8.32667e-17	1.50011	7.58448	705.617	2166.18
169657	54.1466	1.22207	1.45761	3.30288	16.7007	1075.17	0.0405159	8.32667e-17	2.96278	7.58448	1334.91	2166.18
167205	23.1371	8.32667e-17	8.32667e-17	1.67616	5.58742	707.983	8.32667e-17	8.32667e-17	8.32667e-17	4.56662	572.669	2165.01
172986	66.2463	8.32667e-17	4.30408	6.55721	15.3115	646.217	8.32667e-17	1.80339	7.35175	19.6567	749.402	2163.84
164314	29.1198	8.32667e-17	1.45761	1.67616	12.5331	442.916	8.32667e-17	8.32667e-17	1.50011	27.2018	634.999	2163.84
93809	67.2775	8.32667e-17	1.45761	3.30288	15.3115	542.73	8.32667e-17	8.32667e-17	2.96278	18.1477	753.024	2162.67
122517	66.4296	1.22207	8.32667e-17	8.32667e-17	5.58742	622.285	0.0405159	1.80339	8.32667e-17	1.54936	734.446	2162.67
95955	3.98396	8.32667e-17	8.32667e-17	3.30288	19.479	242.941	8.32667e-17	1.80339	11.7411	7.58448	316.66	2162.67
121332	14.0807	0.0353364	1.45761	1.67616	1.42063	477.523	1.25767	8.32667e-17	8.32667e-17	4.56662	678.403	2161.5
167500	53.9861	8.32667e-17	8.32667e-17	1.67616	8.36567	443.069	8.32667e-17	8.32667e-17	2.96278	7.58448	684.974	2161.5
158824	19.9276	8.32667e-17	8.32667e-17	3.30288	4.19837	466.752	8.32667e-17	8.32667e-17	2.96278	15.1296	627.024	2156.83
159253	30.0596	8.32667e-17	8.32667e-17	1.67616	8.36567	487.989	8.32667e-17	8.32667e-17	8.32667e-17	12.1115	633.885	2154.49
118108	62.9235	8.32667e-17	1.45761	1.67616	12.5331	368.733	8.32667e-17	8.32667e-17	4.42566	3.05786	648.064	2150.98
168242	18.0935	8.32667e-17	8.32667e-17	8.32667e-17	19.479	806.558	8.32667e-17	8.32667e-17	1.50011	4.56662	662.118	2150.98
119377	67.7587	0.0694155	8.32667e-17	8.32667e-17	23.6465	470.656	2.4828	8.32667e-17	2.96278	10.6025	605.44	2149.81
24252	57.9965	8.32667e-17	8.32667e-17	3.30288	16.7007	532.186	8.32667e-17	1.80339	4.42566	12.1115	778.651	2148.64
45428	63.8401	8.32667e-17	4.30408	1.67616	26.4248	676.539	8.32667e-17	8.32667e-17	1.50011	24.1838	684.663	2147.47
162093	23.4122	0.0353364	8.32667e-17	1.67616	6.97653	580.923	1.25767	1.80339	8.32667e-17	6.07552	661.325	2147.47
145519	116.888	8.32667e-17	8.32667e-17	3.30288	15.3115	515.918	8.32667e-17	8.32667e-17	1.50011	6.07552	658.332	2147.47
41928	30.4263	8.32667e-17	1.45761	8.32667e-17	13.9223	517.469	8.32667e-17	8.32667e-17	4.42566	12.1115	732.638	2146.3
168273	54.9028	8.32667e-17	8.32667e-17	8.32667e-17	11.144	560.125	8.32667e-17	8.32667e-17	2.96278	7.58448	808.51	2145.13
169129	61.686	8.32667e-17	8.32667e-17	8.32667e-17	4.19837	429.331	8.32667e-17	8.32667e-17	1.50011	3.05786	541.77	2145.13
168307	37.8064	8.32667e-17	1.45761	1.67616	25.0357	530.529	8.32667e-17	8.32667e-17	4.42566	18.1477	665.154	2141.62
95212	0.0229174	8.32667e-17	8.32667e-17	8.32667e-17	8.32667e-17	225.6	8.32667e-17	8.32667e-17	8.32667e-17	8.32667e-17	619.963	2141.62
24287	29.8074	8.32667e-17	8.32667e-17	4.92996	18.0898	470.761	8.32667e-17	8.32667e-17	8.32667e-17	12.1115	636.498	2140.45
165745	24.7876	8.32667e-17	2.88075	8.32667e-17	2.80941	550.205	8.32667e-17	8.32667e-17	8.32667e-17	6.07552	601.771	2138.11
119406	34.9415	8.32667e-17	1.45761	1.67616	8.36567	422.903	8.32667e-17	8.32667e-17	2.96278	6.07552	595.728	2136.94
137356	80.6372	8.32667e-17	4.30408	3.30288	13.9223	578.305	8.32667e-17	8.32667e-17	8.32667e-17	16.6386	672.12	2134.6
145735	24.5583	8.32667e-17	8.32667e-17	8.32667e-17	5.58742	456.621	8.32667e-17	8.32667e-17	8.32667e-17	3.05786	795.848	2134.6
160511	50.1132	8.32667e-17	1.45761	3.30288	12.5331	553.47	8.32667e-17	8.32667e-17	1.50011	13.6206	800.371	2132.26
155370	266.219	8.32667e-17	8.32667e-17	1.67616	5.58742	542.176	8.32667e-17	8.32667e-17	2.96278	4.56662	582.833	2131.09
91286	65.0776	8.32667e-17	2.88075	4.92996	25.0357	745.741	8.32667e-17	8.32667e-17	8.81486	19.6567	740.296	2129.92
162450	42.5047	1.22207	1.45761	8.32667e-17	23.6465	555.593	0.0405159	1.80339	1.50011	15.1296	624.751	2129.92
167605	156.667	8.32667e-17	4.30408	8.32667e-17	22.2573	602.34	8.32667e-17	8.32667e-17	8.32667e-17	4.56662	720.854	2125.25
168996	32.4662	8.32667e-17	1.45761	8.32667e-17	12.5331	457.356	8.32667e-17	8.32667e-17	1.50011	8.32667e-17	593.218	2125.25
163527	45.2777	8.32667e-17	8.32667e-17	1.67616	5.58742	519.59	8.32667e-17	8.32667e-17	1.50011	10.6025	571.929	2124.08
159890	57.0799	0.0353364	8.32667e-17	8.32667e-17	8.36567	494.886	1.25767	8.32667e-17	5.88868	3.05786	720.369	2122.91
166162	56.8965	8.32667e-17	1.45761	3.30288	6.97653	526.437	8.32667e-17	1.80339	8.32667e-17	10.6025	631.371	2120.57
35339	37.0272	0.0353364	1.45761	8.32667e-17	8.36567	373.889	1.25767	8.32667e-17	1.50011	7.58448	600.831	2120.57
180898	32.1682	8.32667e-17	8.32667e-17	1.67616	12.5331	482.848	8.32667e-17	8.32667e-17	1.50011	13.6206	685.184	2120.57
105924	47.8673	8.32667e-17	8.32667e-17	3.30288	6.97653	515.837	8.32667e-17	8.32667e-17	4.42566	6.07552	634.022	2120.57
33097	19.4003	8.32667e-17	8.32667e-17	8.32667e-17	15.3115	507.862	8.32667e-17	8.32667e-17	8.81486	18.1477	628.582	2119.4
162105	13.8285	1.22207	8.32667e-17	1.67616	12.5331	405.763	0.0405159	8.32667e-17	4.42566	4.56662	622.633	2119.4
20051	12.0854	0.0353364	1.45761	8.32667e-17	1.42063	553.147	1.25767	8.32667e-17	2.96278	1.54936	686.869	2118.23
154831	47.959	1.22207	1.45761	8.32667e-17	23.6465	590.576	0.0405159	8.32667e-17	4.42566	30.2199	782.962	2117.06
183445	15.7088	8.32667e-17	8.32667e-17	1.67616	6.97653	622.232	8.32667e-17	8.32667e-17	5.88868	7.58448	716.881	2115.89
126424	0.279302	8.32667e-17	2.88075	1.67616	8.32667e-17	369.158	8.32667e-17	7.04137	8.32667e-17	8.32667e-17	415.965	2114.72
117584	13.0028	8.32667e-17	1.45761	8.32667e-17	9.75482	375.279	8.32667e-17	8.32667e-17	4.42566	12.1115	621.095	2114.72
169301	65.5588	8.32667e-17	1.45761	1.67616	11.144	607.325	8.32667e-17	8.32667e-17	1.50011	18.1477	623.618	2113.55
32821	53.3674	8.32667e-17	2.88075	8.32667e-17	15.3115	524.066	8.32667e-17	8.32667e-17	7.35175	10.6025	720.51	2112.38
120130	45.0256	8.32667e-17	2.88075	4.92996	16.7007	429.651	8.32667e-17	8.32667e-17	1.50011	10.6025	632.224	2108.87
162888	43.0547	8.32667e-17	1.45761	8.32667e-17	6.97653	465.736	8.32667e-17	1.80339	1.50011	9.09348	729.679	2108.87
173820	36.7521	8.32667e-17	8.32667e-17	1.67616	15.3115	654.127	8.32667e-17	8.32667e-17	7.35175	13.6206	731.867	2108.87
123785	44.7277	8.32667e-17	2.88075	8.32667e-17	18.0898	489.26	8.32667e-17	8.32667e-17	8.32667e-17	9.09348	617.687	2107.7
30115	11.2367	8.32667e-17	8.32667e-17	1.67616	2.80941	542.622	8.32667e-17	8.32667e-17	1.50011	1.54936	715.191	2107.7
162616	40.0753	8.32667e-17	8.32667e-17	3.30288	8.36567	513.274	8.32667e-17	8.32667e-17	1.50011	4.56662	661.021	2105.36
107606	16.0987	8.32667e-17	1.45761	8.32667e-17	11.144	652.824	8.32667e-17	8.32667e-17	5.88868	12.1115	739.969	2103.02
43433	12.1542	8.32667e-17	8.32667e-17	8.32667e-17	20.8682	711.254	8.32667e-17	1.80339	8.32667e-17	3.05786	749.639	2103.02
172626	40.4649	8.32667e-17	8.32667e-17	3.30288	8.36567	466.959	8.32667e-17	8.32667e-17	8.32667e-17	12.1115	693.207	2103.02
44925	24.0311	8.32667e-17	8.32667e-17	8.32667e-17	6.97653	360.798	8.32667e-17	8.32667e-17	4.42566	3.05786	653.416	2103.02
17942	62.0298	8.32667e-17	8.32667e-17	1.67616	15.3115	456.142	8.32667e-17	1.80339	2.96278	12.1115	625.618	2101.85
28391	38.494	8.32667e-17	2.88075	1.67616	12.5331	512.101	8.32667e-17	3.54902	1.50011	4.56662	710.996	2100.68
166883	64.3901	8.32667e-17	8.32667e-17	4.92996	4.19837	527.731	8.32667e-17	8.32667e-17	8.32667e-17	3.05786	621.924	2099.51
164859	20.9363	8.32667e-17	2.88075	9.8119	15.3115	518.346	8.32667e-17	8.32667e-17	4.42566	19.6567	593.524	2098.34
167336	15.0439	8.32667e-17	8.32667e-17	3.30288	12.5331	611.752	8.32667e-17	8.32667e-17	10.278	9.09348	762.779	2097.17
110156	33.8414	8.32667e-17	8.32667e-17	1.67616	8.36567	644.857	8.32667e-17	8.32667e-17	1.50011	21.1657	738.587	2096.01
181204	68.767	8.32667e-17	8.32667e-17	4.92996	20.8682	472.092	8.32667e-17	8.32667e-17	8.81486	13.6206	637.856	2096.01
132181	39.1128	8.32667e-17	1.45761	8.32667e-17	5.58742	391.226	8.32667e-17	8.32667e-17	7.35175	10.6025	636.049	2093.67
163092	35.079	8.32667e-17	8.32667e-17	1.67616	13.9223	406.137	8.32667e-17	8.32667e-17	1.50011	4.56662	757.727	2093.67
41495	45.0944	8.32667e-17	8.32667e-17	4.92996	5.58742	541.246	8.32667e-17	5.2951	8.81486	16.6386	698.973	2091.33
175982	100.802	8.32667e-17	8.32667e-17	3.30288	20.8682	539.667	8.32667e-17	8.32667e-17	5.88868	28.7108	621.979	2088.99
163910	66.2004	8.32667e-17	1.45761	3.30288	9.75482	529.207	8.32667e-17	8.32667e-17	2.96278	9.09348	666.498	2087.82
167464	20.9822	8.32667e-17	1.45761	8.32667e-17	4.19837	539.45	8.32667e-17	1.80339	1.50011	12.1115	563.921	2086.65
163080	56.8278	8.32667e-17	8.32667e-17	3.30288	18.0898	514.762	8.32667e-17	8.32667e-17	1.50011	9.09348	713.71	2080.8
123258	34.0706	8.32667e-17	8.32667e-17	1.67616	9.75482	572.713	8.32667e-17	8.32667e-17	4.42566	4.56662	591.067	2080.8
46736	30.7013	0.0353364	8.32667e-17	8.32667e-17	4.19837	505.2	1.25767	8.32667e-17	1.50011	10.6025	625.868	2077.29
164008	20.4778	8.32667e-17	1.45761	1.67616	8.36567	452.226	8.32667e-17	1.80339	1.50011	6.07552	644.503	2076.12
84840	7.72643	0.0353364	8.32667e-17	8.32667e-17	18.0898	978.133	1.25767	8.32667e-17	1.50011	9.09348	735.536	2072.61
172742	43.4443	8.32667e-17	2.88075	1.67616	2.80941	420.576	8.32667e-17	1.80339	1.50011	6.07552	701.06	2071.44
165963	26.2775	8.32667e-17	8.32667e-17	1.67616	15.3115	465.399	8.32667e-17	8.32667e-17	2.96278	12.1115	618.915	2070.27
166793	512.038	8.32667e-17	1.45761	1.67616	9.75482	261.252	8.32667e-17	1.80339	2.96278	18.1477	581.104	2069.1
177105	31.9849	8.32667e-17	8.32667e-17	8.32667e-17	11.144	513.105	8.32667e-17	8.32667e-17	8.32667e-17	1.54936	611.052	2069.1
136390	57.2861	2.41648	4.30408	4.92996	22.2573	571.667	0.0795823	8.32667e-17	2.96278	10.6025	670.741	2066.76
169457	24.2833	8.32667e-17	1.45761	1.67616	12.5331	496.407	8.32667e-17	1.80339	8.81486	10.6025	793.346	2062.09
86838	24.2374	8.32667e-17	8.32667e-17	3.30288	12.5331	422.662	8.32667e-17	8.32667e-17	1.50011	10.6025	530.935	2062.09
40466	16.4197	0.0353364	8.32667e-17	1.67616	13.9223	478.523	1.25767	8.32667e-17	8.32667e-17	18.1477	581.178	2060.92
164788	29.349	0.0353364	1.45761	1.67616	18.0898	419.912	1.25767	1.80339	2.96278	21.1657	506.631	2059.75
167532	37.2105	8.32667e-17	8.32667e-17	3.30288	16.7007	427.252	8.32667e-17	8.32667e-17	8.81486	13.6206	718.661	2058.58
154878	36.9813	0.0353364	2.88075	1.67616	11.144	356.54	1.25767	8.32667e-17	1.50011	4.56662	562.917	2057.41
168084	25.544	8.32667e-17	8.32667e-17	3.30288	8.36567	522.864	8.32667e-17	8.32667e-17	8.32667e-17	3.05786	765.094	2053.9
163042	27.1027	8.32667e-17	8.32667e-17	8.32667e-17	1.42063	668.549	8.32667e-17	8.32667e-17	8.32667e-17	12.1115	676.528	2053.9
169673	97.1588	8.32667e-17	2.88075	1.67616	15.3115	548.227	8.32667e-17	1.80339	5.88868	13.6206	826.028	2051.56
167833	22.5411	1.22207	4.30408	6.55721	69.4887	659.516	0.0405159	3.54902	13.2042	69.454	758.912	2048.05
167714	44.6589	8.32667e-17	8.32667e-17	8.32667e-17	4.19837	367.099	8.32667e-17	8.32667e-17	8.32667e-17	3.05786	552.188	2045.71
166682	26.2546	8.32667e-17	1.45761	8.32667e-17	12.5331	610.046	8.32667e-17	8.32667e-17	2.96278	7.58448	642.536	2044.54
141760	31.2973	8.32667e-17	8.32667e-17	1.67616	9.75482	388.443	8.32667e-17	8.32667e-17	1.50011	6.07552	594.172	2044.54
40104	21.2573	8.32667e-17	8.32667e-17	1.67616	1.42063	216.112	8.32667e-17	8.32667e-17	2.96278	6.07552	532.091	2044.54
173669	20.2944	8.32667e-17	1.45761	1.67616	16.7007	474.838	8.32667e-17	8.32667e-17	14.6674	15.1296	667.583	2042.2
111615	17.612	0.0353364	1.45761	8.32667e-17	18.0898	538.341	1.25767	8.32667e-17	2.96278	12.1115	621.973	2042.2
163019	12.2918	8.32667e-17	8.32667e-17	8.32667e-17	1.42063	440.311	8.32667e-17	8.32667e-17	1.50011	4.56662	649.84	2042.2
17984	0.769281	8.32667e-17	8.32667e-17	8.32667e-17	5.58742	570.345	8.32667e-17	1.80339	8.32667e-17	8.32667e-17	672.086	2041.03
19638	29.6012	8.32667e-17	8.32667e-17	8.32667e-17	8.36567	338.131	8.32667e-17	8.32667e-17	8.32667e-17	3.05786	604.644	2041.03
162702	47.8903	8.32667e-17	1.45761	8.32667e-17	19.479	417.587	8.32667e-17	8.32667e-17	7.35175	12.1115	591.647	2039.86
143799	72.2043	8.32667e-17	1.45761	8.32667e-17	16.7007	606.032	8.32667e-17	8.32667e-17	2.96278	10.6025	633.066	2038.69
166174	21.3719	1.22207	8.32667e-17	1.67616	11.144	527.745	0.0405159	8.32667e-17	1.50011	7.58448	625.975	2038.69
166012	37.1647	8.32667e-17	8.32667e-17	8.32667e-17	9.75482	530.589	8.32667e-17	8.32667e-17	1.50011	13.6206	684.065	2037.52
142775	22.5411	8.32667e-17	8.32667e-17	8.32667e-17	19.479	513.133	8.32667e-17	1.80339	5.88868	9.09348	619.154	2037.52
163386	38.0356	0.0353364	8.32667e-17	4.92996	15.3115	477.322	1.25767	8.32667e-17	2.96278	10.6025	616.276	2037.52
162968	57.0799	8.32667e-17	1.45761	8.32667e-17	11.144	618.002	8.32667e-17	8.32667e-17	8.32667e-17	6.07552	641.217	2036.35
155883	10.8009	8.32667e-17	1.45761	3.30288	20.8682	600.662	8.32667e-17	8.32667e-17	1.50011	9.09348	615.488	2035.18
137474	9.33267	8.32667e-17	8.32667e-17	8.32667e-17	6.97653	459.781	8.32667e-17	8.32667e-17	4.42566	3.05786	533.839	2034.01
167999	75.3666	8.32667e-17	2.88075	8.18453	5.58742	391.302	8.32667e-17	8.32667e-17	5.88868	18.1477	661.712	2032.84
166689	63.0381	8.32667e-17	8.32667e-17	3.30288	12.5331	530.43	8.32667e-17	8.32667e-17	5.88868	13.6206	635.441	2032.84
116667	35.8354	8.32667e-17	8.32667e-17	4.92996	13.9223	561.953	8.32667e-17	3.54902	2.96278	10.6025	553.22	2031.68
26969	48.2111	8.32667e-17	1.45761	3.30288	12.5331	525.477	8.32667e-17	8.32667e-17	4.42566	13.6206	750.242	2030.51
168635	13.0258	8.32667e-17	1.45761	8.18453	11.144	560.765	8.32667e-17	8.32667e-17	8.32667e-17	7.58448	588.316	2029.34
169338	51.4424	8.32667e-17	1.45761	3.30288	11.144	534.597	8.32667e-17	8.32667e-17	1.50011	6.07552	693.539	2028.17
34697	0.678401	8.32667e-17	8.32667e-17	1.67616	20.8682	1050.36	8.32667e-17	8.32667e-17	8.32667e-17	10.6025	904.691	2027
123816	101.673	1.22207	8.32667e-17	3.30288	11.144	455.996	0.0405159	8.32667e-17	13.2042	21.1657	583.761	2027
162422	36.0417	8.32667e-17	1.45761	1.67616	8.36567	541.086	8.32667e-17	3.54902	8.32667e-17	6.07552	648.995	2024.66
148414	73.373	8.32667e-17	1.45761	4.92996	9.75482	555.621	8.32667e-17	1.80339	1.50011	4.56662	632.854	2024.66
159896	28.2259	8.32667e-17	4.30408	8.32667e-17	9.75482	556.891	8.32667e-17	8.32667e-17	1.50011	6.07552	616.654	2021.15
30049	13.9202	8.32667e-17	8.32667e-17	8.32667e-17	27.814	765.579	8.32667e-17	8.32667e-17	1.50011	1.54936	716.038	2019.98
162324	25.2689	8.32667e-17	8.32667e-17	8.32667e-17	2.80941	473.143	8.32667e-17	8.32667e-17	8.32667e-17	8.32667e-17	560.902	2018.81
168461	11.1221	8.32667e-17	1.45761	1.67616	2.80941	483.851	8.32667e-17	8.32667e-17	8.32667e-17	7.58448	587.956	2017.64
161384	35.3999	1.22207	8.32667e-17	8.32667e-17	19.479	741.816	0.0405159	8.32667e-17	5.88868	16.6386	759.202	2012.96
176752	35.5145	8.32667e-17	2.88075	1.67616	15.3115	838.631	8.32667e-17	8.32667e-17	2.96278	15.1296	723.013	2009.45
167277	53.8486	8.32667e-17	1.45761	8.32667e-17	6.97653	452.156	8.32667e-17	8.32667e-17	4.42566	7.58448	622.895	2007.11
162688	25.9108	8.32667e-17	1.45761	1.67616	6.97653	474.604	8.32667e-17	1.80339	2.96278	6.07552	597.359	2005.94
23786	46.9965	8.32667e-17	4.30408	8.32667e-17	11.144	387.086	8.32667e-17	8.32667e-17	2.96278	6.07552	584.713	2004.77
116251	20.5466	8.32667e-17	1.45761	1.67616	6.97653	464.569	8.32667e-17	8.32667e-17	2.96278	16.6386	791.834	2004.77
162434	66.9567	8.32667e-17	1.45761	8.32667e-17	5.58742	556.985	8.32667e-17	8.32667e-17	5.88868	10.6025	643.664	2002.43
166048	57.3319	8.32667e-17	8.32667e-17	8.32667e-17	8.36567	425.501	8.32667e-17	1.80339	8.81486	4.56662	580.892	2002.43
21862	63.8401	8.32667e-17	1.45761	1.67616	19.479	383.263	8.32667e-17	8.32667e-17	4.42566	18.1477	631.949	2001.26
164338	38.3794	8.32667e-17	1.45761	8.32667e-17	13.9223	503.818	8.32667e-17	8.32667e-17	2.96278	10.6025	609.657	2001.26
165700	344.997	8.32667e-17	4.30408	6.55721	20.8682	529.585	8.32667e-17	3.54902	19.0568	39.2739	798.911	1997.76
162915	38.0356	8.32667e-17	2.88075	3.30288	12.5331	608.983	8.32667e-17	8.32667e-17	2.96278	15.1296	723.583	1995.42
18577	78.2769	0.0353364	1.45761	8.32667e-17	16.7007	590.083	1.25767	8.32667e-17	8.32667e-17	19.6567	624.898	1995.42
44923	29.3719	8.32667e-17	1.45761	1.67616	18.0898	465.29	8.32667e-17	8.32667e-17	7.35175	12.1115	587.86	1994.25
86997	27.7445	8.32667e-17	8.32667e-17	8.32667e-17	15.3115	543.603	8.32667e-17	3.54902	1.50011	7.58448	609.843	1994.25
158037	118.332	8.32667e-17	4.30408	1.67616	12.5331	480.175	8.32667e-17	8.32667e-17	7.35175	10.6025	678.416	1991.91
175159	19.0105	8.32667e-17	8.32667e-17	1.67616	13.9223	471.953	8.32667e-17	8.32667e-17	7.35175	22.6747	597.345	1991.91
35656	37.7835	8.32667e-17	8.32667e-17	3.30288	6.97653	473.128	8.32667e-17	8.32667e-17	1.50011	10.6025	556.853	1991.91
148176	1.77779	8.32667e-17	8.32667e-17	8.32667e-17	5.58742	525.916	8.32667e-17	1.80339	1.50011	6.07552	499.078	1990.74
34093	46.9736	8.32667e-17	8.32667e-17	8.32667e-17	18.0898	494.932	8.32667e-17	1.80339	11.7411	10.6025	736.583	1988.4
162615	32.0307	8.32667e-17	1.45761	3.30288	8.36567	508.058	8.32667e-17	8.32667e-17	4.42566	16.6386	689.361	1987.23
165630	11.3744	8.32667e-17	1.45761	1.67616	9.75482	486.385	8.32667e-17	8.32667e-17	1.50011	9.09348	556.92	1987.23
144696	23.6414	8.32667e-17	8.32667e-17	8.32667e-17	19.479	416.11	8.32667e-17	1.80339	4.42566	21.1657	549.791	1984.89
92959	2.74311	8.32667e-17	4.30408	3.30288	6.97653	838.073	8.32667e-17	8.32667e-17	1.50011	8.32667e-17	1013.67	1982.55
169561	26.3692	1.22207	8.32667e-17	8.32667e-17	12.5331	560.222	0.0405159	8.32667e-17	7.35175	13.6206	847.708	1981.38
154387	33.3372	8.32667e-17	8.32667e-17	8.32667e-17	4.19837	283.679	8.32667e-17	1.80339	8.32667e-17	4.56662	554.285	1980.21
134809	19.4232	8.32667e-17	4.30408	8.18453	34.7598	763.554	8.32667e-17	8.32667e-17	16.1305	25.6928	947.172	1979.04
168966	72.3647	8.32667e-17	8.32667e-17	1.67616	8.36567	480.038	8.32667e-17	8.32667e-17	1.50011	13.6206	635.196	1975.53
168177	29.6928	8.32667e-17	8.32667e-17	1.67616	2.80941	361.766	8.32667e-17	8.32667e-17	8.32667e-17	4.56662	542.705	1975.53
111166	32.2828	0.0353364	1.45761	3.30288	16.7007	491.801	1.25767	8.32667e-17	7.35175	13.6206	586.645	1974.36
101828	9.47033	0.0353364	8.32667e-17	1.67616	12.5331	491.352	1.25767	8.32667e-17	1.50011	7.58448	478.678	1973.19
40576	35.6062	8.32667e-17	2.88075	8.32667e-17	12.5331	466.849	8.32667e-17	1.80339	8.32667e-17	10.6025	656.736	1970.85
172281	6.25744	8.32667e-17	1.45761	8.32667e-17	8.36567	442.636	8.32667e-17	8.32667e-17	8.32667e-17	12.1115	555.341	1967.34
164023	68.2858	8.32667e-17	8.32667e-17	1.67616	12.5331	408.124	8.32667e-17	8.32667e-17	2.96278	9.09348	540.297	1967.34
163390	42.7338	8.32667e-17	8.32667e-17	8.32667e-17	5.58742	513.041	8.32667e-17	8.32667e-17	8.32667e-17	9.09348	593.499	1963.84
155231	87.9241	8.32667e-17	8.32667e-17	8.32667e-17	5.58742	325.655	8.32667e-17	8.32667e-17	1.50011	1.54936	453.415	1962.67
166586	154.88	8.32667e-17	1.45761	6.55721	20.8682	626.187	8.32667e-17	8.32667e-17	5.88868	15.1296	708.79	1960.33
170521	14.2412	8.32667e-17	1.45761	1.67616	5.58742	640.457	8.32667e-17	8.32667e-17	4.42566	4.56662	612.943	1960.33
169387	29.0281	8.32667e-17	8.32667e-17	8.32667e-17	12.5331	527.494	8.32667e-17	8.32667e-17	2.96278	1.54936	558.467	1957.99
174551	37.1876	0.0353364	1.45761	3.30288	23.6465	575.456	1.25767	8.32667e-17	4.42566	3.05786	615.384	1956.82
121688	31.1598	8.32667e-17	8.32667e-17	3.30288	13.9223	518.48	8.32667e-17	8.32667e-17	4.42566	3.05786	631.333	1956.82
139214	24.2603	8.32667e-17	1.45761	1.67616	9.75482	484.186	8.32667e-17	8.32667e-17	4.42566	12.1115	689.243	1952.14
169738	53.0924	8.32667e-17	5.72753	1.67616	8.36567	683.107	8.32667e-17	8.32667e-17	2.96278	19.6567	664.423	1950.97
44171	73.7855	8.32667e-17	1.45761	8.32667e-17	12.5331	482.428	8.32667e-17	8.32667e-17	2.96278	12.1115	562.299	1949.8
99451	37.1418	8.32667e-17	8.32667e-17	3.30288	6.97653	544.019	8.32667e-17	8.32667e-17	2.96278	1.54936	739.518	1949.8
171954	9.49327	1.22207	8.32667e-17	8.32667e-17	1.42063	491.474	0.0405159	8.32667e-17	8.32667e-17	3.05786	505.662	1949.8
99885	15.7088	8.32667e-17	8.32667e-17	1.67616	11.144	494.291	8.32667e-17	8.32667e-17	8.32667e-17	21.1657	544.811	1948.63
128468	10.3651	8.32667e-17	8.32667e-17	8.32667e-17	9.75482	681.565	8.32667e-17	8.32667e-17	1.50011	4.56662	604.989	1947.46
21105	24.4208	1.22207	8.32667e-17	8.32667e-17	6.97653	551.782	0.0405159	8.32667e-17	8.32667e-17	1.54936	674.706	1941.61
164713	32.9017	8.32667e-17	8.32667e-17	8.32667e-17	9.75482	405.715	8.32667e-17	8.32667e-17	8.32667e-17	4.56662	607.779	1941.61
22572	1.98462	8.32667e-17	1.45761	1.67616	5.58742	458.271	8.32667e-17	8.32667e-17	8.32667e-17	1.54936	490.653	1940.44
168002	7.22152	8.32667e-17	8.32667e-17	8.32667e-17	4.19837	458.842	8.32667e-17	8.32667e-17	8.32667e-17	3.05786	640.487	1940.44
166787	53.8257	8.32667e-17	8.32667e-17	8.32667e-17	11.144	473.422	8.32667e-17	8.32667e-17	4.42566	4.56662	639.213	1940.44
165735	54.8799	8.32667e-17	2.88075	4.92996	13.9223	684.466	8.32667e-17	8.32667e-17	1.50011	7.58448	673.884	1938.1
165863	30.4034	0.0353364	1.45761	8.32667e-17	6.97653	484.082	1.25767	8.32667e-17	13.2042	6.07552	655.474	1938.1
163566	52.5653	8.32667e-17	1.45761	1.67616	4.19837	480.065	8.32667e-17	8.32667e-17	1.50011	6.07552	643.299	1938.1
163533	1.02045	8.32667e-17	8.32667e-17	8.32667e-17	2.80941	427.174	8.32667e-17	1.80339	8.32667e-17	3.05786	690.289	1938.1
167236	50.8466	8.32667e-17	8.32667e-17	1.67616	18.0898	614.436	8.32667e-17	8.32667e-17	4.42566	30.2199	773.601	1936.93
149193	64.5047	8.32667e-17	2.88075	3.30288	5.58742	589.268	8.32667e-17	8.32667e-17	4.42566	9.09348	789.714	1935.76
163593	32.1912	8.32667e-17	1.45761	1.67616	6.97653	428.268	8.32667e-17	8.32667e-17	8.32667e-17	9.09348	614.661	1935.76
115439	37.8293	8.32667e-17	8.32667e-17	8.32667e-17	11.144	442.594	8.32667e-17	8.32667e-17	1.50011	6.07552	544.543	1935.76
163576	124.45	8.32667e-17	1.45761	1.67616	16.7007	773.455	8.32667e-17	8.32667e-17	4.42566	10.6025	1265.08	1934.6
167119	23.5726	0.0353364	8.32667e-17	3.30288	11.144	530.281	1.25767	8.32667e-17	5.88868	13.6206	593.58	1933.43
19104	91.0864	8.32667e-17	1.45761	3.30288	11.144	438.71	8.32667e-17	1.80339	1.50011	6.07552	568.817	1929.92
163757	188.381	0.0353364	8.32667e-17	3.30288	48.6514	861.593	1.25767	5.2951	8.81486	30.2199	854.184	1928.75
162760	30.2659	8.32667e-17	8.32667e-17	3.30288	9.75482	421.491	8.32667e-17	8.32667e-17	1.50011	6.07552	571.419	1928.75
167746	28.9135	8.32667e-17	1.45761	1.67616	12.5331	464.096	8.32667e-17	8.32667e-17	5.88868	12.1115	625.66	1927.58
119986	46.4006	0.0353364	1.45761	8.32667e-17	8.36567	347.101	1.25767	8.32667e-17	2.96278	4.56662	516.966	1927.58
163525	20.6612	8.32667e-17	8.32667e-17	4.92996	6.97653	616.834	8.32667e-17	8.32667e-17	2.96278	15.1296	688.489	1926.41
152153	38.7461	8.32667e-17	8.32667e-17	3.30288	8.36567	426.787	8.32667e-17	8.32667e-17	4.42566	9.09348	570.1	1926.41
157748	29.8304	8.32667e-17	1.45761	1.67616	5.58742	405.776	8.32667e-17	8.32667e-17	4.42566	10.6025	626.684	1925.24
181982	69.8211	8.32667e-17	8.32667e-17	3.30288	15.3115	567.517	8.32667e-17	8.32667e-17	7.35175	15.1296	620.752	1922.9
166997	31.2973	8.32667e-17	2.88075	1.67616	15.3115	679.614	8.32667e-17	8.32667e-17	2.96278	12.1115	826.561	1921.73
166781	68.2628	8.32667e-17	8.32667e-17	8.32667e-17	15.3115	574.307	8.32667e-17	8.32667e-17	4.42566	12.1115	666.7	1920.56
177505	17.5203	8.32667e-17	1.45761	1.67616	4.19837	642.933	8.32667e-17	1.80339	8.32667e-17	4.56662	567.042	1919.39
168208	29.2115	8.32667e-17	8.32667e-17	1.67616	5.58742	329.952	8.32667e-17	8.32667e-17	1.50011	7.58448	534.389	1919.39
164347	37.2564	8.32667e-17	2.88075	3.30288	8.36567	365.684	8.32667e-17	8.32667e-17	2.96278	7.58448	527.886	1918.22
159456	28.18	8.32667e-17	1.45761	8.32667e-17	1.42063	210.159	8.32667e-17	8.32667e-17	8.32667e-17	3.05786	358.062	1914.71
120813	26.1629	8.32667e-17	2.88075	8.32667e-17	9.75482	520.937	8.32667e-17	8.32667e-17	4.42566	7.58448	577.336	1913.54
24816	40.74	8.32667e-17	1.45761	3.30288	12.5331	585.308	8.32667e-17	8.32667e-17	2.96278	7.58448	797.806	1912.37
44742	2.39834	8.32667e-17	8.32667e-17	3.30288	12.5331	775.012	8.32667e-17	1.80339	8.32667e-17	1.54936	760.661	1911.2
21946	28.3634	8.32667e-17	8.32667e-17	8.32667e-17	15.3115	459.797	8.32667e-17	8.32667e-17	1.50011	6.07552	537.887	1910.03
103951	37.8981	8.32667e-17	2.88075	8.32667e-17	5.58742	425.661	8.32667e-17	8.32667e-17	1.50011	6.07552	628.15	1908.86
166271	21.6241	8.32667e-17	2.88075	8.32667e-17	20.8682	474.842	8.32667e-17	8.32667e-17	5.88868	9.09348	668.934	1907.69
141598	95.1652	0.0353364	1.45761	8.32667e-17	6.97653	424.476	1.25767	8.32667e-17	1.50011	12.1115	674.064	1907.69
25104	1.52508	1.29127	1.45761	1.67616	13.9223	743.834	1.33789	3.54902	8.32667e-17	3.05786	575.484	1907.69
161131	52.6112	1.22207	1.45761	3.30288	6.97653	499.716	0.0405159	8.32667e-17	1.50011	7.58448	575.884	1906.52
168930	21.6699	8.32667e-17	2.88075	1.67616	4.19837	522.263	8.32667e-17	8.32667e-17	1.50011	9.09348	577.342	1905.35
47177	7.58873	8.32667e-17	2.88075	8.32667e-17	9.75482	468.825	8.32667e-17	8.32667e-17	8.32667e-17	6.07552	479.915	1905.35
167672	46.8819	8.32667e-17	1.45761	8.32667e-17	9.75482	606.565	8.32667e-17	8.32667e-17	1.50011	3.05786	807.355	1905.35
163077	21.4865	8.32667e-17	8.32667e-17	8.32667e-17	18.0898	450.83	8.32667e-17	8.32667e-17	5.88868	13.6206	622.888	1905.35
168897	22.3347	8.32667e-17	8.32667e-17	1.67616	15.3115	404.394	8.32667e-17	8.32667e-17	13.2042	12.1115	609.121	1905.35
27795	55.6361	8.32667e-17	2.88075	9.8119	38.9273	635.256	8.32667e-17	1.80339	27.8356	67.945	642.635	1904.18
169159	43.1922	8.32667e-17	1.45761	6.55721	12.5331	444.284	8.32667e-17	1.80339	7.35175	10.6025	648.512	1901.85
40944	32.81	0.0353364	1.45761	1.67616	8.32667e-17	564.775	1.25767	3.54902	8.32667e-17	1.54936	596.434	1899.51
37086	55.7049	8.32667e-17	1.45761	8.32667e-17	13.9223	466.581	8.32667e-17	8.32667e-17	2.96278	10.6025	578.417	1898.34
168698	63.313	8.32667e-17	1.45761	6.55721	9.75482	405.871	8.32667e-17	8.32667e-17	2.96278	7.58448	657.747	1897.17
155346	55.7278	8.32667e-17	1.45761	8.32667e-17	15.3115	396.425	8.32667e-17	8.32667e-17	2.96278	7.58448	603.672	1896
175712	4.62714	8.32667e-17	8.32667e-17	8.32667e-17	6.97653	547.445	8.32667e-17	8.32667e-17	1.50011	3.05786	573.406	1896
168866	18.7813	0.0353364	8.32667e-17	8.32667e-17	11.144	467.867	1.25767	8.32667e-17	1.50011	3.05786	567.624	1894.83
153711	13.8972	1.22207	8.32667e-17	8.32667e-17	2.80941	327.308	0.0405159	8.32667e-17	1.50011	4.56662	535.719	1892.49
147190	59.6694	8.32667e-17	2.88075	3.30288	18.0898	626.101	8.32667e-17	8.32667e-17	2.96278	13.6206	681.771	1891.32
149231	36.0187	0.0353364	1.45761	1.67616	12.5331	471.904	1.25767	8.32667e-17	5.88868	10.6025	583.844	1886.64
162848	1.47915	8.32667e-17	8.32667e-17	1.67616	5.58742	500.195	8.32667e-17	3.54902	8.32667e-17	8.32667e-17	721.746	1884.3
173663	20.7988	8.32667e-17	8.32667e-17	6.55721	12.5331	531.733	8.32667e-17	8.32667e-17	2.96278	12.1115	628.694	1878.45
168230	71.471	8.32667e-17	1.45761	1.67616	6.97653	478.676	8.32667e-17	8.32667e-17	2.96278	9.09348	624.385	1876.11
34045	16.0528	8.32667e-17	8.32667e-17	8.32667e-17	9.75482	399.062	8.32667e-17	8.32667e-17	5.88868	1.54936	599.638	1876.11
163281	34.9874	8.32667e-17	8.32667e-17	1.67616	5.58742	432.033	8.32667e-17	8.32667e-17	4.42566	6.07552	555.282	1876.11
87804	44.8423	8.32667e-17	4.30408	4.92996	5.58742	522.567	8.32667e-17	1.80339	8.81486	16.6386	663.766	1874.94
117274	36.3625	8.32667e-17	1.45761	1.67616	11.144	473.014	8.32667e-17	8.32667e-17	8.32667e-17	10.6025	528.509	1874.94
155772	31.4119	8.32667e-17	2.88075	8.32667e-17	8.36567	406.669	8.32667e-17	1.80339	4.42566	10.6025	507.903	1872.6
169009	37.348	8.32667e-17	1.45761	8.32667e-17	6.97653	461.615	8.32667e-17	1.80339	1.50011	15.1296	679.671	1872.6
168456	32.9475	8.32667e-17	8.32667e-17	1.67616	11.144	542.56	8.32667e-17	8.32667e-17	1.50011	9.09348	694.927	1871.43
152998	0.0593439	8.32667e-17	1.45761	4.92996	11.144	1056.25	8.32667e-17	1.80339	8.32667e-17	1.54936	1160.33	1865.59
165071	61.8006	8.32667e-17	1.45761	1.67616	18.0898	459.893	8.32667e-17	8.32667e-17	11.7411	10.6025	562.183	1865.59
91083	15.1585	8.32667e-17	8.32667e-17	1.67616	9.75482	515.284	8.32667e-17	8.32667e-17	1.50011	3.05786	493.632	1864.42
39839	40.6483	8.32667e-17	8.32667e-17	3.30288	8.36567	361.978	8.32667e-17	8.32667e-17	8.32667e-17	4.56662	604.805	1863.25
168428	44.9798	8.32667e-17	2.88075	1.67616	11.144	479.941	8.32667e-17	1.80339	8.32667e-17	7.58448	606.838	1862.08
169112	314.384	0.0353364	2.88075	1.67616	12.5331	345.798	1.25767	1.80339	1.50011	6.07552	522.355	1860.91
178215	54.307	8.32667e-17	1.45761	3.30288	30.5923	615.516	8.32667e-17	8.32667e-17	4.42566	15.1296	691.185	1859.74
121814	12.7047	8.32667e-17	8.32667e-17	8.32667e-17	1.42063	333.185	8.32667e-17	8.32667e-17	8.32667e-17	7.58448	372.601	1859.74
162246	30.6097	8.32667e-17	2.88075	8.32667e-17	27.814	546.139	8.32667e-17	8.32667e-17	5.88868	9.09348	578.801	1858.57
164838	34.529	1.22207	8.32667e-17	1.67616	9.75482	473.34	0.0405159	8.32667e-17	1.50011	6.07552	614.905	1858.57
47098	128.3	8.32667e-17	1.45761	1.67616	26.4248	485.496	8.32667e-17	8.32667e-17	11.7411	40.783	683.846	1850.38
169347	50.1361	8.32667e-17	8.32667e-17	8.32667e-17	13.9223	462.33	8.32667e-17	8.32667e-17	1.50011	9.09348	509.562	1850.38
144310	4.25963	8.32667e-17	8.32667e-17	8.32667e-17	2.80941	344.066	8.32667e-17	8.32667e-17	4.42566	4.56662	427.929	1850.38
108740	26.0483	8.32667e-17	1.45761	8.32667e-17	4.19837	388.401	8.32667e-17	8.32667e-17	8.32667e-17	9.09348	582.021	1849.21
165029	14.5852	8.32667e-17	8.32667e-17	8.32667e-17	2.80941	441.683	8.32667e-17	8.32667e-17	8.32667e-17	7.58448	664.705	1849.21
115761	38.4252	8.32667e-17	1.45761	1.67616	13.9223	454.994	8.32667e-17	8.32667e-17	2.96278	6.07552	682.337	1848.04
89459	50.2278	8.32667e-17	8.32667e-17	4.92996	11.144	430.682	8.32667e-17	8.32667e-17	8.32667e-17	18.1477	548.525	1845.7
20091	32.9017	8.32667e-17	1.45761	3.30288	15.3115	608.593	8.32667e-17	1.80339	4.42566	24.1838	607.418	1844.53
167547	79.331	8.32667e-17	1.45761	8.32667e-17	4.19837	378.899	8.32667e-17	8.32667e-17	5.88868	10.6025	519.875	1844.53
31852	163.931	8.32667e-17	8.32667e-17	8.32667e-17	4.19837	501.254	8.32667e-17	8.32667e-17	8.32667e-17	3.05786	635.302	1844.53
164366	52.2903	8.32667e-17	1.45761	3.30288	19.479	548.044	8.32667e-17	8.32667e-17	7.35175	16.6386	755.75	1843.36
167377	38.8836	8.32667e-17	8.32667e-17	1.67616	18.0898	505.03	8.32667e-17	8.32667e-17	2.96278	21.1657	578.61	1843.36
162356	50.182	8.32667e-17	8.32667e-17	1.67616	13.9223	374.876	8.32667e-17	8.32667e-17	10.278	15.1296	507.706	1842.19
165140	19.8588	8.32667e-17	2.88075	8.32667e-17	5.58742	623.084	8.32667e-17	8.32667e-17	8.32667e-17	1.54936	580.469	1839.85
166179	22.6786	8.32667e-17	8.32667e-17	1.67616	11.144	459.867	8.32667e-17	8.32667e-17	4.42566	4.56662	555.434	1839.85
167127	40.9921	8.32667e-17	2.88075	8.32667e-17	4.19837	398.939	8.32667e-17	8.32667e-17	1.50011	6.07552	564.537	1838.68
151611	38.0356	8.32667e-17	8.32667e-17	8.32667e-17	12.5331	388.193	8.32667e-17	8.32667e-17	5.88868	4.56662	525.331	1836.35
158178	36.1333	8.32667e-17	8.32667e-17	8.32667e-17	1.42063	470.312	8.32667e-17	8.32667e-17	1.50011	8.32667e-17	516.351	1835.18
110191	92.5988	1.22207	1.45761	6.55721	19.479	596.825	0.0405159	1.80339	8.81486	19.6567	655.989	1834.01
168581	27.309	8.32667e-17	8.32667e-17	8.32667e-17	4.19837	471.919	8.32667e-17	8.32667e-17	2.96278	7.58448	587.895	1832.84
163005	16.8553	1.22207	8.32667e-17	3.30288	8.36567	384.12	0.0405159	8.32667e-17	1.50011	3.05786	501.019	1832.84
96588	18.6896	8.32667e-17	2.88075	8.32667e-17	9.75482	291.78	8.32667e-17	8.32667e-17	4.42566	6.07552	607.007	1831.67
164296	18.3227	8.32667e-17	8.32667e-17	8.32667e-17	6.97653	491.845	8.32667e-17	1.80339	2.96278	19.6567	598.797	1828.16
167480	31.7328	8.32667e-17	8.32667e-17	1.67616	6.97653	462.634	8.32667e-17	8.32667e-17	4.42566	18.1477	586.496	1826.99
169336	16.328	8.32667e-17	8.32667e-17	1.67616	5.58742	412.104	8.32667e-17	8.32667e-17	2.96278	7.58448	541.67	1826.99
108117	30.5638	8.32667e-17	4.30408	8.32667e-17	9.75482	387	8.32667e-17	8.32667e-17	7.35175	10.6025	560.414	1825.82
168373	145.05	8.32667e-17	4.30408	3.30288	50.0406	821.609	8.32667e-17	1.80339	7.35175	37.7649	802.701	1824.65
141163	33.8185	8.32667e-17	8.32667e-17	8.32667e-17	15.3115	546.569	8.32667e-17	1.80339	2.96278	13.6206	704.401	1824.65
95539	12.9799	1.22207	8.32667e-17	8.32667e-17	8.36567	511.294	0.0405159	8.32667e-17	1.50011	6.07552	490.915	1823.48
162219	13.0716	8.32667e-17	1.45761	1.67616	23.6465	837.299	8.32667e-17	1.80339	8.32667e-17	8.32667e-17	721.658	1822.31
166500	22.3806	8.32667e-17	1.45761	8.32667e-17	2.80941	357.598	8.32667e-17	8.32667e-17	8.32667e-17	4.56662	492.752	1822.31
88794	2.58222	8.32667e-17	8.32667e-17	3.30288	6.97653	481.118	8.32667e-17	8.32667e-17	1.50011	6.07552	566.342	1822.31
168073	175.274	8.32667e-17	5.72753	9.8119	77.8236	794.723	8.32667e-17	3.54902	14.6674	36.2559	695.86	1821.14
166420	11.4661	8.32667e-17	1.45761	1.67616	8.36567	386.665	8.32667e-17	1.80339	1.50011	3.05786	476.753	1821.14
138170	2.03059	8.32667e-17	8.32667e-17	8.32667e-17	6.97653	546.021	8.32667e-17	8.32667e-17	8.32667e-17	1.54936	549.102	1818.8
167248	7.29037	8.32667e-17	8.32667e-17	8.32667e-17	9.75482	231.959	8.32667e-17	8.32667e-17	1.50011	9.09348	521.442	1816.46
162780	49.1278	8.32667e-17	1.45761	1.67616	8.36567	417.501	8.32667e-17	8.32667e-17	2.96278	7.58448	567.347	1812.95
29361	42.1838	8.32667e-17	1.45761	8.32667e-17	22.2573	547.754	8.32667e-17	8.32667e-17	5.88868	27.2018	659.83	1810.61
157589	48.7382	1.22207	1.45761	3.30288	15.3115	367.014	0.0405159	3.54902	8.32667e-17	12.1115	529.245	1810.61
176441	36.7751	8.32667e-17	8.32667e-17	1.67616	4.19837	390.9	8.32667e-17	8.32667e-17	2.96278	4.56662	540.193	1810.61
160700	33.7497	8.32667e-17	8.32667e-17	1.67616	8.36567	540.891	8.32667e-17	8.32667e-17	2.96278	10.6025	593.628	1808.27
177065	0.974694	8.32667e-17	8.32667e-17	8.32667e-17	5.58742	652.172	8.32667e-17	8.32667e-17	8.32667e-17	8.32667e-17	554.925	1808.27
164928	14.3559	8.32667e-17	2.88075	1.67616	4.19837	295.761	8.32667e-17	8.32667e-17	8.32667e-17	3.05786	609.738	1807.1
91280	67.667	8.32667e-17	1.45761	8.32667e-17	12.5331	424.542	8.32667e-17	8.32667e-17	8.32667e-17	9.09348	697.029	1807.1
139094	67.14	8.32667e-17	8.32667e-17	4.92996	29.2032	520.947	8.32667e-17	1.80339	8.81486	24.1838	580.036	1807.1
158679	3.36361	8.32667e-17	8.32667e-17	8.32667e-17	4.19837	359.161	8.32667e-17	8.32667e-17	8.32667e-17	8.32667e-17	554.835	1803.6
142644	57.6299	8.32667e-17	8.32667e-17	1.67616	6.97653	401.324	8.32667e-17	8.32667e-17	8.32667e-17	16.6386	497.078	1802.43
141618	38.7919	8.32667e-17	5.72753	1.67616	12.5331	433.306	8.32667e-17	8.32667e-17	5.88868	19.6567	541.792	1801.26
175288	17.7954	1.22207	1.45761	1.67616	12.5331	574.267	0.0405159	8.32667e-17	8.32667e-17	8.32667e-17	654.544	1800.09
165773	44.2464	8.32667e-17	1.45761	3.30288	13.9223	603.801	8.32667e-17	8.32667e-17	4.42566	7.58448	766.801	1798.92
165536	69.3399	0.0353364	8.32667e-17	1.67616	23.6465	519.499	1.25767	8.32667e-17	8.32667e-17	6.07552	548.981	1798.92
164086	201.189	8.32667e-17	5.72753	17.9489	155.616	1511.7	8.32667e-17	7.04137	33.6881	125.286	950.155	1797.75
167291	153.941	0.0353364	2.88075	8.18453	55.5972	1021.1	1.25767	8.32667e-17	7.35175	70.963	893.806	1797.75
174231	50.0445	8.32667e-17	8.32667e-17	6.55721	12.5331	457.173	8.32667e-17	8.32667e-17	7.35175	18.1477	544.622	1796.58
92221	28.5926	8.32667e-17	1.45761	3.30288	12.5331	451.919	8.32667e-17	1.80339	8.32667e-17	6.07552	556.741	1795.41
168874	2.92697	8.32667e-17	1.45761	1.67616	8.36567	279.145	8.32667e-17	1.80339	1.50011	4.56662	409.911	1794.24
154181	19.0335	8.32667e-17	2.88075	8.32667e-17	1.42063	340.128	8.32667e-17	8.32667e-17	1.50011	8.32667e-17	434.642	1793.07
164440	10.4339	8.32667e-17	8.32667e-17	8.32667e-17	5.58742	370.946	8.32667e-17	8.32667e-17	8.32667e-17	8.32667e-17	518.475	1793.07
86593	30.7701	8.32667e-17	1.45761	1.67616	13.9223	715.795	8.32667e-17	8.32667e-17	1.50011	9.09348	965.941	1791.9
167965	57.4465	0.0353364	8.32667e-17	8.32667e-17	13.9223	470.984	1.25767	8.32667e-17	8.81486	6.07552	709.44	1791.9
168156	57.309	8.32667e-17	8.32667e-17	4.92996	9.75482	407.084	8.32667e-17	1.80339	1.50011	4.56662	621.29	1791.9
164515	71.1273	8.32667e-17	1.45761	4.92996	18.0898	425.268	8.32667e-17	1.80339	7.35175	15.1296	520.155	1790.73
170869	17.8871	8.32667e-17	8.32667e-17	1.67616	12.5331	380.244	8.32667e-17	8.32667e-17	1.50011	7.58448	525.281	1790.73
175961	48.6465	8.32667e-17	8.32667e-17	1.67616	5.58742	420.121	8.32667e-17	8.32667e-17	4.42566	13.6206	559.263	1789.56
160094	15.1814	8.32667e-17	2.88075	1.67616	9.75482	426.577	8.32667e-17	1.80339	1.50011	19.6567	516.114	1788.39
157202	16.9929	8.32667e-17	1.45761	1.67616	8.36567	455.793	8.32667e-17	8.32667e-17	5.88868	7.58448	531.118	1788.39
165747	7.42808	8.32667e-17	8.32667e-17	1.67616	11.144	451.62	8.32667e-17	8.32667e-17	8.32667e-17	8.32667e-17	485.221	1788.39
130590	13.4386	8.32667e-17	8.32667e-17	1.67616	9.75482	444.081	8.32667e-17	8.32667e-17	2.96278	6.07552	587.746	1787.22
167846	42.7338	8.32667e-17	1.45761	8.32667e-17	1.42063	499.637	8.32667e-17	1.80339	2.96278	6.07552	555.636	1780.2
162206	56.1861	1.22207	2.88075	8.32667e-17	9.75482	315.64	0.0405159	3.54902	1.50011	13.6206	613.938	1779.03
164789	23.0683	8.32667e-17	4.30408	3.30288	16.7007	425.201	8.32667e-17	8.32667e-17	1.50011	10.6025	503.963	1777.86
47960	44.4985	8.32667e-17	8.32667e-17	1.67616	6.97653	421.623	8.32667e-17	1.80339	1.50011	9.09348	609.222	1777.86
107585	22.4952	8.32667e-17	1.45761	3.30288	9.75482	420.121	8.32667e-17	8.32667e-17	1.50011	9.09348	559.263	1776.69
98544	18.7354	8.32667e-17	2.88075	8.32667e-17	4.19837	563.312	8.32667e-17	8.32667e-17	8.32667e-17	15.1296	561.326	1775.52
46675	13.8972	1.22207	8.32667e-17	8.32667e-17	15.3115	549.646	0.0405159	8.32667e-17	1.50011	33.2379	469.499	1775.52
167742	46.7673	0.0353364	2.88075	8.32667e-17	20.8682	443.849	1.25767	8.32667e-17	4.42566	12.1115	527.006	1772.02
24311	44.3381	8.32667e-17	1.45761	3.30288	16.7007	353.785	8.32667e-17	1.80339	2.96278	6.07552	533.205	1770.85
164249	11.1909	8.32667e-17	1.45761	1.67616	2.80941	292.799	8.32667e-17	8.32667e-17	1.50011	6.07552	511.168	1770.85
163392	30.22	8.32667e-17	1.45761	8.32667e-17	13.9223	527.773	8.32667e-17	8.32667e-17	2.96278	12.1115	634.078	1769.68
169146	53.482	1.22207	8.32667e-17	1.67616	11.144	553.355	0.0405159	5.2951	4.42566	4.56662	757.126	1768.51
184979	0.475788	8.32667e-17	1.45761	1.67616	1.42063	467.739	8.32667e-17	8.32667e-17	1.50011	1.54936	535.23	1766.17
175424	16.8324	8.32667e-17	1.45761	8.32667e-17	13.9223	520.736	8.32667e-17	8.32667e-17	1.50011	7.58448	527.392	1762.66
167406	26.7131	8.32667e-17	8.32667e-17	6.55721	18.0898	417.573	8.32667e-17	8.32667e-17	13.2042	13.6206	587.596	1761.49
148627	23.16	8.32667e-17	8.32667e-17	8.32667e-17	12.5331	320.504	8.32667e-17	8.32667e-17	4.42566	13.6206	487.095	1761.49
150187	39.7316	8.32667e-17	2.88075	1.67616	2.80941	306.128	8.32667e-17	8.32667e-17	4.42566	7.58448	536.912	1760.32
159424	76.1916	8.32667e-17	8.32667e-17	3.30288	11.144	393.792	8.32667e-17	8.32667e-17	2.96278	15.1296	609.057	1759.15
167700	25.6357	8.32667e-17	1.45761	8.32667e-17	6.97653	381.72	8.32667e-17	8.32667e-17	1.50011	4.56662	565.78	1756.81
170389	0.217038	8.32667e-17	8.32667e-17	1.67616	8.32667e-17	957.429	8.32667e-17	8.32667e-17	1.50011	8.32667e-17	931.509	1756.81
164798	2.72012	8.32667e-17	8.32667e-17	8.32667e-17	15.3115	639.958	8.32667e-17	8.32667e-17	8.32667e-17	18.1477	492.788	1756.81
162147	61.686	8.32667e-17	1.45761	1.67616	6.97653	478.398	8.32667e-17	1.80339	4.42566	7.58448	548.781	1755.64
167000	53.4361	8.32667e-17	8.32667e-17	3.30288	4.19837	296.704	8.32667e-17	8.32667e-17	1.50011	8.32667e-17	493.659	1755.64
181310	12.3836	8.32667e-17	1.45761	8.32667e-17	11.144	377.574	8.32667e-17	8.32667e-17	1.50011	7.58448	519.867	1754.47
142296	31.7328	8.32667e-17	8.32667e-17	3.30288	6.97653	349.917	8.32667e-17	8.32667e-17	4.42566	7.58448	562.872	1754.47
163039	77.9561	8.32667e-17	1.45761	3.30288	12.5331	593.288	8.32667e-17	8.32667e-17	8.32667e-17	25.6928	804.597	1753.3
166417	17.8642	8.32667e-17	8.32667e-17	8.32667e-17	9.75482	494.417	8.32667e-17	8.32667e-17	10.278	12.1115	577.208	1750.96
139516	37.7835	1.22207	1.45761	8.32667e-17	5.58742	297.65	0.0405159	8.32667e-17	1.50011	8.32667e-17	407.366	1749.79
136852	47.1111	0.0353364	1.45761	1.67616	11.144	372.09	1.25767	8.32667e-17	4.42566	7.58448	475.312	1748.62
165788	24.375	8.32667e-17	1.45761	8.32667e-17	1.42063	415.789	8.32667e-17	8.32667e-17	2.96278	13.6206	472.882	1748.62
167303	51.0299	1.22207	8.32667e-17	1.67616	8.36567	433.197	0.0405159	1.80339	1.50011	15.1296	514.802	1748.62
166120	41.9775	8.32667e-17	1.45761	8.32667e-17	2.80941	490.614	8.32667e-17	3.54902	5.88868	4.56662	625.796	1743.94
167907	29.5095	8.32667e-17	8.32667e-17	4.92996	9.75482	411.863	8.32667e-17	8.32667e-17	8.32667e-17	7.58448	483.65	1743.94
43203	30.5638	8.32667e-17	8.32667e-17	8.32667e-17	9.75482	460.731	8.32667e-17	8.32667e-17	1.50011	9.09348	450.199	1743.94
163062	55.6132	8.32667e-17	2.88075	4.92996	12.5331	458.872	8.32667e-17	8.32667e-17	4.42566	18.1477	649.941	1741.6
39744	35.9041	8.32667e-17	4.30408	8.32667e-17	8.36567	455.738	8.32667e-17	1.80339	8.32667e-17	12.1115	517.624	1740.44
168690	30.793	1.29127	4.30408	1.67616	12.5331	429	1.33789	8.32667e-17	5.88868	7.58448	464.865	1740.44
100740	3.15679	8.32667e-17	8.32667e-17	3.30288	23.6465	521.913	8.32667e-17	8.32667e-17	1.50011	3.05786	493.662	1740.44
162284	30.793	8.32667e-17	1.45761	1.67616	9.75482	491.682	8.32667e-17	8.32667e-17	2.96278	4.56662	555.596	1739.27
174109	28.3634	8.32667e-17	1.45761	1.67616	5.58742	373.683	8.32667e-17	8.32667e-17	4.42566	10.6025	541.434	1738.1
108243	57.4007	8.32667e-17	8.32667e-17	8.32667e-17	2.80941	467.666	8.32667e-17	8.32667e-17	5.88868	7.58448	517.686	1738.1
169025	25.7503	8.32667e-17	4.30408	4.92996	15.3115	497.543	8.32667e-17	1.80339	2.96278	4.56662	721.733	1735.76
130531	32.9246	1.22207	1.45761	1.67616	6.97653	433.258	0.0405159	8.32667e-17	4.42566	9.09348	529.646	1735.76
95037	15.7547	8.32667e-17	8.32667e-17	1.67616	13.9223	413.54	8.32667e-17	8.32667e-17	5.88868	22.6747	571.373	1735.76
167915	52.0841	1.22207	2.88075	4.92996	6.97653	402.798	0.0405159	8.32667e-17	1.50011	4.56662	533.517	1734.59
22313	27.3319	1.22207	8.32667e-17	3.30288	5.58742	590.163	0.0405159	8.32667e-17	1.50011	3.05786	647.858	1731.08
169193	131.187	8.32667e-17	2.88075	8.18453	34.7598	668.738	8.32667e-17	8.32667e-17	19.0568	27.2018	735.975	1728.74
164936	75.2292	8.32667e-17	8.32667e-17	8.32667e-17	8.36567	497.456	8.32667e-17	8.32667e-17	1.50011	4.56662	692.011	1727.57
119129	11.8102	1.22207	8.32667e-17	3.30288	12.5331	364.426	0.0405159	8.32667e-17	8.32667e-17	10.6025	545.422	1726.4
125506	5.20128	8.32667e-17	8.32667e-17	8.32667e-17	9.75482	478.322	8.32667e-17	8.32667e-17	8.32667e-17	4.56662	529.886	1726.4
166806	26.0254	8.32667e-17	1.45761	1.67616	11.144	410.721	8.32667e-17	1.80339	10.278	16.6386	526.817	1725.23
109946	22.8162	8.32667e-17	8.32667e-17	8.32667e-17	2.80941	172.017	8.32667e-17	8.32667e-17	8.32667e-17	8.32667e-17	392.659	1725.23
168706	17.0617	8.32667e-17	2.88075	8.32667e-17	8.36567	364.401	8.32667e-17	8.32667e-17	4.42566	3.05786	538.674	1722.89
163628	28.6843	8.32667e-17	8.32667e-17	8.32667e-17	13.9223	454.125	8.32667e-17	8.32667e-17	8.32667e-17	9.09348	454.211	1722.89
94188	12.8194	8.32667e-17	8.32667e-17	8.32667e-17	5.58742	348.115	8.32667e-17	8.32667e-17	1.50011	9.09348	444.135	1722.89
168604	8.43782	8.32667e-17	1.45761	4.92996	8.36567	371.173	8.32667e-17	8.32667e-17	8.32667e-17	1.54936	580.562	1720.55
94094	30.0596	0.0353364	1.45761	8.32667e-17	11.144	363.159	1.25767	8.32667e-17	1.50011	6.07552	561.611	1717.04
40048	155.316	8.32667e-17	2.88075	3.30288	12.5331	538.374	8.32667e-17	8.32667e-17	2.96278	15.1296	631.426	1715.87
162044	23.756	8.32667e-17	8.32667e-17	8.32667e-17	6.97653	396.098	8.32667e-17	8.32667e-17	8.32667e-17	8.32667e-17	514.585	1715.87
165067	19.2169	8.32667e-17	8.32667e-17	8.32667e-17	12.5331	312.64	8.32667e-17	8.32667e-17	4.42566	3.05786	507.273	1715.87
96792	38.1043	8.32667e-17	2.88075	3.30288	8.36567	449.205	8.32667e-17	8.32667e-17	8.32667e-17	3.05786	540.53	1713.53
166085	14.998	8.32667e-17	8.32667e-17	3.30288	6.97653	357.518	8.32667e-17	8.32667e-17	8.32667e-17	6.07552	473.867	1713.53
163081	19.3544	8.32667e-17	8.32667e-17	1.67616	1.42063	342.619	8.32667e-17	1.80339	8.32667e-17	8.32667e-17	403.657	1712.36
168585	23.4351	8.32667e-17	1.45761	8.32667e-17	2.80941	252.991	8.32667e-17	3.54902	8.32667e-17	3.05786	481.151	1711.19
177499	23.0912	8.32667e-17	8.32667e-17	4.92996	6.97653	333.859	8.32667e-17	1.80339	8.32667e-17	3.05786	516.874	1707.69
164446	31.7328	8.32667e-17	8.32667e-17	8.32667e-17	6.97653	487.624	8.32667e-17	8.32667e-17	2.96278	7.58448	535.331	1706.52
163329	16.1904	8.32667e-17	2.88075	8.32667e-17	4.19837	328.527	8.32667e-17	8.32667e-17	5.88868	6.07552	507.39	1705.35
159684	21.2573	8.32667e-17	1.45761	8.32667e-17	4.19837	555.084	8.32667e-17	8.32667e-17	1.50011	4.56662	497.856	1705.35
165423	49.7924	8.32667e-17	8.32667e-17	8.32667e-17	23.6465	426.938	8.32667e-17	1.80339	4.42566	18.1477	613.303	1705.35
36489	5.52275	8.32667e-17	8.32667e-17	1.67616	8.36567	446.722	8.32667e-17	1.80339	1.50011	9.09348	585.06	1705.35
155010	16.305	8.32667e-17	2.88075	8.32667e-17	5.58742	511.592	8.32667e-17	1.80339	8.32667e-17	4.56662	561.092	1704.18
116168	16.2592	8.32667e-17	8.32667e-17	1.67616	11.144	422.767	8.32667e-17	8.32667e-17	2.96278	10.6025	557.928	1704.18
172486	53.4591	8.32667e-17	8.32667e-17	8.32667e-17	4.19837	291.325	8.32667e-17	8.32667e-17	1.50011	1.54936	472.033	1704.18
56772	41.3588	8.32667e-17	8.32667e-17	3.30288	5.58742	248.566	8.32667e-17	8.32667e-17	1.50011	10.6025	375.955	1704.18
164175	38.3335	0.0353364	8.32667e-17	3.30288	9.75482	712.826	1.25767	8.32667e-17	2.96278	7.58448	836.141	1701.84
165283	1213.22	8.32667e-17	15.6924	3.30288	52.8189	535.423	8.32667e-17	8.32667e-17	7.35175	73.9809	551.754	1699.5
169437	21.6012	8.32667e-17	8.32667e-17	8.32667e-17	8.36567	259.463	8.32667e-17	3.54902	8.32667e-17	3.05786	444.792	1695.99
91994	35.0561	8.32667e-17	4.30408	8.32667e-17	11.144	369.674	8.32667e-17	8.32667e-17	4.42566	9.09348	531.961	1694.82
29940	61.6173	8.32667e-17	8.32667e-17	3.30288	8.36567	664.719	8.32667e-17	3.54902	2.96278	3.05786	723.799	1694.82
36675	29.3032	8.32667e-17	8.32667e-17	6.55721	4.19837	501.031	8.32667e-17	8.32667e-17	1.50011	6.07552	573.191	1693.65
164806	45.6444	8.32667e-17	5.72753	1.67616	5.58742	393.398	8.32667e-17	8.32667e-17	4.42566	4.56662	502.426	1692.48
165023	26.5068	8.32667e-17	2.88075	1.67616	11.144	375.018	8.32667e-17	8.32667e-17	4.42566	6.07552	544.141	1692.48
166136	1421.28	8.32667e-17	8.57457	3.30288	15.3115	373.945	8.32667e-17	8.32667e-17	5.88868	46.819	618.386	1691.31
162245	32.4433	8.32667e-17	1.45761	8.32667e-17	6.97653	462.398	8.32667e-17	8.32667e-17	8.32667e-17	4.56662	525.755	1690.14
166899	19.7442	0.0353364	8.32667e-17	8.32667e-17	13.9223	556.745	1.25767	8.32667e-17	8.32667e-17	10.6025	577.497	1690.14
136200	37.3022	8.32667e-17	8.32667e-17	1.67616	4.19837	325.847	8.32667e-17	8.32667e-17	1.50011	3.05786	499.276	1685.46
103138	50.7549	8.32667e-17	8.32667e-17	1.67616	18.0898	340.282	8.32667e-17	8.32667e-17	5.88868	9.09348	468.354	1685.46
138593	68.6982	1.22207	1.45761	1.67616	9.75482	579.46	0.0405159	8.32667e-17	8.32667e-17	3.05786	622.153	1684.29
165800	35.4458	8.32667e-17	8.32667e-17	1.67616	18.0898	600.524	8.32667e-17	8.32667e-17	2.96278	10.6025	579.03	1683.12
165218	86.6867	8.32667e-17	2.88075	3.30288	13.9223	376.045	8.32667e-17	3.54902	5.88868	10.6025	471.291	1681.95
94080	69.2941	0.0353364	1.45761	4.92996	30.5923	493.081	1.25767	1.80339	10.278	9.09348	574.502	1681.95
166914	81.7371	8.32667e-17	8.32667e-17	1.67616	15.3115	405.54	8.32667e-17	8.32667e-17	1.50011	9.09348	557.827	1680.78
166284	11.4432	8.32667e-17	8.32667e-17	3.30288	5.58742	232.76	8.32667e-17	8.32667e-17	8.32667e-17	4.56662	386.582	1680.78
165581	11.9478	8.32667e-17	8.32667e-17	1.67616	4.19837	461.44	8.32667e-17	8.32667e-17	8.32667e-17	1.54936	624.295	1679.61
176023	13.7826	8.32667e-17	2.88075	1.67616	8.36567	358.854	8.32667e-17	8.32667e-17	4.42566	16.6386	476.574	1678.44
165698	18.3227	8.32667e-17	1.45761	3.30288	6.97653	360.601	8.32667e-17	8.32667e-17	4.42566	4.56662	588.594	1678.44
88996	65.4442	8.32667e-17	1.45761	1.67616	16.7007	459.673	8.32667e-17	1.80339	1.50011	6.07552	508.199	1678.44
18242	41.2442	8.32667e-17	8.32667e-17	1.67616	8.36567	381.744	8.32667e-17	8.32667e-17	2.96278	7.58448	572.53	1678.44
115992	38.7232	8.32667e-17	2.88075	1.67616	9.75482	494.016	8.32667e-17	8.32667e-17	5.88868	15.1296	481.389	1677.27
164024	82.2412	8.32667e-17	2.88075	1.67616	25.0357	333.963	8.32667e-17	8.32667e-17	5.88868	19.6567	545.214	1673.77
167633	29.1427	8.32667e-17	1.45761	1.67616	9.75482	445.606	8.32667e-17	8.32667e-17	1.50011	1.54936	647.168	1673.77
169332	55.0174	8.32667e-17	1.45761	1.67616	8.32667e-17	385.863	8.32667e-17	8.32667e-17	2.96278	6.07552	615.76	1672.6
119457	37.646	8.32667e-17	1.45761	8.32667e-17	8.36567	605.898	8.32667e-17	3.54902	2.96278	16.6386	596.605	1671.43
119569	17.7266	8.32667e-17	8.32667e-17	1.67616	8.36567	392.172	8.32667e-17	8.32667e-17	1.50011	4.56662	526.705	1671.43
90705	20.7759	8.32667e-17	1.45761	8.32667e-17	9.75482	412.14	8.32667e-17	8.32667e-17	2.96278	3.05786	551.118	1670.26
142284	37.646	8.32667e-17	1.45761	3.30288	18.0898	389.332	8.32667e-17	8.32667e-17	2.96278	19.6567	480.817	1670.26
90340	32.512	8.32667e-17	8.32667e-17	3.30288	19.479	478.69	8.32667e-17	8.32667e-17	1.50011	13.6206	628.436	1670.26
164985	34.3456	8.32667e-17	1.45761	3.30288	20.8682	544.611	8.32667e-17	1.80339	5.88868	34.7469	528.85	1669.09
20260	14.7916	8.32667e-17	8.32667e-17	1.67616	9.75482	414.674	8.32667e-17	8.32667e-17	8.32667e-17	3.05786	521.443	1669.09
101437	28.8677	8.32667e-17	8.32667e-17	8.32667e-17	16.7007	498.485	8.32667e-17	8.32667e-17	2.96278	27.2018	601.53	1665.58
148111	44.3381	8.32667e-17	2.88075	8.32667e-17	25.0357	514.222	8.32667e-17	1.80339	4.42566	15.1296	555.705	1664.41
163604	46.8132	8.32667e-17	8.32667e-17	3.30288	18.0898	440.071	8.32667e-17	3.54902	7.35175	13.6206	578.274	1664.41
167966	23.9394	0.0353364	8.32667e-17	1.67616	6.97653	459.748	1.25767	8.32667e-17	1.50011	8.32667e-17	525.741	1664.41
162808	45.8048	8.32667e-17	8.32667e-17	4.92996	11.144	437.055	8.32667e-17	8.32667e-17	4.42566	6.07552	487.84	1663.24
149486	1974.78	8.32667e-17	19.9631	1.67616	1.42063	289.234	8.32667e-17	8.32667e-17	8.32667e-17	24.1838	646.158	1662.07
184142	43.4443	8.32667e-17	8.32667e-17	8.32667e-17	13.9223	334.975	8.32667e-17	8.32667e-17	5.88868	4.56662	465.619	1662.07
175025	37.7606	8.32667e-17	8.32667e-17	1.67616	15.3115	485.264	8.32667e-17	8.32667e-17	8.81486	19.6567	612.266	1660.9
88923	95.1652	1.22207	8.32667e-17	4.92996	13.9223	495.852	0.0405159	8.32667e-17	4.42566	19.6567	606.918	1659.73
87231	26.3921	8.32667e-17	8.32667e-17	1.67616	9.75482	444.768	8.32667e-17	8.32667e-17	1.50011	13.6206	437.979	1659.73
20645	1.11206	8.32667e-17	8.32667e-17	8.32667e-17	8.32667e-17	455.571	8.32667e-17	8.32667e-17	1.50011	1.54936	479.846	1657.39
180476	11.3285	8.32667e-17	8.32667e-17	8.32667e-17	12.5331	326.766	8.32667e-17	8.32667e-17	1.50011	4.56662	408.935	1657.39
98875	6.39518	8.32667e-17	8.32667e-17	8.32667e-17	11.144	196.973	8.32667e-17	8.32667e-17	1.50011	6.07552	361.958	1657.39
143304	8.30014	8.32667e-17	8.32667e-17	8.32667e-17	5.58742	356.194	8.32667e-17	8.32667e-17	1.50011	3.05786	473.859	1656.22
168024	21.4407	8.32667e-17	8.32667e-17	4.92996	16.7007	605.042	8.32667e-17	8.32667e-17	8.32667e-17	15.1296	737.078	1655.05
44147	25.5211	8.32667e-17	2.88075	8.32667e-17	9.75482	600.89	8.32667e-17	8.32667e-17	8.32667e-17	8.32667e-17	681.67	1650.37
165257	43.1005	8.32667e-17	2.88075	1.67616	5.58742	359.992	8.32667e-17	8.32667e-17	8.32667e-17	3.05786	436.126	1650.37
167475	32.6037	8.32667e-17	8.32667e-17	3.30288	5.58742	367.855	8.32667e-17	8.32667e-17	1.50011	4.56662	420	1650.37
166782	53.5049	8.32667e-17	8.32667e-17	8.32667e-17	25.0357	508.881	8.32667e-17	1.80339	10.278	12.1115	546.232	1648.03
162349	46.1715	8.32667e-17	8.32667e-17	1.67616	19.479	407.999	8.32667e-17	8.32667e-17	1.50011	12.1115	509.26	1648.03
159479	38.6086	8.32667e-17	1.45761	6.55721	13.9223	515.259	8.32667e-17	3.54902	2.96278	3.05786	488.235	1645.69
19418	22.4035	8.32667e-17	8.32667e-17	1.67616	5.58742	398.691	8.32667e-17	8.32667e-17	4.42566	15.1296	501.109	1645.69
167376	23.1371	8.32667e-17	8.32667e-17	1.67616	5.58742	360.189	8.32667e-17	8.32667e-17	4.42566	4.56662	479.281	1645.69
163737	34.6436	8.32667e-17	2.88075	4.92996	13.9223	499.399	8.32667e-17	8.32667e-17	1.50011	6.07552	498.954	1644.52
92557	46.3319	8.32667e-17	1.45761	1.67616	16.7007	376.021	8.32667e-17	8.32667e-17	4.42566	15.1296	465.896	1643.36
118410	10.5027	8.32667e-17	1.45761	1.67616	8.36567	485.824	8.32667e-17	8.32667e-17	2.96278	10.6025	432.793	1643.36
164210	10.2274	8.32667e-17	8.32667e-17	1.67616	16.7007	308.574	8.32667e-17	8.32667e-17	7.35175	9.09348	482.959	1643.36
92213	0.928966	8.32667e-17	8.32667e-17	8.32667e-17	5.58742	246.146	8.32667e-17	8.32667e-17	8.32667e-17	8.32667e-17	423.099	1643.36
180857	40.7858	8.32667e-17	1.45761	8.32667e-17	5.58742	419.99	8.32667e-17	8.32667e-17	7.35175	9.09348	525.522	1637.51
164121	31.9849	8.32667e-17	8.32667e-17	4.92996	16.7007	447.675	8.32667e-17	8.32667e-17	11.7411	24.1838	491.945	1637.51
162216	52.7257	8.32667e-17	1.45761	8.32667e-17	1.42063	252.33	8.32667e-17	8.32667e-17	1.50011	7.58448	339.629	1636.34
178758	28.8448	0.0353364	8.32667e-17	1.67616	12.5331	470.323	1.25767	8.32667e-17	7.35175	18.1477	519.049	1635.17
167025	46.011	8.32667e-17	8.32667e-17	8.32667e-17	6.97653	679.863	8.32667e-17	8.32667e-17	1.50011	9.09348	927.952	1634
122427	38.8377	8.32667e-17	1.45761	1.67616	8.36567	277.958	8.32667e-17	8.32667e-17	2.96278	9.09348	439.558	1632.83
102572	7.49693	8.32667e-17	8.32667e-17	1.67616	5.58742	318.988	8.32667e-17	1.80339	2.96278	4.56662	442.579	1631.66
162065	24.7188	8.32667e-17	8.32667e-17	1.67616	1.42063	308.364	8.32667e-17	8.32667e-17	4.42566	7.58448	434.409	1630.49
155705	38.5856	8.32667e-17	2.88075	3.30288	9.75482	396.098	8.32667e-17	8.32667e-17	2.96278	4.56662	514.585	1628.15
162401	61.6631	8.32667e-17	2.88075	3.30288	8.32667e-17	452.57	8.32667e-17	8.32667e-17	1.50011	16.6386	409.706	1628.15
130872	8.1854	8.32667e-17	1.45761	1.67616	2.80941	366.651	8.32667e-17	8.32667e-17	8.32667e-17	8.32667e-17	444.26	1628.15
135556	11.145	8.32667e-17	8.32667e-17	8.32667e-17	9.75482	455.749	8.32667e-17	8.32667e-17	7.35175	4.56662	520.323	1626.98
33786	29.3719	8.32667e-17	8.32667e-17	1.67616	19.479	462.122	8.32667e-17	8.32667e-17	4.42566	24.1838	463.694	1626.98
95910	12.7047	8.32667e-17	8.32667e-17	3.30288	9.75482	392.028	8.32667e-17	1.80339	5.88868	7.58448	491.625	1625.81
162394	24.2833	8.32667e-17	1.45761	8.32667e-17	9.75482	546.221	8.32667e-17	8.32667e-17	4.42566	19.6567	600.403	1624.64
136414	6.32631	1.22207	5.72753	125.353	644.593	1877.87	0.0405159	10.5341	387.758	941.642	1164.4	1623.47
103266	16.6948	8.32667e-17	8.32667e-17	8.32667e-17	2.80941	329.72	8.32667e-17	8.32667e-17	8.32667e-17	6.07552	475.023	1623.47
183126	14.6769	8.32667e-17	1.45761	3.30288	6.97653	368.057	8.32667e-17	8.32667e-17	1.50011	12.1115	461.799	1622.3
26080	37.4855	8.32667e-17	8.32667e-17	8.32667e-17	9.75482	445.416	8.32667e-17	8.32667e-17	2.96278	3.05786	590.454	1622.3
166381	13.0946	8.32667e-17	4.30408	8.32667e-17	8.36567	580.196	8.32667e-17	8.32667e-17	1.50011	6.07552	479.069	1621.13
162600	45.9423	8.32667e-17	2.88075	8.32667e-17	1.42063	408.113	8.32667e-17	8.32667e-17	8.32667e-17	8.32667e-17	537.598	1621.13
127863	14.1036	8.32667e-17	8.32667e-17	8.32667e-17	1.42063	308.49	8.32667e-17	8.32667e-17	2.96278	3.05786	462.726	1619.96
148544	52.5424	0.0353364	1.45761	8.32667e-17	8.36567	499.711	1.25767	8.32667e-17	2.96278	15.1296	574.534	1618.79
20780	38.7232	8.32667e-17	1.45761	4.92996	5.58742	381.874	8.32667e-17	8.32667e-17	5.88868	10.6025	611.684	1617.62
172612	44.2006	8.32667e-17	1.45761	4.92996	9.75482	324.757	8.32667e-17	8.32667e-17	4.42566	1.54936	564.046	1617.62
167167	41.1983	8.32667e-17	1.45761	1.67616	8.36567	368.349	8.32667e-17	8.32667e-17	1.50011	10.6025	531.952	1617.62
19299	4.5812	8.32667e-17	8.32667e-17	1.67616	2.80941	621.493	8.32667e-17	8.32667e-17	8.32667e-17	8.32667e-17	517.015	1616.45
169419	16.8783	0.0353364	8.32667e-17	8.32667e-17	1.42063	353.392	1.25767	8.32667e-17	8.32667e-17	3.05786	440.126	1616.45
103052	18.873	8.32667e-17	8.32667e-17	3.30288	9.75482	357.712	8.32667e-17	8.32667e-17	8.32667e-17	3.05786	521.086	1615.28
163395	73.8313	8.32667e-17	8.32667e-17	4.92996	11.144	402.844	8.32667e-17	8.32667e-17	4.42566	10.6025	545.664	1614.11
35486	15.6859	8.32667e-17	8.32667e-17	4.92996	2.80941	358.763	8.32667e-17	8.32667e-17	1.50011	12.1115	456.343	1614.11
40472	49.357	8.32667e-17	1.45761	1.67616	6.97653	480.618	8.32667e-17	1.80339	2.96278	4.56662	451.648	1612.94
155311	5.08646	8.32667e-17	1.45761	1.67616	2.80941	366.524	8.32667e-17	8.32667e-17	1.50011	3.05786	418.644	1612.94
165908	10.4798	8.32667e-17	8.32667e-17	1.67616	8.36567	422.585	8.32667e-17	1.80339	8.32667e-17	1.54936	512.043	1612.94
141847	28.2947	8.32667e-17	1.45761	3.30288	9.75482	304.609	8.32667e-17	8.32667e-17	8.32667e-17	6.07552	484.277	1610.61
179132	13.5303	8.32667e-17	8.32667e-17	8.32667e-17	13.9223	396.204	8.32667e-17	8.32667e-17	2.96278	19.6567	541.575	1609.44
113937	1.84673	8.32667e-17	8.32667e-17	8.32667e-17	5.58742	225.367	8.32667e-17	8.32667e-17	8.32667e-17	1.54936	529.479	1609.44
91017	42.5963	8.32667e-17	8.32667e-17	1.67616	6.97653	459.596	8.32667e-17	8.32667e-17	4.42566	21.1657	490.659	1609.44
163981	11.2367	8.32667e-17	8.32667e-17	8.32667e-17	6.97653	569.691	8.32667e-17	8.32667e-17	1.50011	21.1657	501.966	1608.27
164340	56.782	0.0353364	2.88075	3.30288	11.144	378.475	1.25767	1.80339	2.96278	16.6386	425.46	1604.76
164300	13.9431	8.32667e-17	1.45761	8.32667e-17	8.36567	414.821	8.32667e-17	8.32667e-17	2.96278	7.58448	559.232	1604.76
46267	10.4568	8.32667e-17	8.32667e-17	1.67616	13.9223	395.863	8.32667e-17	8.32667e-17	1.50011	3.05786	460.625	1604.76
92492	12.934	8.32667e-17	8.32667e-17	8.32667e-17	2.80941	485.933	8.32667e-17	8.32667e-17	1.50011	6.07552	454.372	1604.76
165730	11.0762	8.32667e-17	1.45761	1.67616	8.36567	370.643	8.32667e-17	1.80339	5.88868	10.6025	448.331	1602.42
166981	36.0187	8.32667e-17	8.32667e-17	8.32667e-17	6.97653	424.176	8.32667e-17	8.32667e-17	1.50011	7.58448	580.884	1602.42
146074	17.7037	8.32667e-17	8.32667e-17	1.67616	5.58742	388.198	8.32667e-17	8.32667e-17	2.96278	6.07552	526.681	1602.42
28931	16.947	8.32667e-17	1.45761	3.30288	16.7007	208.319	8.32667e-17	8.32667e-17	2.96278	3.05786	590.084	1601.25
126440	47.6382	8.32667e-17	1.45761	8.32667e-17	11.144	287.26	8.32667e-17	8.32667e-17	1.50011	1.54936	449.073	1600.08
174481	3.04188	8.32667e-17	8.32667e-17	8.32667e-17	6.97653	299.768	8.32667e-17	8.32667e-17	8.32667e-17	3.05786	621.924	1600.08
44337	9.95212	8.32667e-17	8.32667e-17	8.32667e-17	6.97653	354.766	8.32667e-17	8.32667e-17	1.50011	1.54936	450.923	1600.08
167140	6.23449	1.22207	1.45761	8.32667e-17	18.0898	493.076	0.0405159	8.32667e-17	1.50011	7.58448	573.152	1598.91
165491	25.2231	8.32667e-17	8.32667e-17	8.32667e-17	2.80941	264.825	8.32667e-17	1.80339	2.96278	1.54936	462.371	1598.91
137180	37.7376	8.32667e-17	2.88075	8.32667e-17	16.7007	320.249	8.32667e-17	8.32667e-17	2.96278	7.58448	429.106	1597.74
169517	9.92917	8.32667e-17	1.45761	1.67616	5.58742	180.081	8.32667e-17	8.32667e-17	8.32667e-17	1.54936	429.158	1596.57
45648	61.0902	1.22207	5.72753	3.30288	12.5331	510.25	0.0405159	1.80339	1.50011	7.58448	557.036	1595.4
169046	5.98195	8.32667e-17	1.45761	8.32667e-17	8.36567	282.224	8.32667e-17	8.32667e-17	8.32667e-17	8.32667e-17	515.132	1595.4
163668	44.1547	8.32667e-17	1.45761	8.32667e-17	8.36567	312.567	8.32667e-17	8.32667e-17	8.32667e-17	7.58448	488.385	1594.23
151004	7.51988	8.32667e-17	8.32667e-17	1.67616	2.80941	456.742	8.32667e-17	8.32667e-17	8.32667e-17	4.56662	447.482	1594.23
137335	30.2429	8.32667e-17	4.30408	1.67616	5.58742	347.963	8.32667e-17	1.80339	8.81486	15.1296	413.128	1593.06
106533	42.2526	0.0353364	1.45761	1.67616	8.36567	634.911	1.25767	8.32667e-17	2.96278	7.58448	552.161	1591.89
43562	14.5394	8.32667e-17	1.45761	1.67616	5.58742	413.332	8.32667e-17	8.32667e-17	8.32667e-17	3.05786	517.387	1591.89
164919	62.9464	8.32667e-17	1.45761	8.32667e-17	12.5331	379.931	8.32667e-17	8.32667e-17	5.88868	13.6206	452.435	1591.89
107579	25.3377	8.32667e-17	8.32667e-17	8.32667e-17	8.36567	347.168	8.32667e-17	1.80339	5.88868	7.58448	534.51	1591.89
166622	34.0935	8.32667e-17	8.32667e-17	8.32667e-17	9.75482	667.703	8.32667e-17	8.32667e-17	5.88868	19.6567	840.033	1590.72
163847	27.6987	8.32667e-17	8.32667e-17	1.67616	6.97653	340.417	8.32667e-17	8.32667e-17	2.96278	3.05786	500.729	1590.72
135085	30.2888	8.32667e-17	8.32667e-17	8.32667e-17	2.80941	247.383	8.32667e-17	8.32667e-17	2.96278	1.54936	404.24	1589.55
107882	53.5736	8.32667e-17	1.45761	1.67616	9.75482	428.264	8.32667e-17	8.32667e-17	2.96278	10.6025	613.311	1588.38
163277	34.5519	8.32667e-17	8.32667e-17	8.32667e-17	20.8682	368.187	8.32667e-17	1.80339	1.50011	24.1838	491.474	1588.38
19753	0.177248	8.32667e-17	8.32667e-17	3.30288	8.32667e-17	146.742	8.32667e-17	8.32667e-17	8.32667e-17	1.54936	346.519	1588.38
24801	3.40956	8.32667e-17	1.45761	3.30288	52.8189	953.529	8.32667e-17	5.2951	2.96278	40.783	966.658	1587.21
146533	88.7033	8.32667e-17	1.45761	8.32667e-17	8.36567	342.626	8.32667e-17	8.32667e-17	8.32667e-17	4.56662	405.005	1587.21
166681	8.57549	8.32667e-17	8.32667e-17	1.67616	22.2573	535.973	8.32667e-17	8.32667e-17	5.88868	12.1115	391.217	1587.21
124899	14.9292	8.32667e-17	8.32667e-17	8.32667e-17	2.80941	378.855	8.32667e-17	8.32667e-17	1.50011	6.07552	509.081	1586.04
168386	46.4465	8.32667e-17	2.88075	6.55721	12.5331	453.265	8.32667e-17	1.80339	2.96278	10.6025	562.147	1583.7
147155	25.9795	8.32667e-17	1.45761	1.67616	11.144	331.009	8.32667e-17	8.32667e-17	8.32667e-17	10.6025	466.94	1583.7
166418	203.664	8.32667e-17	4.30408	6.55721	30.5923	752.122	8.32667e-17	5.2951	8.81486	37.7649	661.953	1581.36
165972	33.7726	8.32667e-17	1.45761	8.32667e-17	26.4248	475.303	8.32667e-17	8.32667e-17	2.96278	27.2018	448.925	1581.36
42647	3.52445	8.32667e-17	8.32667e-17	8.32667e-17	8.32667e-17	369.325	8.32667e-17	8.32667e-17	8.32667e-17	3.05786	449.671	1580.19
156439	27.6758	8.32667e-17	1.45761	8.32667e-17	16.7007	478.446	8.32667e-17	8.32667e-17	2.96278	9.09348	560.929	1577.86
165414	22.1055	8.32667e-17	1.45761	3.30288	12.5331	519.477	8.32667e-17	8.32667e-17	1.50011	21.1657	543.582	1577.86
166322	40.3045	8.32667e-17	8.32667e-17	8.32667e-17	4.19837	430.713	8.32667e-17	8.32667e-17	1.50011	15.1296	556.624	1577.86
33378	9.67681	8.32667e-17	1.45761	8.32667e-17	19.479	553.531	8.32667e-17	8.32667e-17	1.50011	30.2199	450.629	1575.52
176963	52.1299	8.32667e-17	1.45761	8.32667e-17	12.5331	433.23	8.32667e-17	8.32667e-17	4.42566	13.6206	522.898	1574.35
119314	48.9445	2.41648	1.45761	1.67616	12.5331	375.894	0.0795823	8.32667e-17	8.32667e-17	9.09348	438.926	1574.35
170355	24.1228	8.32667e-17	2.88075	1.67616	4.19837	400.609	8.32667e-17	8.32667e-17	8.32667e-17	1.54936	358.214	1573.18
19496	50.1132	8.32667e-17	8.32667e-17	1.67616	1.42063	398.905	8.32667e-17	8.32667e-17	8.32667e-17	15.1296	555.088	1573.18
42006	68.767	8.32667e-17	8.32667e-17	8.32667e-17	11.144	332.581	8.32667e-17	8.32667e-17	8.32667e-17	6.07552	529.009	1573.18
165031	33.383	8.32667e-17	4.30408	3.30288	5.58742	471.791	8.32667e-17	1.80339	8.32667e-17	10.6025	554.146	1570.84
18012	31.8474	8.32667e-17	1.45761	8.32667e-17	5.58742	254	8.32667e-17	8.32667e-17	8.32667e-17	1.54936	405.648	1570.84
102462	38.6315	8.32667e-17	8.32667e-17	3.30288	12.5331	440.256	8.32667e-17	8.32667e-17	4.42566	13.6206	632.283	1570.84
37763	25.6128	8.32667e-17	8.32667e-17	8.32667e-17	5.58742	490.026	8.32667e-17	8.32667e-17	4.42566	6.07552	478.672	1570.84
164506	40.1899	8.32667e-17	2.88075	1.67616	11.144	377.745	8.32667e-17	8.32667e-17	5.88868	10.6025	565.755	1569.67
167654	47.7757	8.32667e-17	1.45761	4.92996	12.5331	299.277	8.32667e-17	8.32667e-17	4.42566	13.6206	474.794	1569.67
164853	15.2502	8.32667e-17	8.32667e-17	1.67616	6.97653	393.625	8.32667e-17	8.32667e-17	8.32667e-17	3.05786	560.455	1569.67
31205	36.1333	0.0694155	8.32667e-17	8.32667e-17	9.75482	344.437	2.4828	8.32667e-17	8.32667e-17	3.05786	512.9	1569.67
162861	20.0422	8.32667e-17	8.32667e-17	8.32667e-17	4.19837	405.064	8.32667e-17	8.32667e-17	1.50011	12.1115	445.847	1569.67
165693	39.5253	8.32667e-17	2.88075	1.67616	5.58742	537.788	8.32667e-17	8.32667e-17	4.42566	12.1115	485.638	1568.5
166443	31.664	8.32667e-17	8.32667e-17	1.67616	8.36567	381.671	8.32667e-17	1.80339	1.50011	3.05786	552.282	1568.5
166921	15.9381	8.32667e-17	8.32667e-17	8.32667e-17	19.479	374.697	8.32667e-17	1.80339	2.96278	16.6386	465.888	1568.5
98956	37.2105	8.32667e-17	8.32667e-17	8.32667e-17	1.42063	283.353	8.32667e-17	1.80339	1.50011	1.54936	463.876	1567.33
132521	39.0898	8.32667e-17	2.88075	3.30288	8.36567	430.381	8.32667e-17	1.80339	4.42566	3.05786	477.012	1566.16
136152	17.4056	8.32667e-17	8.32667e-17	3.30288	6.97653	435.644	8.32667e-17	8.32667e-17	1.50011	7.58448	468.948	1564.99
167519	41.3588	8.32667e-17	8.32667e-17	4.92996	11.144	285.541	8.32667e-17	3.54902	8.81486	3.05786	368.196	1563.82
138316	19.2857	8.32667e-17	1.45761	1.67616	5.58742	378.904	8.32667e-17	8.32667e-17	2.96278	7.58448	521.225	1562.65
26045	20.6842	8.32667e-17	1.45761	1.67616	2.80941	293.983	8.32667e-17	8.32667e-17	1.50011	6.07552	474.752	1561.48
140758	15.2273	8.32667e-17	8.32667e-17	8.32667e-17	9.75482	402.934	8.32667e-17	8.32667e-17	8.32667e-17	3.05786	569.96	1561.48
119998	8.55255	8.32667e-17	8.32667e-17	8.32667e-17	8.32667e-17	106.197	8.32667e-17	8.32667e-17	8.32667e-17	8.32667e-17	487.603	1561.48
114627	4.37448	8.32667e-17	8.32667e-17	8.32667e-17	4.19837	372.12	8.32667e-17	8.32667e-17	8.32667e-17	3.05786	482.057	1561.48
45865	19.9505	8.32667e-17	2.88075	1.67616	11.144	537.986	8.32667e-17	1.80339	1.50011	15.1296	530.17	1560.31
20837	11.5808	8.32667e-17	1.45761	3.30288	9.75482	453.159	8.32667e-17	8.32667e-17	8.32667e-17	7.58448	535.153	1560.31
145684	12.4753	8.32667e-17	1.45761	1.67616	31.9815	835.192	8.32667e-17	8.32667e-17	11.7411	75.4899	514.972	1560.31
168646	32.7871	8.32667e-17	8.32667e-17	1.67616	12.5331	293.648	8.32667e-17	8.32667e-17	1.50011	6.07552	400.596	1559.14
120673	40.5795	8.32667e-17	1.45761	3.30288	19.479	376.322	8.32667e-17	8.32667e-17	7.35175	13.6206	538.751	1557.97
182138	12.5671	8.32667e-17	8.32667e-17	8.32667e-17	8.32667e-17	251.265	8.32667e-17	8.32667e-17	8.32667e-17	8.32667e-17	386.757	1557.97
147312	51.1216	1.22207	1.45761	1.67616	13.9223	443.876	0.0405159	8.32667e-17	7.35175	13.6206	533.753	1556.8
175733	14.5164	8.32667e-17	1.45761	8.32667e-17	18.0898	454.596	8.32667e-17	1.80339	2.96278	9.09348	563.504	1555.63
173649	16.9012	8.32667e-17	8.32667e-17	8.32667e-17	9.75482	426.419	8.32667e-17	8.32667e-17	1.50011	3.05786	479.687	1555.63
107865	6.96904	8.32667e-17	8.32667e-17	8.32667e-17	1.42063	297.609	8.32667e-17	8.32667e-17	8.32667e-17	1.54936	399.28	1555.63
164873	46.8361	8.32667e-17	1.45761	8.32667e-17	11.144	421.125	8.32667e-17	1.80339	1.50011	7.58448	481.006	1554.46
163033	65.9484	8.32667e-17	1.45761	1.67616	8.36567	306.747	8.32667e-17	8.32667e-17	4.42566	1.54936	376.447	1554.46
169072	45.3235	8.32667e-17	8.32667e-17	8.32667e-17	2.80941	380.62	8.32667e-17	8.32667e-17	4.42566	7.58448	634.633	1554.46
134684	1.04335	8.32667e-17	1.45761	8.32667e-17	6.97653	322.162	8.32667e-17	8.32667e-17	8.32667e-17	8.32667e-17	303.857	1550.95
161322	27.8821	1.22207	8.32667e-17	1.67616	9.75482	508.797	0.0405159	8.32667e-17	2.96278	19.6567	525.987	1550.95
54293	90.7427	8.32667e-17	2.88075	8.32667e-17	11.144	293.876	8.32667e-17	8.32667e-17	13.2042	19.6567	449.127	1549.78
134338	41.1754	8.32667e-17	1.45761	3.30288	13.9223	333.591	8.32667e-17	8.32667e-17	2.96278	9.09348	452.124	1549.78
132155	44.7964	8.32667e-17	8.32667e-17	8.32667e-17	12.5331	438.434	8.32667e-17	8.32667e-17	8.32667e-17	24.1838	499.99	1549.78
93952	19.9276	8.32667e-17	8.32667e-17	8.32667e-17	5.58742	391.806	8.32667e-17	1.80339	5.88868	6.07552	443.07	1549.78
168459	40.3733	8.32667e-17	2.88075	8.32667e-17	5.58742	361.502	8.32667e-17	8.32667e-17	1.50011	3.05786	476.592	1548.61
23637	14.7916	1.22207	1.45761	3.30288	15.3115	646.935	0.0405159	1.80339	1.50011	1.54936	572.457	1547.44
152124	15.2044	8.32667e-17	8.32667e-17	1.67616	5.58742	255.45	8.32667e-17	8.32667e-17	8.32667e-17	3.05786	433.969	1547.44
34283	84.6702	8.32667e-17	4.30408	4.92996	9.75482	377.547	8.32667e-17	8.32667e-17	5.88868	9.09348	513.12	1546.28
169176	28.6614	8.32667e-17	8.32667e-17	1.67616	6.97653	280.628	8.32667e-17	1.80339	1.50011	12.1115	444.973	1546.28
25600	24.6271	1.22207	8.32667e-17	8.32667e-17	6.97653	271.327	0.0405159	8.32667e-17	8.32667e-17	3.05786	435.457	1546.28
22798	0.0114568	8.32667e-17	8.32667e-17	8.32667e-17	8.32667e-17	174.696	8.32667e-17	8.32667e-17	8.32667e-17	1.54936	402.128	1546.28
129703	38.8377	8.32667e-17	1.45761	6.55721	1.42063	466.484	8.32667e-17	8.32667e-17	2.96278	3.05786	552.769	1543.94
165956	55.2695	8.32667e-17	1.45761	8.32667e-17	9.75482	352.009	8.32667e-17	8.32667e-17	1.50011	6.07552	427.983	1542.77
90196	23.3663	0.0353364	8.32667e-17	8.32667e-17	13.9223	264.725	1.25767	8.32667e-17	2.96278	8.32667e-17	438.096	1542.77
163694	42.7797	8.32667e-17	1.45761	8.32667e-17	2.80941	213.129	8.32667e-17	8.32667e-17	8.32667e-17	6.07552	430.866	1541.6
89018	21.7846	8.32667e-17	1.45761	3.30288	5.58742	480.091	8.32667e-17	8.32667e-17	8.32667e-17	7.58448	651.402	1540.43
166402	57.9049	8.32667e-17	1.45761	4.92996	18.0898	457.542	8.32667e-17	8.32667e-17	2.96278	6.07552	648.583	1540.43
154284	32.81	8.32667e-17	8.32667e-17	3.30288	8.36567	488.87	8.32667e-17	3.54902	8.32667e-17	7.58448	516.444	1538.09
166515	61.6631	8.32667e-17	8.32667e-17	1.67616	25.0357	429	8.32667e-17	3.54902	5.88868	15.1296	464.865	1538.09
115376	1.27256	8.32667e-17	8.32667e-17	8.32667e-17	2.80941	127.181	8.32667e-17	8.32667e-17	8.32667e-17	3.05786	413.651	1538.09
20041	53.8716	8.32667e-17	8.32667e-17	8.32667e-17	11.144	316.131	8.32667e-17	8.32667e-17	1.50011	3.05786	399.423	1538.09
163927	25.2919	8.32667e-17	1.45761	4.92996	12.5331	428.026	8.32667e-17	8.32667e-17	8.32667e-17	21.1657	547.161	1536.92
147240	9.69975	0.0353364	1.45761	1.67616	1.42063	230.465	1.25767	8.32667e-17	1.50011	3.05786	470.151	1536.92
167126	60.2194	0.0353364	8.32667e-17	1.67616	5.58742	389.441	1.25767	1.80339	8.32667e-17	1.54936	506.449	1536.92
135693	54.0091	8.32667e-17	4.30408	4.92996	11.144	404.002	8.32667e-17	8.32667e-17	8.32667e-17	3.05786	503.839	1535.75
42531	1.38731	8.32667e-17	8.32667e-17	8.32667e-17	8.32667e-17	433.675	8.32667e-17	8.32667e-17	8.32667e-17	8.32667e-17	647.102	1535.75
169087	77.6582	8.32667e-17	2.88075	8.32667e-17	8.36567	394.843	8.32667e-17	8.32667e-17	5.88868	13.6206	532.12	1534.58
125197	14.9292	8.32667e-17	8.32667e-17	8.32667e-17	12.5331	346.816	8.32667e-17	8.32667e-17	2.96278	10.6025	449.52	1534.58
163728	1.61696	8.32667e-17	1.45761	1.67616	23.6465	524.19	8.32667e-17	8.32667e-17	8.32667e-17	15.1296	418.135	1533.41
160234	34.9874	8.32667e-17	8.32667e-17	1.67616	16.7007	447.734	8.32667e-17	8.32667e-17	1.50011	10.6025	505.437	1533.41
162833	42.0692	8.32667e-17	8.32667e-17	8.32667e-17	9.75482	444.907	8.32667e-17	8.32667e-17	5.88868	19.6567	466.301	1531.07
146490	0.883278	8.32667e-17	8.32667e-17	8.32667e-17	8.32667e-17	169.11	8.32667e-17	8.32667e-17	8.32667e-17	8.32667e-17	333.347	1531.07
111360	8.50666	8.32667e-17	8.32667e-17	8.32667e-17	8.32667e-17	141.656	8.32667e-17	8.32667e-17	1.50011	8.32667e-17	396.316	1528.73
167805	32.0766	8.32667e-17	8.32667e-17	8.32667e-17	6.97653	497.733	8.32667e-17	8.32667e-17	1.50011	6.07552	428.804	1527.56
167574	40.717	8.32667e-17	8.32667e-17	8.32667e-17	11.144	369.811	8.32667e-17	8.32667e-17	8.32667e-17	9.09348	569.754	1526.39
143720	47.4548	8.32667e-17	8.32667e-17	3.30288	9.75482	315.386	8.32667e-17	8.32667e-17	2.96278	9.09348	534.283	1526.39
120912	6.85428	8.32667e-17	8.32667e-17	8.32667e-17	9.75482	266.196	8.32667e-17	8.32667e-17	8.32667e-17	13.6206	474.522	1525.22
39967	97.6171	8.32667e-17	1.45761	8.32667e-17	1.42063	328.116	8.32667e-17	8.32667e-17	8.32667e-17	8.32667e-17	414.336	1522.88
162017	43.1922	8.32667e-17	8.32667e-17	3.30288	6.97653	445.054	8.32667e-17	8.32667e-17	11.7411	3.05786	498.677	1522.88
150569	5.13239	8.32667e-17	8.32667e-17	1.67616	6.97653	346.51	8.32667e-17	1.80339	8.32667e-17	8.32667e-17	388.861	1522.88
111519	57.6757	1.22207	2.88075	1.67616	20.8682	600.868	0.0405159	8.32667e-17	4.42566	16.6386	674.916	1520.54
164692	59.5319	8.32667e-17	8.32667e-17	8.32667e-17	11.144	351.279	8.32667e-17	1.80339	8.32667e-17	7.58448	573.681	1519.37
164447	46.1944	1.22207	8.32667e-17	8.32667e-17	11.144	420.012	0.0405159	8.32667e-17	1.50011	19.6567	530.92	1519.37
117664	27.2861	8.32667e-17	1.45761	8.32667e-17	4.19837	356.127	8.32667e-17	8.32667e-17	7.35175	12.1115	459.023	1518.2
104988	1.29551	8.32667e-17	8.32667e-17	3.30288	8.32667e-17	347.719	8.32667e-17	8.32667e-17	8.32667e-17	1.54936	368.66	1517.03
165728	38.7232	8.32667e-17	2.88075	8.32667e-17	12.5331	412.978	8.32667e-17	1.80339	2.96278	12.1115	439.151	1514.7
180799	7.95592	8.32667e-17	8.32667e-17	8.32667e-17	1.42063	326.064	8.32667e-17	8.32667e-17	8.32667e-17	1.54936	558.656	1514.7
[truncated: 8,309 more rows]
