# Supplementary material for: Time-Course RNAseq Reveals Exserohilum turcicum Effectors and Pathogenicity Determinants
Source: Front Microbiol. 2020 Mar 20;11:360. doi: 10.3389/fmicb.2020.00360 (PMC7099616; doi:10.3389/fmicb.2020.00360)
Supplement: Supplementary file 4 [file Table_4.XLSX]

## Sheet: Sheet1
Supplementary Table 4 Classification and interproscan domain descriptions of peptidases identified from the Exserohilum turcicum reference genome. Read count values are shown for each time point.
Protein ID	Classification	InterProScan domain description						Protein ID	13N_in vitro	13N_0dpi	13N_2dpi	13N_5dpi	13N_7dpi	13N_13dpi	23N_0dpi	23N_2dpi	23N_5dpi	23N_7dpi	23N_13dpi	23N_SL
162922	Metallo	Peptidase M28	Protease-associated PA					162922	23.6414	8.32667e-17	7.15104	6.55721	25.0357	2899.83	8.32667e-17	3.54902	8.32667e-17	1.54936	4084.07	20393.8
162469	Metallo	Peptidase M14, carboxypeptidase A						162469	25.0856	1.22207	4.30408	1.67616	18.0898	3422.23	0.0405159	1.80339	1.50011	1.54936	3195.74	16323.5
168833	Cysteine	Cysteine peptidase PfpI						168833	26.4838	8.32667e-17	4.30408	3.30288	33.3707	3184.75	8.32667e-17	1.80339	7.35175	34.7469	4358.01	14602.9
163614	Serine	Peptidase S8 and S53, subtilisin, kexin, sedolisin	Proteinase inhibitor I9, subtilisin propeptide	Proteinase inhibitor, propeptide				163614	735.768	1.22207	9.99812	14.6941	65.3213	3306.86	0.0405159	8.78774	26.3725	86.0529	3794.47	12551.4
163750	Aspartyl	Peptidase A1	Peptidase aspartic, active site	Peptidase aspartic, catalytic				163750	272.085	0.0694155	2.88075	14.6941	52.8189	2820.91	2.4828	8.32667e-17	20.5199	43.801	3383.56	10604
93425	Serine	Peptidase S1A, chymotrypsin	Peptidase S1 and S6, chymotrypsin/Hap	Peptidase, trypsin-like serine and cysteine				93425	33.5664	8.32667e-17	2.88075	3.30288	66.7104	2877.27	8.32667e-17	8.32667e-17	1.50011	7.58448	2350.07	9041.31
154467	Metallo	Peptidase M24, catalytic core	Zinc finger, PHD-type	Endonuclease/exonuclease/phosphatase	Zinc finger, FYVE/PHD-type			154467	115.972	0.0353364	2.88075	4.92996	47.2623	2333.85	1.25767	3.54902	19.0568	46.819	3255.73	8755.92
86594	Metallo	Peptidase M16, N-terminal	Peptidase M16, C-terminal	Peptidase M16, zinc-binding site	Metalloenzyme, LuxS/M16 peptidase-like, metal-binding			86594	99.7711	8.32667e-17	7.15104	3.30288	38.9273	2067.38	8.32667e-17	1.80339	13.2042	42.292	2700.03	8436.61
124966	Metallo	Peptidase M28	Transferrin receptor-like, dimerisation	Protease-associated PA				124966	8.23129	8.32667e-17	1.45761	1.67616	9.75482	1703.87	8.32667e-17	8.32667e-17	8.32667e-17	3.05786	1277.86	6478.64
168308	Metallo	Peptidase M16, N-terminal	Peptidase M16, C-terminal	Metalloenzyme, LuxS/M16 peptidase-like, metal-binding				168308	74.4042	8.32667e-17	2.88075	4.92996	45.8731	1575.95	8.32667e-17	8.32667e-17	10.278	28.7108	2024.91	5913.7
162786	Serine	Peptidase S28						162786	38.196	8.32667e-17	8.32667e-17	1.67616	23.6465	1615.67	8.32667e-17	8.32667e-17	8.32667e-17	1.54936	1873.32	5799.08
102904	Metallo	Peptidase M20	Peptidase M20, dimerisation	Glutathione degradosome, DUG1	ArgE/DapE/ACY1/CPG2/YscS, conserved site			102904	159.669	0.0353364	2.88075	3.30288	18.0898	1096.86	1.25767	1.80339	10.278	13.6206	1625.95	5594.39
161117	Metallo	Peptidase M28	Cystinosin/ERS1p repeat	Protease-associated PA				161117	29.2573	8.32667e-17	4.30408	1.67616	4.19837	635.155	8.32667e-17	8.32667e-17	8.32667e-17	8.32667e-17	1152.3	5541.76
164048	Serine	Peptidase S10, serine carboxypeptidase						164048	319.196	8.32667e-17	2.88075	8.18453	48.6514	1480.95	8.32667e-17	1.80339	20.5199	67.945	1553.62	4903.14
164365	Cysteine	Peptidase C19, ubiquitin carboxyl-terminal hydrolase 2	MATH	TRAF-like				164365	60.1048	8.32667e-17	2.88075	1.67616	23.6465	1043.08	8.32667e-17	1.80339	2.96278	25.6928	1221.18	3974.44
166448	Metallo	Peptidase M1, membrane alanine aminopeptidase, N-terminal	Peptidase M, neutral zinc metallopeptidases, zinc-binding site					166448	105.133	8.32667e-17	2.88075	3.30288	31.9815	971.365	8.32667e-17	8.32667e-17	4.42566	19.6567	1242.65	3962.75
166850	Cysteine	Peptidase C19, ubiquitin carboxyl-terminal hydrolase 2	Ubiquitin					166850	66.5671	1.22207	4.30408	8.32667e-17	15.3115	710.87	0.0405159	8.32667e-17	8.81486	12.1115	1166.1	3946.37
129226	Metallo	Peptidase M1, membrane alanine aminopeptidase, N-terminal	Peptidase M, neutral zinc metallopeptidases, zinc-binding site					129226	74.3813	8.32667e-17	2.88075	1.67616	8.36567	910.181	8.32667e-17	1.80339	4.42566	7.58448	1204.6	3897.25
166114	Metallo	Peptidase M18, aminopeptidase I						166114	50.5257	8.32667e-17	8.32667e-17	3.30288	9.75482	709.333	8.32667e-17	8.32667e-17	1.50011	16.6386	1051.12	3724.14
88934	Serine	Peptidase S9, prolyl oligopeptidase active site region	Peptidase S9B, dipeptidylpeptidase IV N-terminal	Peptidase S9, serine active site				88934	21.1197	1.22207	8.32667e-17	8.32667e-17	13.9223	647.883	0.0405159	8.32667e-17	8.32667e-17	8.32667e-17	876.457	3659.81
167413	Threonine	Peptidase T1A, proteasome beta-subunit	20S proteasome, A and B subunits					167413	81.3934	1.22207	2.88075	3.30288	12.5331	693.415	0.0405159	1.80339	7.35175	10.6025	1059.18	3413.02
164250	Metallo	Peptidase M24, catalytic core	Peptidase M24B, X-Pro dipeptidase/aminopeptidase P N-terminal	Peptidase, cysteine peptidase active site				164250	75.9854	8.32667e-17	8.32667e-17	3.30288	25.0357	844.298	8.32667e-17	8.32667e-17	5.88868	13.6206	843.32	3386.12
180106	Metallo	Peptidase M3A and M3B, thimet/oligopeptidase F	Peptidase M, neutral zinc metallopeptidases, zinc-binding site					180106	107.402	8.32667e-17	1.45761	1.67616	20.8682	741.402	8.32667e-17	1.80339	11.7411	18.1477	1158.09	3255.12
27640	Serine	Peptidase S10, serine carboxypeptidase						27640	3.91504	2.41648	8.32667e-17	8.32667e-17	23.6465	1176.39	0.0795823	8.32667e-17	8.32667e-17	8.32667e-17	829.235	3110.08
29794	Metallo	Peptidase M28						29794	2.81206	1.22207	8.32667e-17	1.67616	4.19837	494.708	0.0405159	1.80339	8.32667e-17	8.32667e-17	660.93	2917.09
43034	Cysteine	Peptidase C19, ubiquitin carboxyl-terminal hydrolase 2						43034	61.5256	8.32667e-17	2.88075	3.30288	23.6465	609.359	8.32667e-17	1.80339	7.35175	10.6025	862.786	2811.82
128091	Metallo	Peptidase M24, catalytic core	Creatinase	Peptidase M24B, X-Pro dipeptidase/aminopeptidase P, conserved site				128091	91.7509	8.32667e-17	8.32667e-17	3.30288	29.2032	813.905	8.32667e-17	8.32667e-17	4.42566	12.1115	901.361	2801.3
42546	Serine	Peptidase S16, Lon protease	AAA ATPase, core	Peptidase S16, lon N-terminal	Peptidase S16, lon C-terminal	AAA+ ATPase, core	Peptidase S16, ATP-dependent protease La	42546	24.8563	8.32667e-17	8.32667e-17	1.67616	8.36567	500.654	8.32667e-17	1.80339	1.50011	6.07552	912.328	2722.93
169593	Metallo	Peptidase M24, methionine aminopeptidase	Peptidase M24, catalytic core	Peptidase M24A, methionine aminopeptidase, subfamily 2				169593	38.7002	8.32667e-17	1.45761	8.32667e-17	16.7007	593.427	8.32667e-17	1.80339	1.50011	15.1296	860.016	2663.28
139596	Cysteine	Peptidase C19, ubiquitin carboxyl-terminal hydrolase 2						139596	32.3287	8.32667e-17	1.45761	1.67616	2.80941	412.867	8.32667e-17	8.32667e-17	8.32667e-17	7.58448	801.016	2630.53
97994	Metallo	Peptidase M49, dipeptidyl-peptidase III	Peptidase M49, dipeptidyl-peptidase 3, eukaryotic					97994	73.3043	8.32667e-17	2.88075	8.32667e-17	11.144	489.807	8.32667e-17	8.32667e-17	1.50011	7.58448	806.83	2573.22
158659	Metallo	Peptidase M41	Peptidase M41, FtsH extracellular	AAA+ ATPase, core	Peptidase M41, FtsH	AAA ATPase, conserved site	AAA ATPase, core	158659	40.3962	2.41648	8.32667e-17	6.55721	16.7007	665.02	0.0795823	8.32667e-17	5.88868	24.1838	829.21	2562.69
163798	Threonine	Peptidase T1A, proteasome beta-subunit	20S proteasome, A and B subunits	Proteasome, beta-type subunit, conserved site				163798	69.1107	1.22207	1.45761	1.67616	13.9223	590.662	0.0405159	8.32667e-17	1.50011	9.09348	815.399	2456.25
114927	Metallo	Peptidase M36, fungalysin	Propeptide, peptidase M4 and M36	Peptidase M, neutral zinc metallopeptidases, zinc-binding site				114927	16.2133	8.32667e-17	1.45761	8.32667e-17	13.9223	558.981	8.32667e-17	1.80339	8.32667e-17	1.54936	480.331	2257.42
35606	Metallo	Peptidase M48, Ste24p						35606	72.7772	8.32667e-17	4.30408	3.30288	31.9815	695.259	8.32667e-17	1.80339	7.35175	28.7108	727.963	2238.7
24405	Threonine	Peptidase T1A, proteasome beta-subunit	20S proteasome, A and B subunits	Proteasome, beta-type subunit, conserved site				24405	57.6299	8.32667e-17	5.72753	8.32667e-17	11.144	607.692	8.32667e-17	8.32667e-17	1.50011	10.6025	735.738	2218.82
92344	Metallo	Peptidase M18, aminopeptidase I						92344	45.0485	8.32667e-17	1.45761	1.67616	11.144	377.797	8.32667e-17	1.80339	1.50011	3.05786	580.605	2180.22
119377	Metallo	Peptidase M16, N-terminal	Peptidase M16, C-terminal	Metalloenzyme, LuxS/M16 peptidase-like, metal-binding				119377	67.7587	0.0694155	8.32667e-17	8.32667e-17	23.6465	470.656	2.4828	8.32667e-17	2.96278	10.6025	605.44	2149.81
123785	Metallo	Peptidase M24, catalytic core	FACT complex subunit Spt16p/Cdc68p	Region of unknown function DUF1747, eukaryote				123785	44.7277	8.32667e-17	2.88075	8.32667e-17	18.0898	489.26	8.32667e-17	8.32667e-17	8.32667e-17	9.09348	617.687	2107.7
123258	Metallo	Peptidase M20	Peptidase M20, dimerisation	Peptidase M20D, mername-AA028/carboxypeptidase Ss1	Peptidase M20D, amidohydrolase			123258	34.0706	8.32667e-17	8.32667e-17	1.67616	9.75482	572.713	8.32667e-17	8.32667e-17	4.42566	4.56662	591.067	2080.8
167714	Cysteine	Peptidase C19, ubiquitin carboxyl-terminal hydrolase 2						167714	44.6589	8.32667e-17	8.32667e-17	8.32667e-17	4.19837	367.099	8.32667e-17	8.32667e-17	8.32667e-17	3.05786	552.188	2045.71
162968	Serine	Peptidase S9, prolyl oligopeptidase active site region	Immunoglobulin/major histocompatibility complex, conserved site					162968	57.0799	8.32667e-17	1.45761	8.32667e-17	11.144	618.002	8.32667e-17	8.32667e-17	8.32667e-17	6.07552	641.217	2036.35
18577	Serine	Peptidase S59, nucleoporin	Peptidase S59, nucleoporin					18577	78.2769	0.0353364	1.45761	8.32667e-17	16.7007	590.083	1.25767	8.32667e-17	8.32667e-17	19.6567	624.898	1995.42
99451	Serine	Peptidase S53, propeptide	Peptidase S8 and S53, subtilisin, kexin, sedolisin	Proteinase inhibitor, propeptide				99451	37.1418	8.32667e-17	8.32667e-17	3.30288	6.97653	544.019	8.32667e-17	8.32667e-17	2.96278	1.54936	739.518	1949.8
152153	Cysteine	Peptidase C19, ubiquitin carboxyl-terminal hydrolase 2						152153	38.7461	8.32667e-17	8.32667e-17	3.30288	8.36567	426.787	8.32667e-17	8.32667e-17	4.42566	9.09348	570.1	1926.41
177505	Aspartyl	Peptidase A1	Peptidase aspartic, active site	Phosphotransferase system, HPr serine phosphorylation site	Peptidase aspartic, catalytic			177505	17.5203	8.32667e-17	1.45761	1.67616	4.19837	642.933	8.32667e-17	1.80339	8.32667e-17	4.56662	567.042	1919.39
168208	Serine	Peptidase S8 and S53, subtilisin, kexin, sedolisin	Galactose-binding like	Proprotein convertase, P				168208	29.2115	8.32667e-17	8.32667e-17	1.67616	5.58742	329.952	8.32667e-17	8.32667e-17	1.50011	7.58448	534.389	1919.39
139094	Signal	Signal peptidase 22 kDa subunit						139094	67.14	8.32667e-17	8.32667e-17	4.92996	29.2032	520.947	8.32667e-17	1.80339	8.81486	24.1838	580.036	1807.1
175288	Serine	Peptidase S53, propeptide	Peptidase S8 and S53, subtilisin, kexin, sedolisin	Proteinase inhibitor, propeptide				175288	17.7954	1.22207	1.45761	1.67616	12.5331	574.267	0.0405159	8.32667e-17	8.32667e-17	8.32667e-17	654.544	1800.09
24311	Metallo	Peptidase M16, N-terminal	Peptidase M16, C-terminal	Metalloenzyme, LuxS/M16 peptidase-like, metal-binding				24311	44.3381	8.32667e-17	1.45761	3.30288	16.7007	353.785	8.32667e-17	1.80339	2.96278	6.07552	533.205	1770.85
116168	Metallo	Peptidase M16, N-terminal	Peptidase M16, C-terminal	Peptidase M16, zinc-binding site	Metalloenzyme, LuxS/M16 peptidase-like, metal-binding			116168	16.2592	8.32667e-17	8.32667e-17	1.67616	11.144	422.767	8.32667e-17	8.32667e-17	2.96278	10.6025	557.928	1704.18
164340	Metallo	Peptidase M1, membrane alanine aminopeptidase, N-terminal	Peptidase M1, leukotriene A4 hydrolase, aminopeptidase C-terminal	Leukotriene A-4 hydrolase/aminopeptidase	Peptidase M, neutral zinc metallopeptidases, zinc-binding site	Armadillo-type fold		164340	56.782	0.0353364	2.88075	3.30288	11.144	378.475	1.25767	1.80339	2.96278	16.6386	425.46	1604.76
134338	Serine	Peptidase S10, serine carboxypeptidase						134338	41.1754	8.32667e-17	1.45761	3.30288	13.9223	333.591	8.32667e-17	8.32667e-17	2.96278	9.09348	452.124	1549.78
135693	Serine	Peptidase S16, Lon protease	AAA ATPase, core	Peptidase S16, lon N-terminal	Peptidase S16, lon C-terminal	AAA+ ATPase, core	Peptidase S16, ATP-dependent protease La	135693	54.0091	8.32667e-17	4.30408	4.92996	11.144	404.002	8.32667e-17	8.32667e-17	8.32667e-17	3.05786	503.839	1535.75
162833	Metallo	Peptidase M28	Transferrin receptor-like, dimerisation	Protease-associated PA				162833	42.0692	8.32667e-17	8.32667e-17	8.32667e-17	9.75482	444.907	8.32667e-17	8.32667e-17	5.88868	19.6567	466.301	1531.07
30176	Gamm-glutamyl	Gamma-glutamyltranspeptidase						30176	19.79	8.32667e-17	1.45761	8.32667e-17	13.9223	459.09	8.32667e-17	1.80339	4.42566	7.58448	390.868	1511.19
146884	Cysteine	Peptidase C19, ubiquitin carboxyl-terminal hydrolase 2						146884	37.6231	8.32667e-17	8.32667e-17	3.30288	6.97653	364.097	8.32667e-17	8.32667e-17	1.50011	3.05786	464.47	1480.78
166264	Cysteine	Peptidase C48, SUMO/Sentrin/Ubl1						166264	27.1944	8.32667e-17	1.45761	3.30288	12.5331	477.857	8.32667e-17	8.32667e-17	1.50011	15.1296	430.057	1477.27
167753	Metallo	Peptidase M13, neprilysin	Peptidase M13	Peptidase M, neutral zinc metallopeptidases, zinc-binding site				167753	103.323	8.32667e-17	1.45761	8.32667e-17	16.7007	340.496	8.32667e-17	1.80339	14.6674	13.6206	520.969	1465.57
165799	Metallo	Peptidase M24, methionine aminopeptidase	Peptidase M24, catalytic core	Peptidase M24A, methionine aminopeptidase, subfamily 1				165799	21.3261	8.32667e-17	1.45761	8.32667e-17	6.97653	321.737	8.32667e-17	1.80339	2.96278	10.6025	465.523	1425.8
174325	Cysteine	PF10275Peptidase C65 Otubain						174325	37.1418	1.22207	8.32667e-17	1.67616	11.144	418.816	0.0405159	3.54902	2.96278	12.1115	564.654	1353.29
113614	Serine	Peptidase S8 and S53, subtilisin, kexin, sedolisin	Proteinase inhibitor I9, subtilisin propeptide		Proteinase inhibitor, propeptide			113614	33.2455	8.32667e-17	1.45761	8.32667e-17	12.5331	618	8.32667e-17	8.32667e-17	1.50011	3.05786	356.463	1332.23
160569	Metallo	Peptidase M20	Glutathione degradosome, DUG2	WD40 repeat-like	WD40 repeat	Peptidase M20, dimerisation		160569	38.6773	8.32667e-17	8.32667e-17	8.32667e-17	6.97653	361.18	8.32667e-17	8.32667e-17	2.96278	7.58448	409.173	1308.84
162747	Serine	Peptidase S41						162747	74.3355	8.32667e-17	8.32667e-17	8.32667e-17	11.144	384.157	8.32667e-17	8.32667e-17	8.32667e-17	8.32667e-17	277.338	1284.28
163102	Cysteine	Peptidase C12, ubiquitin carboxyl-terminal hydrolase 1						163102	23.0454	8.32667e-17	8.32667e-17	1.67616	8.36567	332.017	8.32667e-17	8.32667e-17	8.32667e-17	3.05786	400.887	1276.09
144034	Metallo	Peptidase M16, C-terminal	Peptidase M16C associated	Metalloenzyme, LuxS/M16 peptidase-like, metal-binding				144034	9.01145	1.22207	8.32667e-17	1.67616	11.144	287.926	0.0405159	8.32667e-17	8.32667e-17	3.05786	325.129	1246.85
147831	Cysteine	Peptidase C19, ubiquitin carboxyl-terminal hydrolase 2	MORN motif	MATH	TRAF-like	Zinc finger, RING-type		147831	43.9714	8.32667e-17	8.32667e-17	3.30288	8.32667e-17	228.953	8.32667e-17	8.32667e-17	8.32667e-17	6.07552	421.587	1207.08
168109	Serine	Peptidase S8 and S53, subtilisin, kexin, sedolisin						168109	30.3805	8.32667e-17	8.32667e-17	8.32667e-17	29.2032	421.4	8.32667e-17	8.32667e-17	2.96278	4.56662	547.123	1179.01
138344	Metallo	Peptidase M28	Protease-associated PA					138344	37.3022	8.32667e-17	8.32667e-17	1.67616	11.144	387.488	8.32667e-17	8.32667e-17	7.35175	7.58448	378.345	1176.67
149746	Cysteine	Peptidase C19, ubiquitin carboxyl-terminal hydrolase 2	Rhodanese-like					149746	23.8019	8.32667e-17	8.32667e-17	1.67616	4.19837	296.28	8.32667e-17	8.32667e-17	1.50011	4.56662	397.922	1161.46
168207	Serine	Peptidase S9, prolyl oligopeptidase active site region	WD40-like Beta Propeller					168207	85.7472	8.32667e-17	8.32667e-17	3.30288	9.75482	247.188	8.32667e-17	1.80339	8.32667e-17	4.56662	365.166	1156.79
169742	Metallo	Peptidase M20	Peptidase M20, dimerisation					169742	6.99199	0.0353364	8.32667e-17	8.32667e-17	1.42063	208.389	1.25767	8.32667e-17	8.32667e-17	8.32667e-17	282.682	1138.07
184812	Serine	Peptidase S10, serine carboxypeptidase						184812	73.923	8.32667e-17	7.15104	16.3215	45.8731	997.274	8.32667e-17	7.04137	39.5406	49.837	927.553	1128.71
165339	Serine	Peptidase S8 and S53, subtilisin, kexin, sedolisin						165339	23.2517	8.32667e-17	8.32667e-17	8.32667e-17	2.80941	286.706	8.32667e-17	8.32667e-17	8.32667e-17	4.56662	341.273	1126.38
163855	Serine	Peptidase S1C, HrtA/DegP2/Q/S	Peptidase S1 and S6, chymotrypsin/Hap	PDZ/DHR/GLGF	Peptidase, trypsin-like serine and cysteine			163855	28.3405	8.32667e-17	1.45761	1.67616	11.144	326.681	8.32667e-17	1.80339	8.32667e-17	3.05786	392.763	1118.19
167407	Cysteine	Ovarian tumour, otubain						167407	19.8359	8.32667e-17	8.32667e-17	1.67616	4.19837	198.218	8.32667e-17	8.32667e-17	8.32667e-17	8.32667e-17	347.158	1060.88
24639	Aspartyl	Peptidase A1	Peptidase aspartic, active site	Peptidase aspartic, catalytic				24639	21.5324	8.32667e-17	8.32667e-17	8.32667e-17	20.8682	874.216	8.32667e-17	1.80339	1.50011	1.54936	643.39	1038.65
162540	Cysteine	Peptidase C1B, bleomycin hydrolase	Peptidase, cysteine peptidase active site					162540	184.646	8.32667e-17	8.32667e-17	1.67616	20.8682	326.15	8.32667e-17	8.32667e-17	4.42566	16.6386	306.576	1012.92
103295	Metallo	Peptidase M14, carboxypeptidase A	Proteinase inhibitor, propeptide					103295	0.139471	0.0353364	8.32667e-17	8.32667e-17	8.32667e-17	156.686	1.25767	8.32667e-17	8.32667e-17	8.32667e-17	243.08	984.849
177490	Serine	Peptidase S53, propeptide	Peptidase S8 and S53, subtilisin, kexin, sedolisin	Proteinase inhibitor, propeptide				177490	5.45387	0.0353364	8.32667e-17	1.67616	5.58742	776.239	1.25767	8.32667e-17	8.32667e-17	4.56662	728.232	968.474
162850	Metallo-like	IPR021917Unchr_Zn-peptidase-like						162850	7.84118	8.32667e-17	1.45761	8.32667e-17	8.32667e-17	159.538	8.32667e-17	8.32667e-17	8.32667e-17	8.32667e-17	274.023	966.135
27866	Glutamate/glutamine	Peptidase G1, eqolisin	Concanavalin A-like lectin/glucanase					27866	33.9331	8.32667e-17	1.45761	6.55721	15.3115	855.312	8.32667e-17	1.80339	2.96278	8.32667e-17	562.29	961.456
127176	Metallo	Peptidase M3A and M3B, thimet/oligopeptidase F	Peptidase M, neutral zinc metallopeptidases, zinc-binding site					127176	14.4476	8.32667e-17	8.32667e-17	3.30288	15.3115	365.592	8.32667e-17	8.32667e-17	4.42566	16.6386	273.195	960.287
110688	Metallo	Peptidase M, neutral zinc metallopeptidases, zinc-binding site	Ubiquitin	WLM				110688	12.7964	8.32667e-17	8.32667e-17	8.32667e-17	8.32667e-17	181.95	8.32667e-17	8.32667e-17	1.50011	8.32667e-17	274.311	954.439
177125	Metallo	Peptidase M24, methionine aminopeptidase	Peptidase M24, catalytic core	Peptidase M24A, methionine aminopeptidase, subfamily 2				177125	60.7923	8.32667e-17	8.32667e-17	8.32667e-17	4.19837	246.964	8.32667e-17	8.32667e-17	8.32667e-17	1.54936	326.118	952.099
156535	Metallo	Peptidase M28	Protease-associated PA					156535	23.6873	8.32667e-17	8.32667e-17	3.30288	6.97653	435.436	8.32667e-17	8.32667e-17	1.50011	1.54936	233.194	949.76
127166	Serine	Peptidase S33, prolyl aminopeptidase	Alpha/beta hydrolase fold-1					127166	39.8462	8.32667e-17	2.88075	8.32667e-17	2.80941	212.271	8.32667e-17	8.32667e-17	4.42566	7.58448	271.969	946.251
151100	Serine	Peptidase S9, prolyl oligopeptidase active site region	Peptidase S9B, dipeptidylpeptidase IV N-terminal	Lipocalin				151100	37.3022	8.32667e-17	8.32667e-17	3.30288	9.75482	226.642	8.32667e-17	8.32667e-17	8.32667e-17	6.07552	253.304	934.555
155860	Metallo	Peptidase M14, carboxypeptidase A	Proteinase inhibitor, propeptide					155860	6.94609	8.32667e-17	8.32667e-17	8.32667e-17	5.58742	506.568	8.32667e-17	8.32667e-17	8.32667e-17	8.32667e-17	352.003	919.349
162332	Serine	Peptidase S10, serine carboxypeptidase						162332	13.5762	1.22207	1.45761	1.67616	16.7007	514.036	0.0405159	8.32667e-17	4.42566	7.58448	511.167	913.501
165037	Cysteine	Peptidase C19, ubiquitin carboxyl-terminal hydrolase 2						165037	13.5533	8.32667e-17	1.45761	1.67616	2.80941	191.334	8.32667e-17	8.32667e-17	5.88868	6.07552	297.282	893.617
40600	Cysteine	Peptidase C19, ubiquitin carboxyl-terminal hydrolase 2	Exonuclease	WD40 repeat-like	Polynucleotidyl transferase, Ribonuclease H fold	Exonuclease, RNase T and DNA polymerase III		40600	27.4924	8.32667e-17	8.32667e-17	8.32667e-17	5.58742	213.723	8.32667e-17	8.32667e-17	8.32667e-17	4.56662	290.807	892.448
170457	Metallo	Peptidase M24, catalytic core	Peptidase M24B, X-Pro dipeptidase/aminopeptidase P N-terminal					170457	11.2597	8.32667e-17	8.32667e-17	8.32667e-17	1.42063	246.684	8.32667e-17	8.32667e-17	8.32667e-17	6.07552	284.412	876.073
110928	Metallo	Peptidase M28						110928	30.6326	8.32667e-17	8.32667e-17	1.67616	6.97653	246.723	8.32667e-17	8.32667e-17	1.50011	13.6206	289.791	870.225
37373	Cysteine	Peptidase C54						37373	25.6816	8.32667e-17	1.45761	8.32667e-17	2.80941	214.939	8.32667e-17	8.32667e-17	8.32667e-17	1.54936	276.03	858.528
166888	Aspartyl	Peptidase aspartic, catalytic	MFS general substrate transporter					166888	26.9652	8.32667e-17	8.32667e-17	4.92996	22.2573	205.693	8.32667e-17	1.80339	4.42566	10.6025	274.586	850.341
168958	Metallo	Peptidase M14, carboxypeptidase A						168958	3.61636	8.32667e-17	1.45761	1.67616	2.80941	176.338	8.32667e-17	8.32667e-17	8.32667e-17	8.32667e-17	229.913	838.644
142012	Serine	Peptidase S54, rhomboid						142012	19.2857	8.32667e-17	8.32667e-17	3.30288	2.80941	227.092	8.32667e-17	8.32667e-17	2.96278	3.05786	316.505	833.966
91685	Serine	Peptidase S15	Peptidase S15/CocE/NonD, C-terminal	CocE/NonD hydrolase	Galactose-binding like			91685	0.633108	8.32667e-17	1.45761	8.32667e-17	5.58742	216.512	8.32667e-17	8.32667e-17	4.42566	1.54936	313.705	832.796
150024	Aspartyl	Peptidase A1	Major intrinsic protein	Peptidase aspartic, catalytic				150024	11.9707	8.32667e-17	8.32667e-17	1.67616	1.42063	155.513	8.32667e-17	8.32667e-17	1.50011	3.05786	263.215	824.609
155522	Cysteine	Peptidase C48, SUMO/Sentrin/Ubl1						155522	20.2486	8.32667e-17	1.45761	1.67616	5.58742	230.677	8.32667e-17	8.32667e-17	2.96278	6.07552	262.75	823.439
163932	Cysteine	Peptidase C12, ubiquitin carboxyl-terminal hydrolase 1	Ubiquitinyl hydrolase, UCH37 type					163932	25.1773	1.22207	1.45761	8.32667e-17	2.80941	200.233	0.0405159	8.32667e-17	8.32667e-17	16.6386	250.338	805.895
180239	Serine	Peptidase S41						180239	9.58504	8.32667e-17	8.32667e-17	8.32667e-17	8.32667e-17	180.046	8.32667e-17	8.32667e-17	8.32667e-17	8.32667e-17	203.127	784.841
168041	Signal	Microsomal signal peptidase 25 kDa subunit	Phosphopantetheine attachment site					168041	28.6155	8.32667e-17	1.45761	1.67616	8.36567	234.964	8.32667e-17	8.32667e-17	1.50011	7.58448	308.51	775.484
179912	Metallo	Peptidase M24, catalytic core	Peptidase M24B, X-Pro dipeptidase/aminopeptidase P N-terminal	Peptidase M24B, X-Pro dipeptidase/aminopeptidase P, conserved site				179912	19.0105	8.32667e-17	1.45761	8.32667e-17	9.75482	166.007	8.32667e-17	8.32667e-17	1.50011	4.56662	256.638	761.448
46881	Cysteine	Peptidase C2, calpain	Cell surface antigen					46881	9.33267	8.32667e-17	8.32667e-17	8.32667e-17	5.58742	294.893	8.32667e-17	8.32667e-17	1.50011	3.05786	206.878	750.922
144032	Metallo	Peptidase M20	Peptidase M20, dimerisation	ArgE/DapE/ACY1/CPG2/YscS, conserved site				144032	14.0119	8.32667e-17	8.32667e-17	8.32667e-17	8.32667e-17	181.296	8.32667e-17	8.32667e-17	1.50011	1.54936	196.439	750.922
87464	Serine	Peptidase S9, prolyl oligopeptidase active site region						87464	14.31	8.32667e-17	8.32667e-17	1.67616	4.19837	194.373	8.32667e-17	8.32667e-17	8.32667e-17	1.54936	187.208	740.395
165139	Metallo	Peptidase M28	Transferrin receptor-like, dimerisation	Protease-associated PA				165139	21.1656	8.32667e-17	1.45761	8.32667e-17	2.80941	176.49	8.32667e-17	1.80339	8.32667e-17	6.07552	248.713	739.225
150934	Cysteine	Peptidase C19, ubiquitin carboxyl-terminal hydrolase 2						150934	6.94609	8.32667e-17	8.32667e-17	8.32667e-17	2.80941	197.368	8.32667e-17	8.32667e-17	1.50011	8.32667e-17	223.452	733.377
109261	Cysteine	Ovarian tumour, otubain						109261	13.7597	8.32667e-17	8.32667e-17	1.67616	8.32667e-17	144.277	8.32667e-17	8.32667e-17	8.32667e-17	1.54936	179.867	731.038
21934	Cysteine	Peptidase C45, acyl-coenzyme A:6-aminopenicillanic acid acyl-transferase						21934	9.44739	8.32667e-17	8.32667e-17	8.32667e-17	8.32667e-17	182.154	8.32667e-17	8.32667e-17	8.32667e-17	1.54936	156.268	724.02
167435	Serine	Peptidase S14, ClpP						167435	14.3559	8.32667e-17	8.32667e-17	1.67616	8.32667e-17	151.346	8.32667e-17	8.32667e-17	8.32667e-17	3.05786	233.606	714.663
155630	Metallo	Peptidase M14, carboxypeptidase A						155630	1.61696	8.32667e-17	2.88075	8.32667e-17	1.42063	96.9552	8.32667e-17	8.32667e-17	8.32667e-17	1.54936	175.035	701.797
138436	Metallo	Peptidase M28						138436	20.7071	8.32667e-17	8.32667e-17	8.32667e-17	2.80941	206.471	8.32667e-17	8.32667e-17	8.32667e-17	1.54936	210.134	690.1
185131	Serine	Peptidase S10, serine carboxypeptidase						185131	4.14477	8.32667e-17	2.88075	32.5953	161.172	615.623	8.32667e-17	3.54902	162.441	274.675	403.655	667.877
46850	Metallo	Peptidase M28						46850	18.552	8.32667e-17	8.32667e-17	1.67616	5.58742	188.003	8.32667e-17	8.32667e-17	1.50011	1.54936	208.586	665.538
50590	Cysteine	Peptidase C19, ubiquitin carboxyl-terminal hydrolase 2						50590	13.9202	8.32667e-17	1.45761	1.67616	2.80941	147.427	8.32667e-17	1.80339	2.96278	3.05786	237.578	656.181
23952	Serine	Peptidase S15	Peptidase S15/CocE/NonD, C-terminal	CocE/NonD hydrolase	Galactose-binding like			23952	0.974694	8.32667e-17	1.45761	3.30288	1.42063	252.025	8.32667e-17	1.80339	2.96278	8.32667e-17	292.53	656.181
159701	Aspartyl	Peptidase aspartic, catalytic						159701	22.8849	8.32667e-17	8.32667e-17	8.32667e-17	2.80941	170.719	8.32667e-17	8.32667e-17	2.96278	3.05786	192.287	637.467
167629	Serine	Peptidase S54, rhomboid						167629	14.4018	8.32667e-17	8.32667e-17	1.67616	8.32667e-17	140.639	8.32667e-17	8.32667e-17	2.96278	6.07552	211.979	636.297
125301	Metallo	Peptidase M20	Amidase, hydantoinase/carbamoylase	Peptidase M20, dimerisation				125301	24.1228	8.32667e-17	1.45761	8.32667e-17	8.32667e-17	128.66	8.32667e-17	8.32667e-17	1.50011	4.56662	195.701	623.431
126238	Serine	Peptidase S26A, signal peptidase I	Peptidase S24, S26A, S26B and S26C					126238	18.6437	8.32667e-17	8.32667e-17	1.67616	4.19837	163.176	8.32667e-17	8.32667e-17	2.96278	3.05786	231.085	605.887
162548	Cysteine	Peptidase C13, legumain						162548	11.6267	0.0353364	8.32667e-17	3.30288	8.32667e-17	119.093	1.25767	8.32667e-17	7.35175	4.56662	159.392	589.512
134785	Cysteine	Peptidase C14, caspase catalytic						134785	26.4151	8.32667e-17	1.45761	3.30288	9.75482	177.476	8.32667e-17	8.32667e-17	1.50011	9.09348	209.801	582.494
113253	Serine	Peptidase S33, prolyl aminopeptidase	Alpha/beta hydrolase fold-1	Peptidase S33, proline iminopeptidase 1	Alpha/beta hydrolase			113253	17.7725	8.32667e-17	8.32667e-17	1.67616	2.80941	100.727	8.32667e-17	8.32667e-17	8.32667e-17	1.54936	159.053	562.61
44817	Metallo	Peptidase M19, renal dipeptidase						44817	11.9707	8.32667e-17	8.32667e-17	8.32667e-17	16.7007	124.329	8.32667e-17	1.80339	10.278	9.09348	158.143	522.842
156821	Aspartyl	Peptidase A1	Peptidase aspartic, catalytic					156821	2.07655	8.32667e-17	8.32667e-17	3.30288	22.2573	328.698	8.32667e-17	8.32667e-17	10.278	22.6747	293.138	509.976
158789	Serine	Peptidase S10, serine carboxypeptidase						158789	28.776	8.32667e-17	4.30408	6.55721	36.149	290.227	8.32667e-17	8.32667e-17	4.42566	58.891	276.715	490.092
129562	Serine	Peptidase S41	Signal recognition particle, SRP54 subunit, GTPase					129562	20.8446	8.32667e-17	8.32667e-17	1.67616	2.80941	112.689	8.32667e-17	8.32667e-17	2.96278	3.05786	173.996	488.923
176149	Metallo	Peptidase M22, glycoprotease						176149	10.0439	8.32667e-17	8.32667e-17	1.67616	1.42063	130.972	8.32667e-17	8.32667e-17	8.32667e-17	4.56662	164.939	486.583
159655	Serine	Peptidase S10, serine carboxypeptidase						159655	2.6052	8.32667e-17	8.32667e-17	8.32667e-17	4.19837	184.552	8.32667e-17	8.32667e-17	8.32667e-17	1.54936	138.907	483.075
20011	Serine	Peptidase S41						20011	6.25744	8.32667e-17	1.45761	8.32667e-17	5.58742	170.591	8.32667e-17	8.32667e-17	8.32667e-17	1.54936	180.227	478.396
167975	Serine	Peptidase S15	Peptidase S15/CocE/NonD, C-terminal	CocE/NonD hydrolase	Galactose-binding like			167975	14.31	8.32667e-17	8.32667e-17	8.32667e-17	1.42063	118.881	8.32667e-17	8.32667e-17	1.50011	1.54936	142.014	473.717
166295	Gamm-glutamyl	Gamma-glutamyltranspeptidase						166295	6.94609	8.32667e-17	8.32667e-17	8.32667e-17	29.2032	214.147	8.32667e-17	8.32667e-17	11.7411	42.292	187.417	458.512
168876	Serine	Peptidase S26A, signal peptidase I	Peptidase S24, S26A, S26B and S26C					168876	9.4015	8.32667e-17	8.32667e-17	1.67616	2.80941	122.834	8.32667e-17	8.32667e-17	2.96278	8.32667e-17	143.416	447.985
104859	Cysteine	Peptidase C15, pyroglutamyl peptidase I-like						104859	6.78541	8.32667e-17	8.32667e-17	8.32667e-17	1.42063	109.462	8.32667e-17	8.32667e-17	8.32667e-17	1.54936	124.498	429.271
135600	Aspartyl	Peptidase A1	Peptidase aspartic, active site	Peptidase aspartic, catalytic				135600	16.4197	8.32667e-17	1.45761	8.32667e-17	4.19837	181.903	8.32667e-17	8.32667e-17	8.32667e-17	1.54936	267.59	412.896
167463	Cysteine	Peptidase C19, ubiquitin carboxyl-terminal hydrolase 2						167463	10.2503	8.32667e-17	8.32667e-17	8.32667e-17	2.80941	92.6812	8.32667e-17	8.32667e-17	8.32667e-17	1.54936	142.852	407.048
102778	Serine	Peptidase S54, rhomboid						102778	21.6241	8.32667e-17	1.45761	8.32667e-17	8.36567	113.685	8.32667e-17	8.32667e-17	2.96278	6.07552	145.93	397.691
144567	Aspartyl	Peptidase A22B, signal peptide peptidase	Peptidase A22, presenilin signal peptide					144567	10.6174	8.32667e-17	8.32667e-17	8.32667e-17	2.80941	76.7276	8.32667e-17	8.32667e-17	8.32667e-17	8.32667e-17	122.479	377.807
127468	Serine	Peptidase S54, rhomboid						127468	6.02787	8.32667e-17	8.32667e-17	1.67616	2.80941	123.925	8.32667e-17	8.32667e-17	8.32667e-17	3.05786	127.414	361.432
169018	Cysteine	Ovarian tumour, otubain						169018	8.04771	8.32667e-17	8.32667e-17	8.32667e-17	2.80941	88.2095	8.32667e-17	8.32667e-17	8.32667e-17	6.07552	104.1	349.736
162959	Serine	Peptidase S10, serine carboxypeptidase						162959	13.7826	8.32667e-17	8.32667e-17	1.67616	8.32667e-17	102.328	8.32667e-17	8.32667e-17	1.50011	7.58448	89.7594	349.736
185088	Threonine	Peptidase T2, asparaginase 2						185088	20.0652	8.32667e-17	2.88075	8.32667e-17	8.32667e-17	78.5683	8.32667e-17	8.32667e-17	8.32667e-17	3.05786	77.3367	345.057
96029	Metallo	Peptidase M20	Peptidase M20, dimerisation	ArgE/DapE/ACY1/CPG2/YscS, conserved site				96029	1.59399	8.32667e-17	8.32667e-17	8.32667e-17	1.42063	57.8898	8.32667e-17	8.32667e-17	8.32667e-17	1.54936	84.7533	342.718
166154	Aspartyl	Peptidase A1	Peptidase aspartic, catalytic					166154	10.5486	8.32667e-17	8.32667e-17	8.32667e-17	8.32667e-17	98.7379	8.32667e-17	8.32667e-17	8.32667e-17	3.05786	108.308	338.039
135683	Serine	Peptidase S54, rhomboid						135683	11.7184	8.32667e-17	8.32667e-17	8.32667e-17	6.97653	81.8227	8.32667e-17	8.32667e-17	8.32667e-17	1.54936	113.273	338.039
43205	Metallo	Peptidase M14, carboxypeptidase A	Proteinase inhibitor, propeptide					43205	13.9202	8.32667e-17	8.32667e-17	1.67616	2.80941	69.9291	8.32667e-17	8.32667e-17	8.32667e-17	8.32667e-17	103.671	335.7
39300	Serine	Peptidase S8 and S53, subtilisin, kexin, sedolisin	Proteinase inhibitor I9, subtilisin propeptide	Proteinase inhibitor, propeptide				39300	2.12252	8.32667e-17	8.32667e-17	8.32667e-17	4.19837	79.7847	8.32667e-17	8.32667e-17	8.32667e-17	8.32667e-17	73.3911	320.495
159688	Signal	Microsomal signal peptidase 12 kDa subunit						159688	20.3861	8.32667e-17	8.32667e-17	1.67616	6.97653	104.422	8.32667e-17	8.32667e-17	8.32667e-17	9.09348	139.081	305.29
93162	Metallo	Peptidase M, neutral zinc metallopeptidases, zinc-binding site						93162	4.07585	8.32667e-17	8.32667e-17	8.32667e-17	8.32667e-17	55.1378	8.32667e-17	8.32667e-17	8.32667e-17	4.56662	76.7253	302.95
174679	Cysteine	Peptidase C19, ubiquitin carboxyl-terminal hydrolase 2	Zinc finger, UBP-type					174679	6.34927	0.0353364	8.32667e-17	8.32667e-17	4.19837	78.0165	1.25767	8.32667e-17	8.32667e-17	8.32667e-17	121.177	291.254
108687	Serine	Peptidase S15	Peptidase S15/CocE/NonD, C-terminal	CocE/NonD hydrolase	Galactose-binding like			108687	2.35237	8.32667e-17	8.32667e-17	8.32667e-17	8.32667e-17	68.1165	8.32667e-17	8.32667e-17	8.32667e-17	1.54936	75.761	265.522
151136	Cysteine	Peptidase C2, calpain	Peptidase, cysteine peptidase active site					151136	10.2045	8.32667e-17	8.32667e-17	8.32667e-17	1.42063	48.7178	8.32667e-17	8.32667e-17	8.32667e-17	8.32667e-17	80.4963	257.334
148438	Serine	Peptidase S33, tripeptidyl-peptidase C-terminal	Alpha/beta hydrolase fold-1					148438	9.53916	8.32667e-17	1.45761	1.67616	4.19837	39.2395	8.32667e-17	8.32667e-17	1.50011	8.32667e-17	60.3511	254.995
112059	Metallo	Peptidase M, neutral zinc metallopeptidases, zinc-binding site						112059	3.86909	225.798	121.035	128.608	95.8825	182.303	265.305	117.062	99.5282	104.161	168.317	251.486
42859	Aspartyl	Peptidase aspartic, catalytic						42859	4.81087	8.32667e-17	8.32667e-17	8.32667e-17	2.80941	67.939	8.32667e-17	8.32667e-17	8.32667e-17	8.32667e-17	67.8205	219.906
176992	Metallo	Peptidase M28	Fibronectin, type III	C-5 cytosine-specific DNA methylase	Fibronectin, type III-like fold			176992	5.75236	8.32667e-17	8.32667e-17	1.67616	2.80941	37.0542	8.32667e-17	8.32667e-17	8.32667e-17	3.05786	81.4121	215.227
176510	Metallo	Peptidase M20	Amidase, hydantoinase/carbamoylase	Blue (type 1) copper domain	Peptidase M20, dimerisation			176510	9.47033	8.32667e-17	8.32667e-17	8.32667e-17	8.32667e-17	48.2382	8.32667e-17	8.32667e-17	8.32667e-17	1.54936	58.026	202.361
45953	Cysteine	Peptidase C12, ubiquitin carboxyl-terminal hydrolase 1						45953	6.1197	8.32667e-17	8.32667e-17	8.32667e-17	1.42063	40.9039	8.32667e-17	8.32667e-17	1.50011	8.32667e-17	78.9049	190.665
35319	Cysteine	Peptidase C12, ubiquitin carboxyl-terminal hydrolase 1						35319	1.70886	8.32667e-17	8.32667e-17	8.32667e-17	2.80941	89.0079	8.32667e-17	8.32667e-17	8.32667e-17	8.32667e-17	77.5604	189.495
162319	Metallo	Peptidase M20	Peptidase M20, dimerisation	ArgE/DapE/ACY1/CPG2/YscS, conserved site				162319	8.5296	0.0353364	8.32667e-17	8.32667e-17	2.80941	60.0435	1.25767	8.32667e-17	8.32667e-17	8.32667e-17	63.6506	187.156
108685	Cysteine	Peptidase C69, dipeptidase A						108685	28.3176	8.32667e-17	8.32667e-17	8.32667e-17	6.97653	72.6205	8.32667e-17	8.32667e-17	5.88868	9.09348	109.06	171.951
98484	Cysteine	Peptidase C50, separase						98484	11.2138	8.32667e-17	8.32667e-17	8.32667e-17	1.42063	37.4198	8.32667e-17	8.32667e-17	1.50011	8.32667e-17	40.5859	170.781
134653	Cysteine	Peptidase C12, ubiquitin carboxyl-terminal hydrolase 1						134653	3.22573	8.32667e-17	8.32667e-17	8.32667e-17	8.32667e-17	33.7804	8.32667e-17	8.32667e-17	8.32667e-17	8.32667e-17	48.3087	153.237
41567	Serine	S33.UPWS33.UPW (family S33 unassigned peptidases)						41567	5.89012	8.32667e-17	8.32667e-17	8.32667e-17	8.32667e-17	58.1962	8.32667e-17	8.32667e-17	1.50011	1.54936	43.8477	150.897
149188	Serine	IPR001375Peptidase_S9						149188	5.77532	8.32667e-17	8.32667e-17	8.32667e-17	1.42063	47.2134	8.32667e-17	8.32667e-17	1.50011	8.32667e-17	69.8648	147.388
140664	Metallo	Peptidase M28	Protease-associated PA					140664	19.9505	8.32667e-17	8.32667e-17	8.32667e-17	2.80941	37.4198	8.32667e-17	8.32667e-17	8.32667e-17	1.54936	40.5859	143.88
147695	Cysteine	Peptidase C78, ubiquitin fold modifier-specific peptidase 1 and 2	Di-copper centre-containing					147695	10.9385	8.32667e-17	8.32667e-17	8.32667e-17	8.32667e-17	32.8013	8.32667e-17	8.32667e-17	8.32667e-17	1.54936	61.4197	142.71
30401	Metallo	Peptidase M, neutral zinc metallopeptidases, zinc-binding site						30401	6.73951	8.32667e-17	8.32667e-17	8.32667e-17	8.32667e-17	35.0345	8.32667e-17	8.32667e-17	8.32667e-17	8.32667e-17	47.0462	141.54
18739	Metallo	Peptidase M28	Protease-associated PA					18739	2.28341	8.32667e-17	8.32667e-17	8.32667e-17	1.42063	32.8556	8.32667e-17	8.32667e-17	8.32667e-17	4.56662	64.059	140.371
149807	Serine	Peptidase S8 and S53, subtilisin, kexin, sedolisin	Proteinase inhibitor I9, subtilisin propeptide	Proteinase inhibitor, propeptide				149807	0.587941	8.32667e-17	8.32667e-17	8.32667e-17	8.32667e-17	61.8219	8.32667e-17	8.32667e-17	8.32667e-17	8.32667e-17	36.0564	131.014
90294	Cysteine	Peptidase C12, ubiquitin carboxyl-terminal hydrolase 1						90294	4.23666	8.32667e-17	1.45761	8.32667e-17	1.42063	28.3669	8.32667e-17	8.32667e-17	8.32667e-17	8.32667e-17	38.9202	127.505
158630	Serine	Peptidase S10, serine carboxypeptidase						158630	0.633108	8.32667e-17	8.32667e-17	8.32667e-17	8.32667e-17	8.72005	8.32667e-17	8.32667e-17	8.32667e-17	1.54936	24.877	115.808
21156	Cysteine	Peptidase C48, SUMO/Sentrin/Ubl1						21156	1.84673	8.32667e-17	8.32667e-17	8.32667e-17	8.32667e-17	48.7675	8.32667e-17	8.32667e-17	8.32667e-17	8.32667e-17	33.1014	111.13
103755	Serine	Peptidase S15	Peptidase S15/CocE/NonD, C-terminal	CocE/NonD hydrolase	Galactose-binding like			103755	0.0593439	8.32667e-17	8.32667e-17	8.32667e-17	8.32667e-17	15.481	8.32667e-17	8.32667e-17	8.32667e-17	8.32667e-17	36.9818	108.79
174825	Metallo	Peptidase M14, carboxypeptidase A	Neuraxin/MAP1B repeat	Proteinase inhibitor, propeptide				174825	1.84673	8.32667e-17	1.45761	8.32667e-17	8.32667e-17	32.525	8.32667e-17	8.32667e-17	8.32667e-17	8.32667e-17	49.5706	102.942
44300	Cysteine	Peptidase C14, ICE, catalytic subunit p20, active site						44300	3.34063	8.32667e-17	8.32667e-17	8.32667e-17	8.32667e-17	17.8549	8.32667e-17	8.32667e-17	8.32667e-17	8.32667e-17	30.6017	95.9244
40316	Aspartyl	Peptidase A1	Aminotransferase, class-II, pyridoxal-phosphate binding site	Peptidase aspartic, catalytic				40316	0.951825	8.32667e-17	1.45761	3.30288	40.3165	138.631	8.32667e-17	1.80339	14.6674	46.819	71.701	94.7547
174614	Aspartyl	Peptidase aspartic, active site						174614	2.21446	8.32667e-17	8.32667e-17	8.32667e-17	8.32667e-17	19.1354	8.32667e-17	8.32667e-17	8.32667e-17	1.54936	30.6685	81.8887
42813	Aspartyl	Peptidase A1	Peptidase aspartic, catalytic					42813	22.4264	8.32667e-17	1.45761	1.67616	8.32667e-17	19.0464	8.32667e-17	8.32667e-17	8.32667e-17	8.32667e-17	28.067	80.7191
17961	Aspartyl	Peptidase aspartic, catalytic						17961	1.57102	8.32667e-17	8.32667e-17	8.32667e-17	1.42063	30.3636	8.32667e-17	8.32667e-17	8.32667e-17	8.32667e-17	23.3764	79.5494
91360	Putative	Putative peptidase family						91360	74.5417	8.32667e-17	8.32667e-17	8.32667e-17	8.32667e-17	14.1762	8.32667e-17	8.32667e-17	8.32667e-17	3.05786	5.91043	77.2101
41668	Aspartyl	Peptidase aspartic, catalytic						41668	3.82314	8.32667e-17	8.32667e-17	8.32667e-17	8.32667e-17	24.5111	8.32667e-17	8.32667e-17	8.32667e-17	1.54936	38.7478	76.0405
37476	Serine	Peptidase S41	Calcium-binding EF-hand					37476	2.35237	8.32667e-17	8.32667e-17	8.32667e-17	8.32667e-17	26.5736	8.32667e-17	8.32667e-17	8.32667e-17	8.32667e-17	24.524	73.7012
110510	Glutamate/glutamine	Peptidase G1, eqolisin	Concanavalin A-like lectin/glucanase					110510	0.121574	8.32667e-17	8.32667e-17	8.32667e-17	8.32667e-17	8.28396	8.32667e-17	8.32667e-17	8.32667e-17	8.32667e-17	13.2734	67.853
153523	Serine	Peptidase S28						153523	0.0883609	8.32667e-17	8.32667e-17	8.32667e-17	40.3165	46.3692	8.32667e-17	1.80339	10.278	42.292	38.267	66.6834
162513	Serine	Peptidase S10, serine carboxypeptidase						162513	8.75906	8.32667e-17	8.32667e-17	8.32667e-17	8.32667e-17	30.5766	8.32667e-17	8.32667e-17	2.96278	8.32667e-17	28.5831	66.6834
98376	Metallo	Peptidase M22, glycoprotease						98376	3.13381	0.0353364	8.32667e-17	8.32667e-17	8.32667e-17	28.0103	1.25767	8.32667e-17	1.50011	8.32667e-17	28.4796	62.0048
25517	Cysteine	Peptidase C48, SUMO/Sentrin/Ubl1						25517	0.237502	8.32667e-17	8.32667e-17	8.32667e-17	8.32667e-17	4.23685	8.32667e-17	8.32667e-17	8.32667e-17	8.32667e-17	7.90357	53.8173
178554	Serine	IPR009003Peptidase_S1_PA						178554	0.409259	8.32667e-17	8.32667e-17	8.32667e-17	8.32667e-17	7.06966	8.32667e-17	8.32667e-17	8.32667e-17	8.32667e-17	14.4718	51.4781
97211	Threonine	Peptidase T2, asparaginase 2						97211	3.45552	8.32667e-17	8.32667e-17	8.32667e-17	8.32667e-17	12.2081	8.32667e-17	8.32667e-17	8.32667e-17	8.32667e-17	16.0758	46.7995
24883	Serine	Peptidase S8 and S53, subtilisin, kexin, sedolisin						24883	0.633108	8.32667e-17	8.32667e-17	8.32667e-17	4.19837	30.1245	8.32667e-17	8.32667e-17	2.96278	13.6206	18.1766	39.7817
101417	Serine	Peptidase S15	Peptidase S15/CocE/NonD, C-terminal	CocE/NonD hydrolase	Ribosomal protein S7	Galactose-binding like		101417	0.158064	8.32667e-17	8.32667e-17	8.32667e-17	8.32667e-17	13.5363	8.32667e-17	8.32667e-17	8.32667e-17	8.32667e-17	17.4364	39.7817
159642	Metallo	Peptidase M24, catalytic core						159642	0.158064	8.32667e-17	8.32667e-17	8.32667e-17	8.32667e-17	2.90423	8.32667e-17	8.32667e-17	8.32667e-17	8.32667e-17	6.53914	31.5942
31448	Serine	Peptidase S41						31448	0.0229174	8.32667e-17	8.32667e-17	11.4393	41.7056	89.5634	8.32667e-17	8.32667e-17	61.4874	60.4	48.4646	24.5763
110755	Metallo	Peptidase M28						110755	0.74653	8.32667e-17	8.32667e-17	8.32667e-17	8.32667e-17	7.60524	8.32667e-17	8.32667e-17	8.32667e-17	8.32667e-17	1.71531	23.4067
