# Supplementary material for: Time-Course RNAseq Reveals Exserohilum turcicum Effectors and Pathogenicity Determinants
Source: Front Microbiol. 2020 Mar 20;11:360. doi: 10.3389/fmicb.2020.00360 (PMC7099616; doi:10.3389/fmicb.2020.00360)
Supplement: Supplementary file 5 [file Table_5.XLSX]

## Sheet: Sheet1
Supplementary Table 5 Annotation of cell wall degrading enzymes identified from the Exserohilum turcicum Et28A genome. BLAST best hits, interpro domains and KEGG definitions are shown.
Protein ID	Substrate	Sequence description	CAZyme ID	BLAST result	Length	Identity	Score	Expect value	InterPro description					KEGG definition
19126	?	Pectate lyase	PL3_2 Polysaccharide Lyase Family 3	pectate lyase [Aspergillus nidulans FGSC A4]	260	0.6382	301	1e-82	Pectate lyase, catalytic	Pectin lyase fold/virulence factor
19352	Xylan	Alpha-glucuronidase	GH67	Lema_T035690.1 [Leptosphaeria maculans]	835	0.7559	999.99	0	Glycoside hydrolase family 67	Alpha-glucuronidase
19432	Xylan	Endoxylanase	GH11	PTRG_08873 [Pyrenophora tritici-repentis]	227	0.9162	445	1e-126	Glycoside hydrolase, family 11	Concanavalin A-like lectin/glucanase
20746	?	Xyloglucan-specific endoglucanase	GH12	xyloglucan-specific endoglucanase [Aspergillus nidulans FGSC A4]	239	0.5714	265	1e-71	Glycoside hydrolase, family 12	Concanavalin A-like lectin/glucanase
20945	?	Acetyl xylan esterase	CE1	acetyl xylan esterase [Aspergillus niger]	304	0.4383	258	1e-69	Esterase, PHB depolymerase
21283	Pectin	Polygalacturonase	GH28	SNOG_13575 [Stagonospora nodorum]	421	0.7071	641	0	Glycoside hydrolase, family 28	Pectin lyase fold/virulence factor				Galacturan 1,4-alpha-galacturonidase.
21667	Pectin	Alpha-rhamnosidase	GH78	SNOG_15350 [Stagonospora nodorum]	834	0.7992	999.99	0	Bacterial alpha-L-rhamnosidase	Six-hairpin glycosidase-like
22059	?	Mannan endo-1,6-beta-mannosidase.	GH76	N/A	N/A	N/A	N/A	N/A	Glycoside hydrolase, family 76	Mannan endo-1,6-alpha-mannosidase	Six-hairpin glycosidase-like			Mannan endo-1,6-beta-mannosidase.
23241	?	Endo-beta-1,3-glucanase	GH17	endo-beta-1,3-glucanase [Aspergillus nidulans FGSC A4]	649	0.2155	55.8	1e-08	Glycoside hydrolase, family 17					Glucan 1,3-beta-glucosidase.
23321	?	Esterase	CE12	N/A	N/A	N/A	N/A	N/A	Esterase, SGNH hydrolase-type
23637	?	Probable beta-glucosidase A	GH3	Probable beta-glucosidase A [Aspergillus niger CBS 513.88]	860	0.467	705	0	Glycoside hydrolase, family 3, N-terminal					Beta-glucosidase.
23800	?	Endoglucanase B	N/A	N/A	N/A	N/A	N/A	N/A	Glycoside hydrolase, family 5, endoglucanase B	Protein of unknown function DUF291	Immunoglobulin E-set
24141	?	Alpha-L-arabinofuranosidase	GH54 | CBM42	alpha-L-arabinofuranosidase [Aspergillus nidulans argB2]	510	0.7351	769	0	Alpha-L-arabinofuranosidase B	Concanavalin A-like lectin/glucanase
24570	Cutin	Cutinase	CE5	PTRG_02747 [Pyrenophora tritici-repentis]	223	0.8009	330	3e-91	Cutinase
24572	Cellulose	Cellobiohydrolase	GH7	Lema_T062890.1 [Leptosphaeria maculans]	453	0.8807	863	0	Glycoside hydrolase, family 7	Concanavalin A-like lectin/glucanase
25148	?	FII_CMCase	CBM1|CBM50	FII-CMCase [Aspergillus aculeatus No.F-50]	412	0.4141	68.2	1e-12	Cellulose-binding region, fungal
25278	?	Chitinase.	GH18	N/A	N/A	N/A	N/A	N/A	Glycoside hydrolase, family 18, catalytic domain	Indoleamine 2,3-dioxygenase	Chitinase II			Chitinase.
25422	Glacto(gluco)-mannan	Alpha-mannosidase	GH47	PTRG_00082 [Pyrenophora tritici-repentis]	517	0.7858	745	0	Glycoside hydrolase, family 47					Mannosyl-oligosaccharide 1,2-alpha-mannosidase.
26176	?	Beta-N-acetylhexosaminidase.	GH20	N/A	N/A	N/A	N/A	N/A	Glycoside hydrolase, family 20					Beta-N-acetylhexosaminidase.
27404	Pectin	Pectate lyase	PL1_7 Polysaccharide Lyase Family 1	Lema_T099100.1 [Leptosphaeria maculans]	326	0.6483	431	1e-121	Pectate lyase/Amb allergen	Pectin lyase fold/virulence factor
30210	Cellulose	Alpha-glucosidase	GH31	PTRG_02367 [Pyrenophora tritici-repentis]	905	0.7894	999.99	0	Glycoside hydrolase, family 31					Alpha-glucosidase.
30827	Cellulose	Cellobiohydrolase	CBM50|AA9	gm1.719_g [Sistotremastrum suecicum]	862	0.4218	52	3e-07
30973	?	Beta-glucosidase	GH3	Periplasmic beta-glucosidase [Escherichia coli str. K-12 substr. W3110]	765	0.2565	120	1e-27	Glycoside hydrolase, family 3, N-terminal					Beta-glucosidase.
31057	Pectin	Pectin methylesterase	CE8	PTRG_10681 [Pyrenophora tritici-repentis]	382	0.7968	653	0	Pectinesterase, catalytic	Pectin lyase fold/virulence factor
32801	?	Lipase	CE16	N/A	N/A	N/A	N/A	N/A	Lipase, GDSL	Esterase, SGNH hydrolase-type
32881	?	Beta-1,2-D-glucosidase	GH3	beta-1,2-D-glucosidase [Septoria lycopersici]	803	0.5109	770	0	Glycoside hydrolase, family 3					Beta-glucosidase.
33142	?	Lipase	CE16	N/A	N/A	N/A	N/A	N/A	Lipase, GDSL	Esterase, SGNH hydrolase-type
33321	Cellulose	Cellobiohydrolase	GH7	Lema_T013700.1 [Leptosphaeria maculans]	455	0.8329	836	0	Glycoside hydrolase, family 7	Concanavalin A-like lectin/glucanase
36811	?	Endo-1,4-beta-galactanase	GH53	endo-1,4-beta-galactanase [Aspergillus niger CBS 120.49]	350	0.5175	356	6e-99	Glycosyl hydrolase 53					Arabinogalactan endo-1,4-beta-galactosidase.
37065	Cutin	Cutinase	CE5	e_gw1.5.664.1 [Sphaerobolus stellatus]	193	0.3413	89.4	9e-19	Cutinase
37224	?	Putative beta-glucosidase	GH17	putative beta-glucosidase [Aspergillus nidulans FGSC A4]	555	0.2665	157	5e-39	Glycoside hydrolase, catalytic core					Glucan 1,3-beta-glucosidase.
37672	Cellulose	Cellobiohydrolase	GH6	Lema_T019220.1 [Leptosphaeria maculans]	396	0.8459	698	0	Glycoside hydrolase, family 6	1, 4-beta cellobiohydrolase
38478	Xylan	Endoxylanase	GH10	fgenesh1_pg.C_scaffold_12000183 [Cochliobolus heterostrophus]	351	0.8101	590	1e-169	Glycoside hydrolase, family 10
42664	Pectin	Polygalacturonase	GH28	PTRG_11218 [Pyrenophora tritici-repentis]	390	0.7023	563	1e-161	Glycoside hydrolase, family 28	Parallel beta-helix repeat	Pectin lyase fold/virulence factor			Polygalacturonase.
42739	?	Alpha-galactosidase	GH27	alpha-galactosidase [Aspergillus niger CBS 120.49]	443	0.3381	239	1e-63	Glycoside hydrolase, family 27	Glycoside hydrolase, melibiase				Alpha-galactosidase.
43084	?	Beta-D-glucoside glucohydrolase	GH3	beta-D-glucoside glucohydrolase [Hypocrea jecorina QM9414]	744	0.6246	886	0	Glutamine amidotransferase superfamily	Anthranilate synthase component II/delta crystallin	Carbamoyl phosphate synthase	Glycoside hydrolase, family 3		Beta-glucosidase.
44742	?	Beta-glucosidase	GH3	beta-glucosidase [Aspergillus nidulans FGSC A4]	845	0.5913	988	0	Glycoside hydrolase, family 3					Beta-glucosidase.
45067	?	Acetylxylan esterase	CE1	acetylxylan esterase [Aspergillus nidulans FGSC A4]	304	0.6148	395	1e-111	Esterase, PHB depolymerase
45450	?	Chitinase.	GH18	N/A	N/A	N/A	N/A	N/A	Glycoside hydrolase, family 18	Chitinase II				Chitinase.
46256	?	Chitinase.	GH18	N/A	N/A	N/A	N/A	N/A	Glycoside hydrolase, family 18, catalytic domain	Chitinase II				Chitinase.
74773	Glacto(gluco)-mannan	Alpha-mannosidase	GH47	PTRG_02419 [Pyrenophora tritici-repentis]	402	0.5511	430	1e-121	Glycoside hydrolase, family 47					Mannosyl-oligosaccharide 1,2-alpha-mannosidase.
80902	?	Barwin-related endoglucanase	CBM63|CBM1	N/A	N/A	N/A	N/A	N/A	Barwin-related endoglucanase	Rare lipoprotein A	Expansin 45, endoglucanase-like	Pollen allergen/expansin, C-terminal
85317	Cutin	Cutinase	CE5	PTRG_04771 [Pyrenophora tritici-repentis]	250	0.729	360	1e-100	Cutinase	Lipase, active site
86138	Pectin	Pectate lyase	PL1_10 Polysaccharide Lyase Family 1	Lema_T047470.1 [Leptosphaeria maculans]	519	0.7305	519	1e-148	Pectate lyase/Amb allergen	Pectin lyase fold/virulence factor
86411	Cellulose	Cellobiohydrolase	Cellobiohydrolase	gm1.719_g [Sistotremastrum suecicum]	862	0.5454	385	1e-108	Glycoside hydrolase, family 5
86616	Xylan	Endoxylanase	CBM1 | GH10	PTRG_04656 [Pyrenophora tritici-repentis]	422	0.6367	550	1e-157	Cellulose-binding region, fungal	Glycoside hydrolase, family 10
87091	?	Endoglucanase B	Endoglucanase B	endoglucanase B [Aspergillus niger CBS 120.49]	331	0.5818	407	1e-114	Glycoside hydrolase, family 5
87292	?	Barwin-related endoglucanase	CBM63	N/A	N/A	N/A	N/A	N/A	Pollen allergen/expansin, C-terminal	Barwin-related endoglucanase
87823	Cellulose	Cellobiohydrolase	GH7	Lema_T037040.1 [Leptosphaeria maculans]	455	0.8464	834	0	Glycoside hydrolase, family 7	Concanavalin A-like lectin/glucanase
89169	Pectin	Pectin methylesterase	GH43	AFL2G_08528 [Aspergillus flavus]	573	0.4143	184	8e-47	Glycoside hydrolase, family 43	Aldehyde dehydrogenase, conserved site
89412	Pectin	Beta-D-galactosidase	GH2	NFIA_072410 [Neosartorya fischeri]	1055	0.2147	82.8	3e-16	Glycoside hydrolase family 2	Galactose-binding like				Beta-glucuronidase.
90155	Pectin	Polygalacturonase	GH28	NFIA_008150 [Neosartorya fischeri]	378	0.5382	385	1e-107	Glycoside hydrolase, family 28	Parallel beta-helix repeat	Pectin lyase fold/virulence factor			Polygalacturonase.
91125	Xylan	Endoxylanase	GH11	PTRG_10207 [Pyrenophora tritici-repentis]	221	0.8099	380	1e-106	Glycoside hydrolase, family 11	Concanavalin A-like lectin/glucanase
91569	?	Beta-1,4-xylanase precurosor	GH11	beta-1,4-xylanase precursor [Cochliobolus sativus]	231	0.9347	461	1e-130	Glycoside hydrolase, family 11	Concanavalin A-like lectin/glucanase
92363	Pectin	Polygalacturonase	GH28	Lema_T075150.1 [Leptosphaeria maculans]	384	0.6432	498	1e-141	Glycoside hydrolase, family 28	Parallel beta-helix repeat	Pectin lyase fold/virulence factor			Polygalacturonase.
92959	?	Beta-glucosidase	GH3	beta-glucosidase [Aspergillus nidulans FGSC A4]	845	0.3591	437	1e-123	Glycoside hydrolase, family 3					Beta-glucosidase.
93263	Pectin	Pectate lyase	PL1_2 Polysaccharide Lyase Family 1	AFL2G_09523 [Aspergillus flavus]	419	0.6658	545	1e-156	Pectin lyase fold/virulence factor
93800	?	Chitinase.	GH18	N/A	N/A	N/A	N/A	N/A	Glycoside hydrolase, family 18, catalytic domain	Chitinase II	Inorganic pyrophosphatase	Glycoside hydrolase, chitinase active site		Chitinase.
93857	?	Acetylxylan esterase	CE5	acetylxylan esterase (MCYG_08575) [Arthroderma otae CBS 113480]	307	0.3379	101	3e-22	Cutinase
94022	Glacto(gluco)-mannan	Alpha-mannosidase	GH47	Lema_T106420.1 [Leptosphaeria maculans]	593	0.7271	879	0	Glycoside hydrolase, family 47					Mannosyl-oligosaccharide 1,2-alpha-mannosidase.
94076	Xylan	Endoxylanase	GH11	PTRG_10827 [Pyrenophora tritici-repentis]	231	0.8333	400	1e-112	Glycoside hydrolase, family 11	Concanavalin A-like lectin/glucanase
94164	Cellulose	Alpha-glucosidase	GH31	PTRG_09295 [Pyrenophora tritici-repentis]	848	0.8396	999.99	0	Glycoside hydrolase, family 31					Alpha-glucosidase.
95527	Pectin	Rhamnogalacturonan acetylesterase	CE12	fgenesh1_pm.C_scaffold_5000134 [Cochliobolus heterostrophus]	267	0.6816	371	1e-103	Lipase, GDSL	Esterase, SGNH hydrolase-type
96020	?	Amidohydrolase	CE9	N/A	N/A	N/A	N/A	N/A	Amidohydrolase 3	N-acetylglucosamine-6-phosphate deacetylase	Metal-dependent hydrolase, composite			N-acetylglucosamine-6-phosphate deacetylase.
96499	?	Pectate lyase	PL3_2 Polysaccharide Lyase Family 3	pectate lyase [Aspergillus nidulans FGSC A4]	260	0.438	165	2e-41	Pectate lyase, catalytic	Pectin lyase fold/virulence factor
99248	Pectin	Rhamnogalacturonan lyase	PL4_1 Polysaccharide Lyase Family 4	PTRG_07312 [Pyrenophora tritici-repentis]	531	0.6979	749	0	Rhamnogalacturonase B	Glycoside hydrolase-type carbohydrate-binding	Galactose-binding like
99421	Cellulose	Alpha-glucosidase	GH18	ENSP00000420449 [Homo sapiens]	2227	0.2188	94	2e-19	Cell surface antigen	Glycoside hydrolase, family 18, catalytic domain	Glycoside hydrolase, chitinase active site			Chitinase.
101196	Pectin	Rhamnogalacturonan lyase	PL4_3 Polysaccharide Lyase Family 4	Lema_T042980.1 [Leptosphaeria maculans]	733	0.7836	999.99	0	Carbohydrate-binding-like fold	Galactose-binding like	Glycoside hydrolase-type carbohydrate-binding
101384	Xylan	Endoxylanase	CBM1|AA9	CC1G_02536T0 [Coprinopsis cinerea okayama7]	374	0.4736	97.1	5e-21	Cellulose-binding region, fungal
101630	?	Periplasmic beta-glucosidase	GH3	Periplasmic beta-glucosidase [Escherichia coli str. K-12 substr. W3110]	765	0.3241	353	9e-98	Glycoside hydrolase, family 3	Carbohydrate-binding				Beta-glucosidase.
101802	Cutin	Cutinase	CE5	PTRG_05435 [Pyrenophora tritici-repentis]	253	0.7848	393	1e-110	Cutinase
102085	?	Phospholipase	CE1	N/A	N/A	N/A	N/A	N/A	Phospholipase/carboxylesterase
103863	Glacto(gluco)-mannan	Alpha-mannosidase	GH47	PTRG_06326 [Pyrenophora tritici-repentis]	942	0.6338	999.99	0	Glycoside hydrolase, family 47					Mannosyl-oligosaccharide 1,2-alpha-mannosidase.
103883	?	Putative endo-beta-1,4-glucanase	CBM1|GH72	putative endo-beta-1,4-glucanase [Aspergillus nidulans FGSC A4]	357	0.4553	291	2e-79	Cellulose-binding region, fungal	Glycoside hydrolase, family 61
104286	Xylan	Endoxylanase	GH11	TSTA_023090 [Talaromyces stipitatus]	213	0.6697	318	8e-88	Glycoside hydrolase, family 11	Concanavalin A-like lectin/glucanase
106428	?	Putative beta-glucosidase	GH17	putative beta-glucosidase [Aspergillus nidulans FGSC A4]	555	0.3657	194	2e-50	Glycoside hydrolase, catalytic core					Glucan 1,3-beta-glucosidase.
107003	Cellulose	Cellobiohydrolase	GH6	PTRG_03444 [Pyrenophora tritici-repentis]	399	0.8521	710	0	Glycoside hydrolase, family 6	1, 4-beta cellobiohydrolase
107930	Glacto(gluco)-mannan	Beta-mannosidase	GH27 | CBM35	Lema_T082240.1 [Leptosphaeria maculans]	1497	0.6857	792	0	Glycoside hydrolase, family 27, clan GH-D	Galactose-binding like				Alpha-galactosidase.
108104	?	Beta-xylosidase	GH3	beta-xylosidase [Aspergillus nidulans]	802	0.4308	584	1e-167	Glycoside hydrolase, family 3					Beta-glucosidase.
109047	Cellulose	Cellobiohydrolase	GH7	PTRG_05143 [Pyrenophora tritici-repentis]	493	0.756	654	0	Glycoside hydrolase, family 7	Concanavalin A-like lectin/glucanase
109336	?	Beta-glucocerebrosidase	N/A	N/A	N/A	N/A	N/A	N/A	Glycoside hydrolase, family 30					Beta-glucocerebrosidase
109868	?	Chitinase.	GH18	N/A	N/A	N/A	N/A	N/A	Glycoside hydrolase, family 18	Chitinase II				Chitinase.
109891	?	Alpha-L-arabinofuranosidase	GH62	alpha-L-arabinofuranosidase [Aspergillus sojae]	328	0.4259	230	6e-61	Glycoside hydrolase, family 62
112805	Cellulase	Alpha-glucosidase	GH31	PTRG_04670 [Pyrenophora tritici-repentis]	1054	0.8426	999.99	0	Glycoside hydrolase, family 31
114329	Pectin	Pectin lyase	PL1_4 Polysaccharide Lyase Family 1	PTRG_03919 [Pyrenophora tritici-repentis]	378	0.8121	644	0	Pectate lyase/Amb allergen	Pectin lyase fold/virulence factor
115053	Pectin	Polygalacturonase	GH28	PTRG_10304 [Pyrenophora tritici-repentis]	448	0.8169	770	0	Glycoside hydrolase, family 28	Parallel beta-helix repeat	Pectin lyase fold/virulence factor
116868	Pectin	Rhamnogalacturonan acetylesterase	CE12	35861.m000015 [Ricinus communis]	414	0.2389	51.6	2e-07	Lipase, GDSL	Esterase, SGNH hydrolase-type
120473	?	Licheninase.	GH16	N/A	N/A	N/A	N/A	N/A	Glycoside hydrolase, family 16	Glycoside hydrolase, family 16, CRH1, predicted	Concanavalin A-like lectin/glucanase			Licheninase.
123816	Cellulose	Alpha-amylase	Alpha-glucosidase	PTRG_08699 [Pyrenophora tritici-repentis]	579	0.8272	999.99	0	Glycosyl hydrolase, family 13, catalytic region	Glycoside hydrolase, catalytic core				Alpha-amylase
127350	Glacto(gluco)-mannan	Alpha-mannosidase	GH47	Lema_T097780.1 [Leptosphaeria maculans]	632	0.6917	872	0	Glycoside hydrolase, family 47					Mannosyl-oligosaccharide 1,2-alpha-mannosidase.
127667	Cellulose	Alpha-glucosidase	GH31	PTRG_01285 [Pyrenophora tritici-repentis]	855	0.8086	999.99	0	Glycoside hydrolase, family 31	Peptidase M14, carboxypeptidase A				Glucan 1,3-alpha-glucosidase.
129762	Pectin	Beta-D-galactosidase	GH2	estExt_Genewise1Plus.C_680159 [Selaginella moellendorffii]	1098	0.2607	123	2e-28	Glycoside hydrolase family 2, carbohydrate-binding	Glycoside hydrolase family 2, immunoglobulin-like beta-sandwich / TIM barrel	Invasin/intimin cell-adhesion	Galactose-binding like		Beta-glucuronidase.
133912	?	Lipase	CE16	N/A	N/A	N/A	N/A	N/A	Lipase, GDSL	N-6 adenine-specific DNA methylase, conserved site	Esterase, SGNH hydrolase-type
134099	Pectin	Polygalacturonase	GH76	Sb03g013310.1 [Sorghum bicolor]	693	0.3	64.3	1e-10	Glycoside hydrolase, family 76	Six-hairpin glycosidase-like				Mannan endo-1,6-beta-mannosidase.
134328	?	Mannosyl-oligosaccharide glucosidase.	GH63	N/A	N/A	N/A	N/A	N/A	Glycoside hydrolase, family 37	Glycoside hydrolase, family 63	Six-hairpin glycosidase-like			Mannosyl-oligosaccharide glucosidase.
136331	Cellulose	Alpha-glucosidase	GH31	PTRG_05761 [Pyrenophora tritici-repentis]	913	0.7995	999.99	0	Glycoside hydrolase, family 31					Alpha-glucosidase.
138645	?	Alpha,alpha-trehalase.	GH37	N/A	N/A	N/A	N/A	N/A	Glycoside hydrolase, family 37	Six-hairpin glycosidase-like				Alpha,alpha-trehalase.
138680	Pectin	Beta-D-galactosidase	GH35	estExt_Genewise1.C_230338 [Cochliobolus heterostrophus]	950	0.8294	999.99	0	Glycoside hydrolase, family 35					Beta-galactosidase.
138841	?	Alpha-galactosidase	GH27	alpha-galactosidase [Aspergillus niger CBS 120.49]	443	0.4875	410	1e-115	Glycoside hydrolase, family 27					Alpha-galactosidase.
142403	?	Alpha-L-arabinofuranosidase	GH62	alpha-L-arabinofuranosidase [Aspergillus sojae]	328	0.6968	463	1e-131	Glycoside hydrolase, family 62	Glycoside hydrolase, clan GH-D
144640	?	Mannosyl-oligosaccharide glucosidase.	GH93	N/A	N/A	N/A	N/A	N/A	Neuraminidase
150577	Pectin	Rhamnogalacturonan lyase	PL4_1 Polysaccharide Lyase Family 4	fgenesh1_pg.C_scaffold_15000067 [Cochliobolus heterostrophus]	547	0.8568	995	0	Rhamnogalacturonase B, N-terminal	Carbohydrate-binding-like fold	Galactose-binding like	Glycoside hydrolase-type carbohydrate-binding
152014	?	Chitinase.	GH18	N/A	N/A	N/A	N/A	N/A	Glycoside hydrolase, family 18	Chitinase II	Glycoside hydrolase, chitinase active site			Chitinase.
152622	?	Pectate lyase	PL3_2 Polysaccharide Lyase Family 3	pectate lyase [Aspergillus nidulans FGSC A4]	254	0.4504	196	9e-51	Pectate lyase, catalytic	Pectin lyase fold/virulence factor
153112	Cellulose	Cellobiohydrolase	GH6	fgenesh1_pm.C_scaffold_10000055 [Cochliobolus heterostrophus]	382	0.8455	670	0	Glycoside hydrolase, family 6	1, 4-beta cellobiohydrolase
153422	?	Mannan endo-1,6-beta-mannosidase.	GH76	N/A	N/A	N/A	N/A	N/A	Glycoside hydrolase, family 76	Six-hairpin glycosidase-like				Mannan endo-1,6-beta-mannosidase.
153838	Pectin	Pectate lyase	PL1 Polysaccharide Lyase Family 1	fgenesh1_pg.C_scaffold_15000006 [Cochliobolus heterostrophus]	317	0.8296	554	1e-158	Pectate lyase/Amb allergen	Pectin lyase fold/virulence factor
154122	Pectin	Alpha-rhamnosidase	GH78	PTRG_05955 [Pyrenophora tritici-repentis]	675	0.7077	962	0	Bacterial alpha-L-rhamnosidase	Six-hairpin glycosidase-like
155010	Glacto(gluco)-mannan	Beta-mannosidase	GH2	Lema_T087180.1 [Leptosphaeria maculans]	1312	0.7367	999.99	0	Thaumatin, pathogenesis-related	Glycoside hydrolase family 2, immunoglobulin-like beta-sandwich / carbohydrate binding	Galactose-binding like			Beta-mannosidase.
155226	Pectin	Pectin methylesterase	CE8	estExt_Genewise1Plus.C_230214 [Cochliobolus heterostrophus]	338	0.6784	448	1e-126	Pectinesterase, catalytic	Pectin lyase fold/virulence factor				Pectinesterase.
155271	Cutin	Cutinase	CE5	FGSG_02342T0 [Fusarium graminearum]	226	0.6243	261	1e-70	Cutinase
155442	Glacto(gluco)-mannan	Beta-mannosidase	GH2	TSTA_034240 [Talaromyces stipitatus]	852	0.2105	115	7e-26	Glycoside hydrolase family 2, carbohydrate-binding	Glycoside hydrolase family 2, immunoglobulin-like beta-sandwich	Galactose-binding like			Beta-mannosidase.
155732	Pectin	Endoarabinase	GH43	estExt_fgenesh2_pm.C_70020 [Thielavia terrestris]	319	0.6491	412	1e-116	Glycoside hydrolase, family 43, endo-1, 5-alpha-L-arabinosidase
156189	Cellulose	Alpha-amylase	Alpha-glucosidase	Lema_T060690.1 [Leptosphaeria maculans]	585	0.801	999.99	0	Glycosyl hydrolase, family 13	Glycoside hydrolase, catalytic core				Alpha-amylase
156525	?	Beta-1,2-D-glucosidase	GH3	beta-1,2-D-glucosidase [Septoria lycopersici]	803	0.4269	606	1e-174	Glycoside hydrolase, family 3	GPCR, rhodopsin-like				Beta-glucosidase.
158076	?	Alpha-L-fucosidase.	GH29	N/A	N/A	N/A	N/A	N/A	Glycoside hydrolase, family 29 (alpha-L-fucosidase)	Alpha-L-fucosidase				Alpha-L-fucosidase.
158306	?	Acetylxylan esterase	CE5	acetylxylan esterase (MCYG_08575) [Arthroderma otae CBS 113480]	307	0.3304	115	1e-26	Cutinase	Lipase, active site
158404	?	Beta-glucosidase	GH3	beta-glucosidase [Aspergillus niger B1]	860	0.4629	726	0	Glycoside hydrolase, family 3	Glycoside hydrolase, family 1				Beta-glucosidase.
158597	?	Mannan endo-1,6-beta-mannosidase.	GH76	N/A	N/A	N/A	N/A	N/A	Glycoside hydrolase, family 76	Six-hairpin glycosidase-like				Mannan endo-1,6-beta-mannosidase.
158794	?	Endopolygalacturonase	GH28	endopolygalacturonase [Cochliobolus carbonum]	364	0.7506	571	1e-163	Glycoside hydrolase, family 28	Parallel beta-helix repeat	Pectin lyase fold/virulence factor			Polygalacturonase.
158795	?	Alpha-galactosidase C	GH36	alpha-galactosidase C [Aspergillus niger CBS 120.49]	747	0.5585	839	0	Glycoside hydrolase, family 36	Glycoside hydrolase, clan GH-D
159415	?	Endo-1,4-beta-gluconase	GH12	endo-1,4-beta-D-glucanase [Aspergillus aculeatus No.F-50]	237	0.5689	267	2e-72	Glycoside hydrolase, family 12	Concanavalin A-like lectin/glucanase
159629	?	Endo-beta-1,6-glucanase	Endo-beta-1,6-glucanase	endo-beta-1,6-glucanase [Aspergillus nidulans FGSC A4]	409	0.4344	316	8e-87	Glycoside hydrolase, family 5	Phosphopantetheine attachment site
159757	Pectin	Alpha-rhamnosidase	GH78	Lema_T012710.1 [Leptosphaeria maculans]	840	0.594	906	0	Bacterial alpha-L-rhamnosidase	Six-hairpin glycosidase-like
159803	Pectin	Pectin methylesterase	GH131	CH063_14109T0 [Colletotrichum higginsianum]	585	0.3235	55.1	4e-08						Exo-alpha-sialidase.
160746	Glacto(gluco)-mannan	Beta-mannosidase	GH2	SNOG_13101 [Stagonospora nodorum]	880	0.6139	999.99	0	Glycoside hydrolase family 2, immunoglobulin-like beta-sandwich	Galactose-binding like				Beta-mannosidase.
161026	Cellulose	Alpha-glucosidase	GH31	fgenesh1_pg.C_scaffold_25000042 [Cochliobolus heterostrophus]	758	0.8828	999.99	0	Glycoside hydrolase, family 31					Glucan 1,3-alpha-glucosidase.
161885	Xylan	Endoxylanase	CBM1 | GH10	fgenesh1_pg.C_scaffold_35000013 [Cochliobolus heterostrophus]	391	0.8276	651	0	Glycoside hydrolase, family 10	Cellulose-binding region, fungal
162210	?	Beta-glucosidase	GH1	beta-glucosidase [Thermoanaerobacter brockii]	450	0.3995	317	5e-87	Glycoside hydrolase, family 1					Beta-glucosidase.
162660	Glacto(gluco)-mannan	Beta-mannosidase	GH27 | CBM35	Lema_T082240.1 [Leptosphaeria maculans]	1497	0.322	253	8e-68	Glycoside hydrolase, family 27					Alpha-galactosidase.
162808	Glacto(gluco)-mannan	Alpha-mannosidase	GH47	PTRG_10638 [Pyrenophora tritici-repentis]	1050	0.7985	999.99	0	Glycoside hydrolase, family 47	Glycoside hydrolase, clan GH-D	Galactose-binding like
162920	?	Licheninase.	CBM18 | GH16	N/A	N/A	N/A	N/A	N/A	Glycoside hydrolase, family 16	Chitin-binding, type 1	Whey acidic protein, 4-disulphide core	Concanavalin A-like lectin/glucanase		Licheninase.
162945	Cellulose	Alpha-amylase	Alpha-glucosidase	Lema_T038090.1 [Leptosphaeria maculans]	626	0.7695	999.99	0	Glycosyl hydrolase, family 13	Glycoside hydrolase, catalytic core				Alpha-amylase
163033	?	Glucan 1,4-alpha-glucosidase.	GH15	N/A	N/A	N/A	N/A	N/A	Glycoside hydrolase, family 15	Six-hairpin glycosidase-like				Glucan 1,4-alpha-glucosidase.
163139	?	Glucan 1,3-beta-glucosidase.	GH17	N/A	N/A	N/A	N/A	N/A	Glycoside hydrolase, catalytic core					Glucan 1,3-beta-glucosidase.
163894	Cellulose	Alpha-amylase	Alpha-glucosidase	AO090020000176 [Aspergillus oryzae]	584	0.2161	55.8	3e-08	Glycosyl hydrolase, family 13	Alpha-amylase, thermostable	Glycoside hydrolase, catalytic core			Alpha-amylase
164208	Glacto(gluco)-mannan	Alpha-mannosidase	GH47	PTRG_11290 [Pyrenophora tritici-repentis]	639	0.7372	989	0	Glycoside hydrolase, family 47					Mannosyl-oligosaccharide 1,2-alpha-mannosidase.
164245	Glacto(gluco)-mannan	Alpha-mannosidase	GH47	Lema_T057160.1 [Leptosphaeria maculans]	569	0.7838	953	0	Glycoside hydrolase, family 47	Beta-lactamase, class D active site				Mannosyl-oligosaccharide 1,2-alpha-mannosidase.
164370	?	Endo-beta-1,4-xylanse	GH10	endo-beta-1,4 xylanase [Cochliobolus carbonum SB111]	331	0.8595	523	1e-149	Glycoside hydrolase, family 10
164455	Cellulose	Alpha-glucosidase	GH31	PTRG_10838 [Pyrenophora tritici-repentis]	1066	0.8805	999.99	0	Glycoside hydrolase, family 31					Alpha-glucosidase.
164545	?	1,4-beta-D-glucan cellobiohydrolase B precursor	CBM1|GH65	1,4-beta-D-glucan cellobiohydrolase B precursor	536	0.4929	76.3	4e-14	Cellulose-binding region, fungal	Glucose-methanol-choline oxidoreductase	Copper amine oxidase	Carbohydrate-binding family 9/cellobiose dehydrogenase, cytochrome		Choline dehydrogenase.
164766	?	Licheninase.	GH16	N/A	N/A	N/A	N/A	N/A	Glycoside hydrolase, family 16	Concanavalin A-like lectin/glucanase				Licheninase.
164889	?	Endo-beta-1,3-glucanase	GH17	endo-beta-1,3-glucanase [Aspergillus nidulans FGSC A4]	649	0.4678	469	1e-132	Glycoside hydrolase, family 17
165151	?	Alpha,alpha-trehalase.	GH65 | CBM32	N/A	N/A	N/A	N/A	N/A	Glycoside hydrolase family 65	Coagulation factor 5/8 type, C-terminal	Six-hairpin glycosidase-like	Galactose-binding like	Glycoside hydrolase-type carbohydrate-binding	Alpha,alpha-trehalase.
165513	Glacto(gluco)-mannan	Alpha-mannosidase	GH47	SNOG_06721 [Stagonospora nodorum]	612	0.7645	863	0	Glycoside hydrolase, family 47					Mannosyl-oligosaccharide 1,2-alpha-mannosidase.
166186	Pectin	Beta-D-galactosidase	GH2	PTRG_02967 [Pyrenophora tritici-repentis]	1036	0.8754	999.99	0	Glycoside hydrolase, family 2	Glycoside hydrolase family 2, immunoglobulin-like beta-sandwich / TIM barrel / carbohydrate binding / domain 5	Galactose-binding like			Beta-glucuronidase.
166263	Glacto(gluco)-mannan	Alpha-mannosidase	GH47	PTRG_02844 [Pyrenophora tritici-repentis]	653	0.8617	999.99	0	Glycoside hydrolase, family 47
166782	?	Mannan endo-1,6-beta-mannosidase.	GH76	N/A	N/A	N/A	N/A	N/A	Glycoside hydrolase, family 76	Mannan endo-1,6-alpha-mannosidase	Six-hairpin glycosidase-like			Mannan endo-1,6-beta-mannosidase.
168424	?	Endo-beta-1,3-glucanase	GH17	endo-beta-1,3-glucanase [Aspergillus nidulans FGSC A4]	649	0.2175	54.3	5e-08	Glycoside hydrolase, family 17					Glucan 1,3-beta-glucosidase.
168504	?	beta-1,3-glucanase [Aspergillus nidulans FGSC A4]	Beta-1,3-glucanase	beta-1,3-glucanase [Aspergillus nidulans FGSC A4]	831	0.5401	601	1e-172	Glycoside hydrolase, catalytic core
168656	?	Acetylxylan esterase	CE5	acetylxylan esterase (MCYG_08575) [Arthroderma otae CBS 113480]	307	0.2954	85.9	2e-17	Cutinase
168743	?	Alpha,alpha-trehalase.	GH37	N/A	N/A	N/A	N/A	N/A	Glycoside hydrolase, family 37	Neutral trehalase Ca2+ binding	Six-hairpin glycosidase-like			Alpha,alpha-trehalase.
168832	?	Acetylxylan esterase	CE5	acetylxylan esterase (MCYG_08575) [Arthroderma otae CBS 113480]	307	0.3142	102	2e-22	Cutinase
168866	?	Alpha-arabinofuranosidase	GH51	alpha-arabinofuranosidase [Aspergillus nidulans FGSC A4]	504	0.666	733	0	Alpha-L-arabinofuranosidase, C-terminal	Glycoside hydrolase, catalytic core				Alpha-L-arabinofuranosidase.
168922	Cellulose	Alpha-amylase	Alpha-glucosidase	EEA19647.1 [Penicillium marneffei]	595	0.2703	82.4	4e-16	Glycoside hydrolase family 13	Carbohydrate-binding-like fold	Glycosyl hydrolase, family 13			Alpha-amylase
168996	?	Acetylxylan esterase	CE5	acetylxylan esterase (MCYG_08575) [Arthroderma otae CBS 113480]	307	0.2837	68.9	2e-12	Cutinase
169010	?	Esterase	CE3	N/A	N/A	N/A	N/A	N/A	Esterase, SGNH hydrolase-type
169377	Cellulose	Alpha-amylase	Alpha-glucosidase	TC02338.1 [Tribolium castaneum]	539	0.2932	53.5	2e-07	Glycosyl hydrolase, family 13	Glycoside hydrolase, family 13	Alpha-amylase, C-terminal all beta	Immunoglobulin E-set		1,4-alpha-glucan branching enzyme/starch branching enzyme II
169395	?	Esterase	CE3	esterase [Aspergillus terreus ATCC20542]	1529	0.3373	80.5	3e-16	Lipase, GDSL	Esterase, SGNH hydrolase-type
169624	Cellulose	Alpha-glucosidase	GH31	SS1G_07331.1 [Sclerotinia sclerotiorum]	1109	0.7132	999.99	0	Glycoside hydrolase, family 31					Alpha-glucosidase.
170878	Pectin	Pectin methylesterase	CE8	estExt_Genewise1Plus.C_100028 [Cochliobolus heterostrophus]	333	0.7327	507	1e-144	Pectinesterase, catalytic	Pectin lyase fold/virulence factor
173831	Pectin	Beta-D-galactosidase	GH35	estExt_fgenesh1_pg.C_60153 [Cochliobolus heterostrophus]	1009	0.845	999.99	0	Glycoside hydrolase, family 35					Beta-galactosidase.
174004	?	Putative endoglucanase precursor	CBM1|AA13	putative endoglucanase precursor [Cochliobolus heterostrophus]	319	0.645	411	1e-115	Cellulose-binding region, fungal	F-actin capping protein, beta subunit
174015	Pectin	Pectin methylesterase	GH43	AFL2G_08528 [Aspergillus flavus]	573	0.4117	80.1	3e-15	Glycoside hydrolase, family 43
174636	Xylan	Endoxylanase	GH10	SNOG_03593 [Stagonospora nodorum]	356	0.6901	494	1e-140	Glycoside hydrolase, family 10	Phox-like	Vps5 C terminal like
174814	Pectin	Beta-D-galactosidase	GH35	estExt_Genewise1Plus.C_90178 [Cochliobolus heterostrophus]	1010	0.8673	999.99	0	Glycoside hydrolase, family 35					Beta-galactosidase.
175032	?	Esterase	CE3	esterase [Aspergillus terreus ATCC20542]	1529	0.282	80.9	1e-15	Lipase, GDSL	NAD(P)-binding	Esterase, SGNH hydrolase-type
175939	Xylan	Endoxylanase	CE15	estExt_fgenesh1_pg.C_210022 [Sphaerobolus stellatus]	1319	0.543	408	1e-114
176237	Glacto(gluco)-mannan	Alpha-mannosidase	GH38	PTRG_07708 [Pyrenophora tritici-repentis]	1121	0.8533	999.99	0	Glycoside hydrolase, family 38	Glycoside hydrolase/deacetylase, beta/alpha-barrel				Alpha-mannosidase.
176330	?	Beta-glucosidase	GH3	beta-glucosidase [Aspergillus nidulans FGSC A4]	845	0.4341	654	0	Glycoside hydrolase, family 3	PA14	DNA-directed DNA polymerase, family A			Beta-glucosidase.
179766	?	Mannan endo-1,6-beta-mannosidase.	GH76	N/A	N/A	N/A	N/A	N/A	Glycoside hydrolase, family 76	Mannan endo-1,6-alpha-mannosidase	Six-hairpin glycosidase-like			Mannan endo-1,6-beta-mannosidase.
181038	?	Putative beta-glucosidase	GH3	putative beta-glucosidase [Aspergillus nidulans FGSC A4]	838	0.2445	73.9	2e-13	Glycoside hydrolase, family 3	Acyl-CoA N-acyltransferase				Beta-N-acetylhexosaminidase.
182707	?	Beta-glucosidase precursor	GH3	beta-glucosidase precursor [Aspergillus aculeatus No.F-50]	860	0.5968	999.99	0	Glycoside hydrolase, family 3					Beta-glucosidase.
183059	?	Beta-fructofuranosidase.	GH32	N/A	N/A	N/A	N/A	N/A	Glycosyl hydrolases family 32	Concanavalin A-like lectin/glucanase				Beta-fructofuranosidase.
183551	?	Beta-1,4-xylosidase	GH3	beta-1,4-xylosidase [Aspergillus oryzae HL15]	798	0.4679	673	0	Glycoside hydrolase, family 3					Beta-glucosidase.
184255	Pectin	Beta-D-galactosidase	GH2	NCU05956T0 [Neurospora crassa]	1020	0.2415	103	2e-22	Glycoside hydrolase family 2, immunoglobulin-like beta-sandwich /TIM barrel / carbohydrate binding	Galactose-binding like				Beta-glucuronidase.
